# Supplementary material for: A High Phosphorus Diet Affects Lipid Metabolism in Rat Liver: A DNA Microarray Analysis
Source: PubMed Central journal article supplement (PMC4871335; doi:10.1371/journal.pone.0155386), 2016-05-17

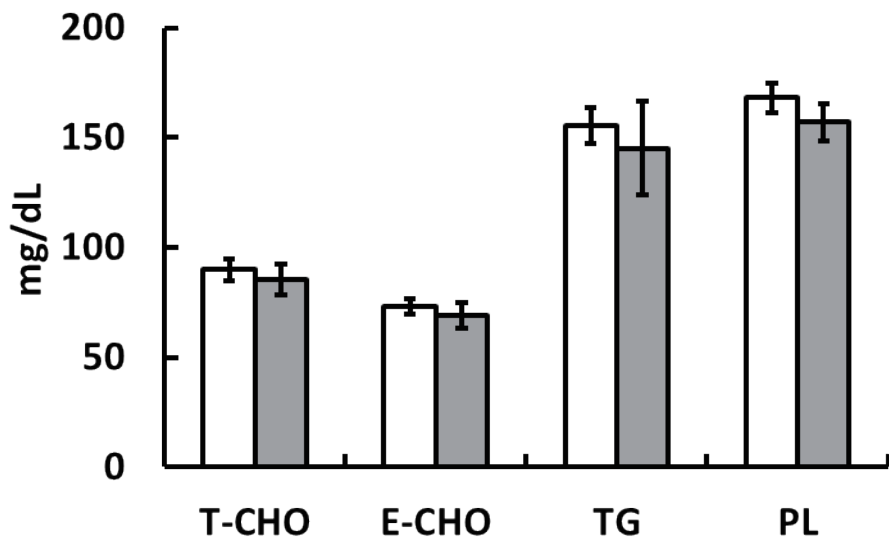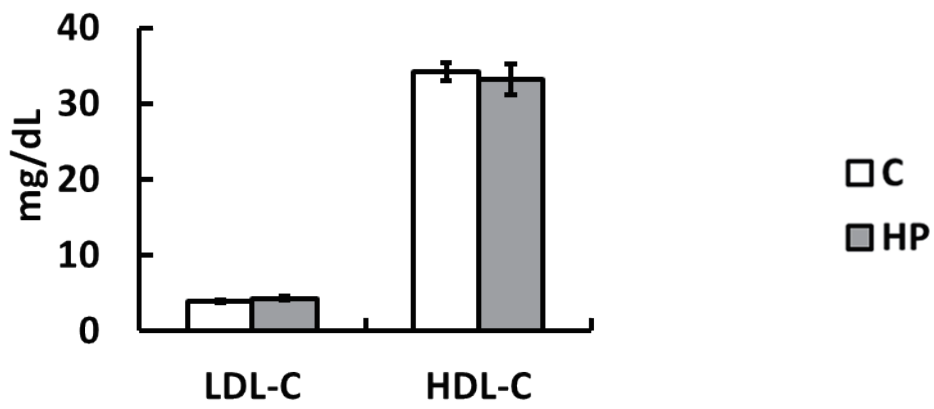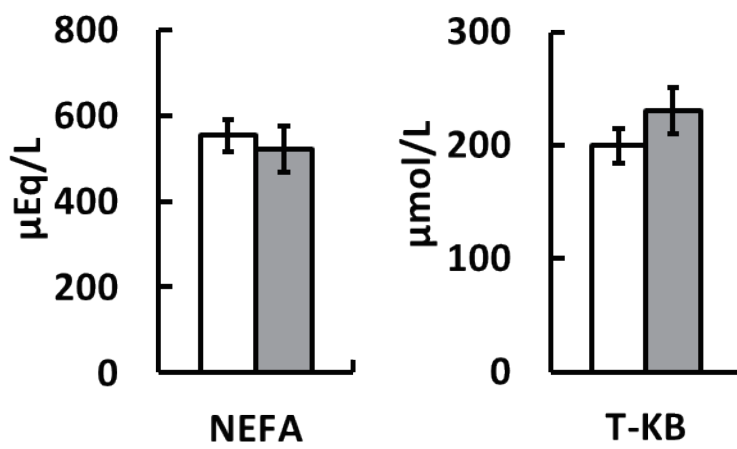

Supplement: pone.0155386.s002.pdf [file pone.0155386.s002.pdf]
