# Supplementary material for: A High Phosphorus Diet Affects Lipid Metabolism in Rat Liver: A DNA Microarray Analysis
Source: PubMed Central journal article supplement (PMC4871335; doi:10.1371/journal.pone.0155386), 2016-05-17
Supplement: pone.0155386.s007.pdf [file pone.0155386.s007.pdf]

S2 Table. Genes related to amino acid metabolism whose expression was altered in response to a HP diet.

| Probe ID                               | Gene Symbol    | Gene Title                                                                  | Average Difference | Expression |
|----------------------------------------|----------------|-----------------------------------------------------------------------------|--------------------|------------|
| <b>Amino acid catabolism</b>           |                |                                                                             |                    |            |
| 1397924_at                             | <i>Hibch</i>   | 3-hydroxyisobutyryl-Coenzyme A hydrolase                                    | 1.77E-01           | up         |
| 1372340_at                             | <i>Mat2b</i>   | methionine adenosyltransferase II, beta                                     | 1.39E-01           | up         |
| 1369864_a_at                           | <i>Sds</i>     | serine dehydratase                                                          | -1.11E+00          | down       |
| 1387178_a_at                           | <i>Cbs</i>     | cystathionine beta synthase                                                 | -1.76E-01          | down       |
| 1370936_at                             | <i>Dmgdh</i>   | dimethylglycine dehydrogenase                                               | -2.24E-01          | down       |
| 1368272_at                             | <i>Got1</i>    | glutamic-oxaloacetic transaminase 1, soluble (aspartate aminotransferase 1) | -5.17E-01          | down       |
| 1376427_a_at                           | <i>Gldc</i>    | glycine dehydrogenase (decarboxylating)                                     | -2.04E-01          | down       |
| 1370811_at                             | <i>Mpst*</i>   | mercaptopyruvate sulfurtransferase                                          | -2.29E-01          | down       |
| 1387665_at                             | <i>Bhmt</i>    | betaine-homocysteine S-methyltransferase                                    | -4.02E-01          | down       |
| 1387672_at                             | <i>Gnmt*</i>   | glycine N-methyltransferase                                                 | -1.76E-01          | down       |
| 1368720_at                             | <i>Tdo2</i>    | tryptophan 2,3-dioxygenase                                                  | -1.94E-01          | down       |
| 1396300_at,<br>1396301_x_at,1394479_at | <i>Afmid*</i>  | arylformamidase                                                             | -2.58E-01          | down       |
| 1387034_at                             | <i>Pah</i>     | phenylalanine hydroxylase                                                   | -2.36E-01          | down       |
| 1369790_at                             | <i>Tat</i>     | tyrosine aminotransferase                                                   | -8.14E-01          | down       |
| 1398514_at                             | <i>Hgd</i>     | homogentisate 1, 2-dioxygenase                                              | -2.27E-01          | down       |
| 1387307_at                             | <i>Hal</i>     | histidine ammonia lyase                                                     | -2.14E-01          | down       |
| 1368814_at                             | <i>Aldh6a1</i> | aldehyde dehydrogenase 6 family, member A1                                  | -2.12E-01          | down       |
| 1372920_at                             | <i>Prodh</i>   | proline dehydrogenase (oxidase) 1                                           | -3.96E-01          | down       |
| <b>Urea cycle</b>                      |                |                                                                             |                    |            |
| 1370151_at                             | <i>Cps1*</i>   | carbamoyl-phosphate synthetase 1                                            | -2.65E-01          | down       |
| 1370964_at                             | <i>Ass1</i>    | argininosuccinate synthase 1                                                | -2.41E-01          | down       |
| 1368272_at                             | <i>Got1</i>    | glutamic-oxaloacetic transaminase 1, soluble (aspartate aminotransferase 1) | -5.17E-01          | down       |
| 1370375_at                             | <i>Gls2*</i>   | glutaminase 2 (liver, mitochondrial)                                        | -3.12E-01          | down       |
| 1387052_at                             | <i>Gpt*</i>    | glutamic-pyruvate transaminase (alanine aminotransferase)                   | -2.13E-01          | down       |
| 1384903_at                             | <i>Gpt2*</i>   | glutamic pyruvate transaminase (alanine aminotransferase) 2                 | -2.03E-01          | down       |
| 1367729_at                             | <i>Oat*</i>    | ornithine aminotransferase                                                  | -1.95E-01          | down       |
| 1372920_at                             | <i>Prodh</i>   | proline dehydrogenase (oxidase) 1                                           | -3.96E-01          | down       |
| <b>Others</b>                          |                |                                                                             |                    |            |
| 1387725_at                             | <i>Gulo</i>    | gulonolactone (L-) oxidase                                                  | -2.98E-01          | down       |

All genes were included in GO terms that were significantly enriched ( $p < 0.05$ ) in DEGs

(Figure 1), except \*DEG not included in selected GO terms but showed the identical function.
