# Supplementary material for: A High Phosphorus Diet Affects Lipid Metabolism in Rat Liver: A DNA Microarray Analysis
Source: PLoS One. 2016 May 17;11(5):e0155386. doi: 10.1371/journal.pone.0155386 (PMC4871335; doi:10.1371/journal.pone.0155386)
Supplement: S1 Table — (XLSX) [file pone.0155386.s006.xlsx]

## Sheet: Sheet1
S1 Table. A full list of differentially expressed probe sets.
Upregulated by a HP diet intake (353 probe sets)
Probe Set ID	Gene Ontology Biological Process	Gene Ontology Cellular Component	Gene Ontology Molecular Function	Gene Symbol	Gene Title	Control_1	Control_2	Control_4	Control_5	HP_1	HP_2	HP_3	HP_4	FDR (Control < HP)	RP stat (Control < HP)	Rank (Control < HP)
1398250_at	0001676 // long-chain fatty acid metabolic process // not recorded /// 0006629 // lipid metabolic process // inferred from electronic annotation /// 0006629 // lipid metabolic process // traceable author statement /// 0006637 // acyl-CoA metabolic process // inferred from electronic annotation	0005737 // cytoplasm // inferred from electronic annotation /// 0005739 // mitochondrion // not recorded /// 0005829 // cytosol // inferred from direct assay	0004091 // carboxylesterase activity // inferred from electronic annotation /// 0016290 // palmitoyl-CoA hydrolase activity // inferred from electronic annotation /// 0016787 // hydrolase activity // inferred from electronic annotation /// 0016790 // thiolester hydrolase activity // inferred from electronic annotation /// 0047617 // acyl-CoA hydrolase activity // inferred from direct assay /// 00…	Acot1	acyl-CoA thioesterase 1	6.59721	5.89571	5.47448	5.80367	7.12622	8.31278	7.54645	7.44114	0	6.23539	1
1371237_a_at	0006810 // transport // inferred from electronic annotation /// 0006875 // cellular metal ion homeostasis // not recorded /// 0006882 // cellular zinc ion homeostasis // not recorded /// 0007263 // nitric oxide mediated signal transduction // not recorded /// 0008634 // negative regulation of survival gene product expression // not recorded /// 0010043 // response to zinc ion // inferred from exp…	0005576 // extracellular region // inferred from electronic annotation /// 0005615 // extracellular space // inferred from direct assay /// 0005622 // intracellular // not recorded /// 0005634 // nucleus // inferred from sequence or structural similarity /// 0005737 // cytoplasm // inferred from sequence or structural similarity /// 0005764 // lysosome // not recorded /// 0005829 // cytosol // no…	0005179 // hormone activity // inferred from electronic annotation /// 0005507 // copper ion binding // not recorded /// 0008270 // zinc ion binding // inferred from sequence or structural similarity /// 0042562 // hormone binding // inferred from direct assay /// 0046872 // metal ion binding // not recorded /// 0046872 // metal ion binding // inferred from electronic annotation /// 0046982 // pr…	Mt1a /// Ttr	metallothionein 1a /// transthyretin	9.65738	10.0253	9.39918	8.89436	10.6079	9.95468	10.7907	11.2644	0	18.8621	2
1388271_at	0006882 // cellular zinc ion homeostasis // not recorded /// 0007263 // nitric oxide mediated signal transduction // not recorded /// 0010273 // detoxification of copper ion // not recorded /// 0035690 // cellular response to drug // not recorded /// 0036016 // cellular response to interleukin-3 // not recorded /// 0036018 // cellular response to erythropoietin // not recorded /// 0045926 // nega…	0005622 // intracellular // not recorded /// 0005634 // nucleus // inferred from sequence or structural similarity /// 0005737 // cytoplasm // inferred from sequence or structural similarity /// 0048471 // perinuclear region of cytoplasm // inferred from sequence or structural similarity	0008144 // drug binding // not recorded /// 0008270 // zinc ion binding // inferred from direct assay /// 0008270 // zinc ion binding // not recorded /// 0008270 // zinc ion binding // inferred from sequence or structural similarity /// 0046870 // cadmium ion binding // inferred from direct assay /// 0046872 // metal ion binding // inferred from electronic annotation	Mt2A	metallothionein 2A	8.52507	8.57857	8.10316	7.52658	9.17645	8.626	9.35712	9.64632	0	30.9744	3
1387643_at	0008284 // positive regulation of cell proliferation // not recorded /// 0046326 // positive regulation of glucose import // inferred from electronic annotation /// 0046326 // positive regulation of glucose import // not recorded /// 0070374 // positive regulation of ERK1 and ERK2 cascade // inferred from electronic annotation /// 0070374 // positive regulation of ERK1 and ERK2 cascade // not rec…	---	0005104 // fibroblast growth factor receptor binding // inferred from electronic annotation /// 0008083 // growth factor activity // inferred from electronic annotation	Fgf21	fibroblast growth factor 21	7.72459	7.37044	6.9783	7.30725	7.95373	8.09634	8.28029	8.7534	0	37.4396	4
1372727_at	---	---	---	---	---	11.9046	9.49234	9.49884	10.8594	12.1313	11.9521	11.2796	11.2787	0	49.4942	5
1377037_at	0000038 // very long-chain fatty acid metabolic process // not recorded /// 0000038 // very long-chain fatty acid metabolic process // inferred from electronic annotation /// 0001676 // long-chain fatty acid metabolic process // not recorded /// 0001676 // long-chain fatty acid metabolic process // inferred from electronic annotation /// 0006104 // succinyl-CoA metabolic process // not recorded /…	0005777 // peroxisome // not recorded /// 0005829 // cytosol // not recorded /// 0005829 // cytosol // inferred from electronic annotation	0005102 // receptor binding // not recorded /// 0016290 // palmitoyl-CoA hydrolase activity // inferred from electronic annotation /// 0016790 // thiolester hydrolase activity // inferred from electronic annotation /// 0047617 // acyl-CoA hydrolase activity // not recorded /// 0047617 // acyl-CoA hydrolase activity // inferred from electronic annotation	Acot3 /// Acot4	acyl-CoA thioesterase 3 /// acyl-CoA thioesterase 4	9.03163	8.60057	8.23144	8.0082	9.13331	9.54215	9.2006	9.21886	0	57.9508	6
1384392_at	0001709 // cell fate determination // not recorded /// 0007140 // male meiosis // not recorded /// 0007283 // spermatogenesis // not recorded /// 0009954 // proximal/distal pattern formation // not recorded /// 0010628 // positive regulation of gene expression // not recorded /// 0030326 // embryonic limb morphogenesis // not recorded /// 0034653 // retinoic acid catabolic process // not recorded…	0005783 // endoplasmic reticulum // inferred from electronic annotation /// 0005789 // endoplasmic reticulum membrane // inferred from electronic annotation /// 0005792 // microsome // inferred from electronic annotation /// 0005792 // microsome // not recorded /// 0016020 // membrane // inferred from electronic annotation	0001972 // retinoic acid binding // not recorded /// 0004497 // monooxygenase activity // inferred from electronic annotation /// 0005506 // iron ion binding // inferred from electronic annotation /// 0008401 // retinoic acid 4-hydroxylase activity // not recorded /// 0009055 // electron carrier activity // inferred from electronic annotation /// 0016491 // oxidoreductase activity // inferred fro…	Cyp26b1	cytochrome P450, family 26, subfamily b, polypeptide 1	7.97385	7.31677	7.3153	7.25039	8.22617	8.53894	8.48512	7.85578	0	63.4823	7
1398640_at	0007264 // small GTPase mediated signal transduction // inferred from electronic annotation /// 0015031 // protein transport // inferred from electronic annotation	---	0000166 // nucleotide binding // inferred from electronic annotation /// 0005525 // GTP binding // inferred from electronic annotation	Rab30	RAB30, member RAS oncogene family	8.46339	8.06149	7.36057	7.67649	8.45517	8.47838	8.7197	8.98954	0.000125	92.4307	8
1395255_at	---	---	---	---	---	11.3462	7.46514	7.63276	10.3183	11.0291	10.774	10.365	9.15599	0.000222222	94.9079	9
1389253_at	0002526 // acute inflammatory response // inferred from electronic annotation /// 0002526 // acute inflammatory response // not recorded /// 0002544 // chronic inflammatory response // inferred from electronic annotation /// 0002544 // chronic inflammatory response // not recorded /// 0006807 // nitrogen compound metabolic process // inferred from electronic annotation /// 0006916 // anti-apoptos…	0005615 // extracellular space // not recorded	0016810 // hydrolase activity, acting on carbon-nitrogen (but not peptide) bonds // inferred from electronic annotation /// 0016811 // hydrolase activity, acting on carbon-nitrogen (but not peptide) bonds, in linear amides // inferred from electronic annotation /// 0017159 // pantetheine hydrolase activity // inferred from electronic annotation /// 0017159 // pantetheine hydrolase activity // not…	Vnn1	vanin 1	9.23705	8.98424	8.75326	9.27112	9.58169	9.65312	9.79706	9.68339	0.0002	96.9932	10
1373777_at	---	---	---	---	---	9.98812	10.4128	10.012	9.64214	9.86599	10.5983	11.5808	11.1504	0.000181818	98.7137	11
1374610_at	---	---	---	---	---	7.69669	6.72773	6.60216	6.89079	7.26139	8.04336	8.33244	7.324	0.000166667	102.338	12
1384115_at	0000038 // very long-chain fatty acid metabolic process // not recorded /// 0001666 // response to hypoxia // inferred from direct assay /// 0001676 // long-chain fatty acid metabolic process // not recorded /// 0006629 // lipid metabolic process // inferred from electronic annotation /// 0006637 // acyl-CoA metabolic process // inferred from direct assay /// 0006637 // acyl-CoA metabolic process…	0005739 // mitochondrion // inferred from direct assay /// 0005739 // mitochondrion // not recorded /// 0005739 // mitochondrion // inferred from electronic annotation /// 0005759 // mitochondrial matrix // inferred from electronic annotation	0004091 // carboxylesterase activity // inferred from electronic annotation /// 0005102 // receptor binding // not recorded /// 0016290 // palmitoyl-CoA hydrolase activity // inferred from direct assay /// 0016290 // palmitoyl-CoA hydrolase activity // inferred from electronic annotation /// 0016787 // hydrolase activity // inferred from electronic annotation /// 0016790 // thiolester hydrolase a…	Acot2	Acyl-CoA thioesterase 2	8.01674	7.70298	7.45864	7.68922	8.25348	8.37188	8.29114	8.3297	0.000230769	109.572	13
1370397_at	0001822 // kidney development // inferred from expression pattern /// 0019369 // arachidonic acid metabolic process // inferred from mutant phenotype /// 0043651 // linoleic acid metabolic process // inferred from direct assay /// 0046456 // icosanoid biosynthetic process // inferred from mutant phenotype /// 0048252 // lauric acid metabolic process // inferred from direct assay /// 0055114 // ox…	0005783 // endoplasmic reticulum // inferred from electronic annotation /// 0005789 // endoplasmic reticulum membrane // inferred from electronic annotation /// 0005792 // microsome // inferred from direct assay /// 0005792 // microsome // inferred from electronic annotation /// 0016020 // membrane // inferred from electronic annotation	0004497 // monooxygenase activity // inferred from electronic annotation /// 0005506 // iron ion binding // inferred from electronic annotation /// 0008391 // arachidonic acid monooxygenase activity // inferred from mutant phenotype /// 0009055 // electron carrier activity // inferred from electronic annotation /// 0016491 // oxidoreductase activity // inferred from electronic annotation /// 0016…	Cyp4a3	cytochrome P450, family 4, subfamily a, polypeptide 3	12.245	12.1432	11.7951	11.6989	12.5861	12.3767	12.7012	12.5678	0.000214286	112.64	14
1377014_at	0006468 // protein phosphorylation // not recorded /// 0006468 // protein phosphorylation // inferred from electronic annotation	---	0000166 // nucleotide binding // inferred from electronic annotation /// 0000287 // magnesium ion binding // not recorded /// 0000287 // magnesium ion binding // inferred from electronic annotation /// 0004672 // protein kinase activity // inferred from electronic annotation /// 0004674 // protein serine/threonine kinase activity // not recorded /// 0004674 // protein serine/threonine kinase acti…	Nim1	serine/threonine-protein kinase NIM1	9.0411	7.73107	7.16043	7.43925	8.97018	8.79542	8.65088	8.37201	0.0002	116.683	15
1369577_at	0007568 // aging // inferred from expression pattern /// 0007595 // lactation // not recorded /// 0009968 // negative regulation of signal transduction // inferred from electronic annotation /// 0016567 // protein ubiquitination // inferred from electronic annotation /// 0032355 // response to estradiol stimulus // inferred from electronic annotation /// 0032355 // response to estradiol stimulus …	0005622 // intracellular // inferred from electronic annotation	0005131 // growth hormone receptor binding // not recorded /// 0005159 // insulin-like growth factor receptor binding // not recorded /// 0005159 // insulin-like growth factor receptor binding // inferred from sequence or structural similarity /// 0005159 // insulin-like growth factor receptor binding // inferred from electronic annotation	Socs2	suppressor of cytokine signaling 2	7.90869	6.36015	6.35465	7.00997	8.10483	8.01125	7.36483	7.19814	0.0001875	117.137	16
1391433_at	0000038 // very long-chain fatty acid metabolic process // not recorded /// 0001666 // response to hypoxia // inferred from direct assay /// 0001676 // long-chain fatty acid metabolic process // not recorded /// 0006629 // lipid metabolic process // inferred from electronic annotation /// 0006637 // acyl-CoA metabolic process // inferred from direct assay /// 0006637 // acyl-CoA metabolic process…	0005739 // mitochondrion // inferred from direct assay /// 0005739 // mitochondrion // not recorded /// 0005739 // mitochondrion // inferred from electronic annotation /// 0005759 // mitochondrial matrix // inferred from electronic annotation	0004091 // carboxylesterase activity // inferred from electronic annotation /// 0005102 // receptor binding // not recorded /// 0016290 // palmitoyl-CoA hydrolase activity // inferred from direct assay /// 0016290 // palmitoyl-CoA hydrolase activity // inferred from electronic annotation /// 0016787 // hydrolase activity // inferred from electronic annotation /// 0016790 // thiolester hydrolase a…	Acot2	acyl-CoA thioesterase 2	9.77854	9.44145	9.25219	9.44855	9.89223	10.2553	10.0132	10.0086	0.000176471	129.16	17
1379606_at	0007264 // small GTPase mediated signal transduction // inferred from electronic annotation /// 0015031 // protein transport // inferred from electronic annotation	---	0000166 // nucleotide binding // inferred from electronic annotation /// 0005525 // GTP binding // inferred from electronic annotation	Rab30	RAB30, member RAS oncogene family	9.52052	8.76194	8.20955	8.71607	9.34461	9.37328	9.57886	9.63103	0.000666667	143.218	18
1371034_at	0001889 // liver development // not recorded /// 0001889 // liver development // inferred from electronic annotation /// 0001952 // regulation of cell-matrix adhesion // not recorded /// 0001952 // regulation of cell-matrix adhesion // inferred from electronic annotation /// 0002064 // epithelial cell development // not recorded /// 0002064 // epithelial cell development // inferred from electron…	0005634 // nucleus // inferred from direct assay /// 0005634 // nucleus // inferred from electronic annotation /// 0005634 // nucleus // not recorded	0001077 // RNA polymerase II core promoter proximal region sequence-specific DNA binding transcription factor activity involved in positive regulation of transcription // inferred from direct assay /// 0003677 // DNA binding // inferred from mutant phenotype /// 0003677 // DNA binding // not recorded /// 0003677 // DNA binding // inferred from electronic annotation /// 0003700 // sequence-specifi…	Onecut1	one cut homeobox 1	11.9106	7.90302	8.05649	10.8561	11.4462	11.074	10.8064	9.45011	0.000631579	146.659	19
1386885_at	0006629 // lipid metabolic process // inferred from electronic annotation /// 0006631 // fatty acid metabolic process // inferred from electronic annotation /// 0006635 // fatty acid beta-oxidation // inferred from electronic annotation /// 0008152 // metabolic process // inferred from electronic annotation	0005739 // mitochondrion // inferred from direct assay /// 0005739 // mitochondrion // not recorded /// 0005739 // mitochondrion // inferred from electronic annotation /// 0005777 // peroxisome // inferred from electronic annotation	0003824 // catalytic activity // inferred from electronic annotation /// 0005102 // receptor binding // not recorded /// 0016853 // isomerase activity // inferred from electronic annotation /// 0046872 // metal ion binding // inferred from electronic annotation	Ech1	enoyl CoA hydratase 1, peroxisomal	10.5426	9.91312	9.97557	10.4962	10.5844	10.7602	10.8205	10.8952	0.00095	164.807	20
1371886_at	0006629 // lipid metabolic process // inferred from electronic annotation /// 0006631 // fatty acid metabolic process // inferred from direct assay /// 0006631 // fatty acid metabolic process // inferred from electronic annotation /// 0006810 // transport // inferred from electronic annotation /// 0019254 // carnitine metabolic process, CoA-linked // not recorded	0005739 // mitochondrion // not recorded /// 0005739 // mitochondrion // traceable author statement /// 0005739 // mitochondrion // inferred from electronic annotation /// 0005743 // mitochondrial inner membrane // inferred from electronic annotation /// 0005777 // peroxisome // not recorded /// 0005777 // peroxisome // traceable author statement /// 0005777 // peroxisome // inferred from electro…	0004092 // carnitine O-acetyltransferase activity // inferred from direct assay /// 0004092 // carnitine O-acetyltransferase activity // not recorded /// 0004092 // carnitine O-acetyltransferase activity // inferred from electronic annotation /// 0005102 // receptor binding // not recorded /// 0016740 // transferase activity // inferred from electronic annotation /// 0016746 // transferase activi…	Crat	carnitine O-acetyltransferase	8.09292	7.661	7.28466	7.60525	8.04346	8.38239	8.26067	8.2164	0.000952381	168.947	21
1379361_at	0007031 // peroxisome organization // not recorded /// 0007031 // peroxisome organization // inferred from sequence or structural similarity /// 0007031 // peroxisome organization // inferred from electronic annotation /// 0007165 // signal transduction // not recorded /// 0007165 // signal transduction // inferred from sequence or structural similarity /// 0007165 // signal transduction // infer…	0005777 // peroxisome // not recorded /// 0005777 // peroxisome // inferred from electronic annotation /// 0005778 // peroxisomal membrane // inferred from direct assay /// 0005778 // peroxisomal membrane // inferred from electronic annotation /// 0005779 // integral to peroxisomal membrane // not recorded /// 0005779 // integral to peroxisomal membrane // inferred from sequence or structural sim…	---	Pex11a	peroxisomal biogenesis factor 11 alpha	9.71237	9.42197	8.92819	8.87042	9.77651	9.71975	9.75134	9.82395	0.000954545	170.085	22
1398597_at	---	---	---	---	---	7.57662	7.2772	7.28669	6.53349	7.79249	8.08363	7.23197	8.03978	0.000913043	173.523	23
1368475_at	0042135 // neurotransmitter catabolic process // inferred from electronic annotation	0005581 // collagen // inferred from electronic annotation /// 0005605 // basal lamina // traceable author statement /// 0030054 // cell junction // inferred from electronic annotation /// 0045202 // synapse // inferred from electronic annotation	0005198 // structural molecule activity // traceable author statement /// 0008201 // heparin binding // inferred from direct assay	Colq	collagen-like tail subunit (single strand of homotrimer) of asymmetric acetylcholinesterase	7.07097	6.50407	6.39914	6.7803	7.02751	7.28041	7.28694	7.36079	0.000916667	176.966	24
1390255_at	0007010 // cytoskeleton organization // inferred from electronic annotation /// 0045944 // positive regulation of transcription from RNA polymerase II promoter // inferred from electronic annotation	---	0003779 // actin binding // inferred from electronic annotation /// 0008270 // zinc ion binding // inferred from electronic annotation	Ablim3	actin binding LIM protein family, member 3	7.91223	7.57948	7.21883	7.02782	7.85574	7.82477	8.31991	8.06423	0.00104	183.754	25
1373692_at	0045947 // negative regulation of translational initiation // inferred from electronic annotation	---	0008190 // eukaryotic initiation factor 4E binding // inferred from electronic annotation	Eif4ebp3	eukaryotic translation initiation factor 4E binding protein 3	11.2046	10.1007	10.1807	9.6535	10.792	10.833	11.3369	10.5172	0.00103846	186.684	26
1388211_s_at	0000038 // very long-chain fatty acid metabolic process // not recorded /// 0001666 // response to hypoxia // inferred from direct assay /// 0001676 // long-chain fatty acid metabolic process // not recorded /// 0006629 // lipid metabolic process // inferred from electronic annotation /// 0006629 // lipid metabolic process // traceable author statement /// 0006637 // acyl-CoA metabolic process //…	0005737 // cytoplasm // inferred from electronic annotation /// 0005739 // mitochondrion // inferred from direct assay /// 0005739 // mitochondrion // not recorded /// 0005739 // mitochondrion // inferred from electronic annotation /// 0005759 // mitochondrial matrix // inferred from electronic annotation /// 0005829 // cytosol // inferred from direct assay	0004091 // carboxylesterase activity // inferred from electronic annotation /// 0005102 // receptor binding // not recorded /// 0016290 // palmitoyl-CoA hydrolase activity // inferred from direct assay /// 0016290 // palmitoyl-CoA hydrolase activity // inferred from electronic annotation /// 0016787 // hydrolase activity // inferred from electronic annotation /// 0016790 // thiolester hydrolase a…	Acot1 /// Acot2	acyl-CoA thioesterase 1 /// acyl-CoA thioesterase 2	6.94355	6.81625	6.71917	6.93679	7.2387	7.62496	7.24124	7.15872	0.001	186.879	27
1387022_at	0001822 // kidney development // inferred from expression pattern /// 0001889 // liver development // inferred from expression pattern /// 0002072 // optic cup morphogenesis involved in camera-type eye development // inferred from electronic annotation /// 0002072 // optic cup morphogenesis involved in camera-type eye development // not recorded /// 0006979 // response to oxidative stress // infe…	0005625 // soluble fraction // inferred from direct assay /// 0005737 // cytoplasm // inferred from electronic annotation	0001758 // retinal dehydrogenase activity // inferred from direct assay /// 0001758 // retinal dehydrogenase activity // inferred from electronic annotation /// 0004028 // 3-chloroallyl aldehyde dehydrogenase activity // not recorded /// 0004028 // 3-chloroallyl aldehyde dehydrogenase activity // traceable author statement /// 0004028 // 3-chloroallyl aldehyde dehydrogenase activity // inferred f…	Aldh1a1	aldehyde dehydrogenase 1 family, member A1	10.8189	9.54026	9.61005	11.1919	10.6089	11.1396	11.3731	11.0524	0.00107143	191.9	28
1379716_at	---	---	---	---	---	6.71222	7.11647	6.93301	7.21465	7.42436	7.25608	7.66221	7.36469	0.00134483	204.793	29
1388210_at	0000038 // very long-chain fatty acid metabolic process // not recorded /// 0001666 // response to hypoxia // inferred from direct assay /// 0001676 // long-chain fatty acid metabolic process // not recorded /// 0006629 // lipid metabolic process // inferred from electronic annotation /// 0006637 // acyl-CoA metabolic process // inferred from direct assay /// 0006637 // acyl-CoA metabolic process…	0005739 // mitochondrion // inferred from direct assay /// 0005739 // mitochondrion // not recorded /// 0005739 // mitochondrion // inferred from electronic annotation /// 0005759 // mitochondrial matrix // inferred from electronic annotation	0004091 // carboxylesterase activity // inferred from electronic annotation /// 0005102 // receptor binding // not recorded /// 0016290 // palmitoyl-CoA hydrolase activity // inferred from direct assay /// 0016290 // palmitoyl-CoA hydrolase activity // inferred from electronic annotation /// 0016787 // hydrolase activity // inferred from electronic annotation /// 0016790 // thiolester hydrolase a…	Acot2	acyl-CoA thioesterase 2	6.99468	6.75551	6.52229	6.86075	7.11339	7.39977	7.17825	7.24606	0.0014	206.694	30
1390416_at	0006810 // transport // inferred from electronic annotation /// 0006839 // mitochondrial transport // inferred from electronic annotation /// 0055085 // transmembrane transport // inferred from electronic annotation	0005739 // mitochondrion // not recorded /// 0005739 // mitochondrion // inferred from electronic annotation /// 0005743 // mitochondrial inner membrane // inferred from electronic annotation /// 0016020 // membrane // inferred from electronic annotation /// 0016021 // integral to membrane // inferred from electronic annotation /// 0031966 // mitochondrial membrane // inferred from electronic ann…	---	Slc25a30	solute carrier family 25, member 30	12.1468	9.38955	8.88602	11.7398	12.2751	11.5029	11.6328	10.5993	0.0013871	208.024	31
1376051_at	0006631 // fatty acid metabolic process // inferred from electronic annotation /// 0055114 // oxidation-reduction process // inferred from electronic annotation	0005737 // cytoplasm // inferred from electronic annotation /// 0005829 // cytosol // inferred from sequence or structural similarity	0000166 // nucleotide binding // inferred from electronic annotation /// 0003857 // 3-hydroxyacyl-CoA dehydrogenase activity // inferred from electronic annotation /// 0016491 // oxidoreductase activity // inferred from electronic annotation /// 0016616 // oxidoreductase activity, acting on the CH-OH group of donors, NAD or NADP as acceptor // inferred from electronic annotation /// 0042803 // pr…	Cryl1	crystallin, lambda 1	7.65209	7.5364	7.31553	7.3788	7.85629	7.98303	7.91805	7.85904	0.001375	209.341	32
1370024_at	0001964 // startle response // not recorded /// 0001964 // startle response // inferred from electronic annotation /// 0006810 // transport // inferred from electronic annotation /// 0021846 // cell proliferation in forebrain // inferred from electronic annotation /// 0021846 // cell proliferation in forebrain // not recorded /// 0022008 // neurogenesis // inferred from electronic annotation /// …	0005634 // nucleus // inferred from direct assay /// 0005737 // cytoplasm // inferred from direct assay /// 0005737 // cytoplasm // inferred from electronic annotation /// 0042995 // cell projection // inferred from electronic annotation /// 0042995 // cell projection // not recorded /// 0043025 // neuronal cell body // inferred from electronic annotation /// 0043025 // neuronal cell body // not …	0005215 // transporter activity // inferred from electronic annotation /// 0005504 // fatty acid binding // traceable author statement /// 0008289 // lipid binding // inferred from electronic annotation	Fabp7	fatty acid binding protein 7, brain	11.9958	11.6018	11.6166	11.8536	12.3208	12.0903	12.3382	12.0725	0.00133333	210.472	33
1379437_at	---	---	---	---	---	9.26218	8.83473	8.80407	9.0453	9.5607	9.46248	9.51114	9.25298	0.00173529	227.239	34
1367950_at	0006810 // transport // inferred from electronic annotation /// 0006811 // ion transport // inferred from electronic annotation /// 0006814 // sodium ion transport // inferred from electronic annotation /// 0007005 // mitochondrion organization // not recorded /// 0007512 // adult heart development // not recorded /// 0007626 // locomotory behavior // not recorded /// 0009437 // carnitine metabol…	0016020 // membrane // inferred from electronic annotation /// 0016021 // integral to membrane // non-traceable author statement /// 0016021 // integral to membrane // inferred from electronic annotation /// 0016323 // basolateral plasma membrane // inferred from direct assay /// 0016324 // apical plasma membrane // inferred from electronic annotation /// 0016324 // apical plasma membrane // not …	0000166 // nucleotide binding // inferred from electronic annotation /// 0005215 // transporter activity // inferred from electronic annotation /// 0005524 // ATP binding // inferred from electronic annotation /// 0015075 // ion transmembrane transporter activity // inferred from electronic annotation /// 0015226 // carnitine transporter activity // inferred from direct assay /// 0015226 // carni…	Slc22a5	solute carrier family 22 (organic cation/carnitine transporter), member 5	8.67336	8.29829	8.15996	7.82544	8.6413	8.49884	8.80305	9.09889	0.00191429	232.167	35
1378169_at	0000038 // very long-chain fatty acid metabolic process // not recorded /// 0000038 // very long-chain fatty acid metabolic process // inferred from electronic annotation /// 0001676 // long-chain fatty acid metabolic process // not recorded /// 0001676 // long-chain fatty acid metabolic process // inferred from electronic annotation /// 0006104 // succinyl-CoA metabolic process // not recorded /…	0005777 // peroxisome // not recorded /// 0005829 // cytosol // not recorded /// 0005829 // cytosol // inferred from electronic annotation	0005102 // receptor binding // not recorded /// 0016290 // palmitoyl-CoA hydrolase activity // inferred from electronic annotation /// 0016790 // thiolester hydrolase activity // inferred from electronic annotation /// 0047617 // acyl-CoA hydrolase activity // not recorded /// 0047617 // acyl-CoA hydrolase activity // inferred from electronic annotation	Acot3 /// Acot4	acyl-CoA thioesterase 3 /// acyl-CoA thioesterase 4	7.02379	6.87975	6.73099	6.82928	7.209	7.43518	7.23469	7.22608	0.00191667	234.825	36
1371012_at	0001561 // fatty acid alpha-oxidation // inferred from direct assay /// 0001561 // fatty acid alpha-oxidation // not recorded /// 0001561 // fatty acid alpha-oxidation // inferred from electronic annotation /// 0006629 // lipid metabolic process // not recorded /// 0006629 // lipid metabolic process // inferred from electronic annotation /// 0006631 // fatty acid metabolic process // inferred fro…	0005777 // peroxisome // inferred from direct assay /// 0005777 // peroxisome // not recorded /// 0005777 // peroxisome // inferred from electronic annotation	0000287 // magnesium ion binding // inferred from electronic annotation /// 0003824 // catalytic activity // inferred from electronic annotation /// 0005102 // receptor binding // not recorded /// 0016829 // lyase activity // not recorded /// 0016829 // lyase activity // inferred from electronic annotation /// 0016830 // carbon-carbon lyase activity // inferred from direct assay /// 0016830 // ca…	Hacl1	2-hydroxyacyl-CoA lyase 1	12.3946	11.3739	11.2983	11.071	12.0138	12.0744	12.3271	11.8689	0.00208108	243.334	37
1383956_at	---	0005615 // extracellular space // inferred from electronic annotation	0004866 // endopeptidase inhibitor activity // inferred from electronic annotation	RGD1565709	similar to ovostatin-2	5.89135	6.45125	6.46155	5.75918	6.94965	5.93111	6.87767	6.51444	0.00205263	244.037	38
1377457_a_at	0008283 // cell proliferation // inferred from expression pattern /// 0016477 // cell migration // inferred from mutant phenotype	0005771 // multivesicular body // inferred from direct assay /// 0043025 // neuronal cell body // inferred from direct assay /// 0048471 // perinuclear region of cytoplasm // inferred from direct assay	---	Sorl1	sortilin-related receptor, LDLR class A repeats-containing	7.5228	7.43901	7.44769	7.6931	7.77638	8.06166	7.98056	7.85595	0.00202564	244.929	39
1380577_at	0006200 // ATP catabolic process // inferred from electronic annotation /// 0006810 // transport // inferred from electronic annotation /// 0006855 // drug transmembrane transport // inferred from direct assay /// 0010039 // response to iron ion // inferred from expression pattern /// 0015893 // drug transport // inferred from direct assay /// 0046415 // urate metabolic process // not recorded //…	0005624 // membrane fraction // inferred from direct assay /// 0005634 // nucleus // inferred from direct assay /// 0005886 // plasma membrane // inferred from electronic annotation /// 0016020 // membrane // inferred from electronic annotation /// 0016021 // integral to membrane // inferred from electronic annotation /// 0016324 // apical plasma membrane // inferred from direct assay	0000166 // nucleotide binding // inferred from electronic annotation /// 0005524 // ATP binding // inferred from electronic annotation /// 0015238 // drug transmembrane transporter activity // inferred from direct assay /// 0016887 // ATPase activity // inferred from electronic annotation /// 0017111 // nucleoside-triphosphatase activity // inferred from electronic annotation /// 0042626 // ATPas…	Abcg2	ATP-binding cassette, subfamily G (WHITE), member 2	7.68844	7.88143	7.99801	7.97577	8.19984	8.4892	8.22715	8.1709	0.0021	246.975	40
1367794_at	0001869 // negative regulation of complement activation, lectin pathway // inferred from electronic annotation /// 0001869 // negative regulation of complement activation, lectin pathway // not recorded /// 0006953 // acute-phase response // inferred from expression pattern /// 0006953 // acute-phase response // inferred from electronic annotation /// 0006954 // inflammatory response // traceable…	0005576 // extracellular region // inferred from electronic annotation /// 0005615 // extracellular space // inferred from electronic annotation	0004866 // endopeptidase inhibitor activity // non-traceable author statement /// 0004866 // endopeptidase inhibitor activity // inferred from electronic annotation /// 0004867 // serine-type endopeptidase inhibitor activity // inferred from electronic annotation /// 0004867 // serine-type endopeptidase inhibitor activity // not recorded /// 0005102 // receptor binding // traceable author stateme…	A2m	alpha-2-macroglobulin	6.27618	7.26651	6.90588	7.09566	7.44624	7.17158	7.65526	7.21821	0.0022439	251.811	41
1393971_at	---	---	---	---	---	8.14472	6.03685	6.0502	7.30916	8.05512	7.71409	7.49637	7.03778	0.00230952	256.691	42
1374752_at	0007257 // activation of JUN kinase activity // inferred from electronic annotation /// 0007257 // activation of JUN kinase activity // not recorded /// 0030111 // regulation of Wnt receptor signaling pathway // inferred from electronic annotation /// 0030111 // regulation of Wnt receptor signaling pathway // not recorded /// 0042308 // negative regulation of protein import into nucleus // inferr…	0005634 // nucleus // not recorded /// 0005634 // nucleus // inferred from electronic annotation /// 0005730 // nucleolus // inferred from electronic annotation /// 0005730 // nucleolus // not recorded /// 0005737 // cytoplasm // not recorded /// 0005737 // cytoplasm // inferred from electronic annotation /// 0005794 // Golgi apparatus // inferred from electronic annotation /// 0005794 // Golgi a…	0008134 // transcription factor binding // not recorded /// 0008134 // transcription factor binding // inferred from electronic annotation /// 0030332 // cyclin binding // inferred from electronic annotation /// 0030332 // cyclin binding // not recorded /// 0030957 // Tat protein binding // inferred from electronic annotation /// 0030957 // Tat protein binding // not recorded	Mdfic	MyoD family inhibitor domain containing	10.1373	9.52485	9.34902	9.34043	10.3054	10.2243	10.0036	9.70702	0.00225581	258.181	43
1375979_at	---	---	---	---	---	8.76674	8.51477	8.26753	8.22941	9.14986	8.76397	8.81423	8.79479	0.00238636	263.677	44
1371131_a_at	0000122 // negative regulation of transcription from RNA polymerase II promoter // not recorded /// 0006351 // transcription, DNA-dependent // inferred from electronic annotation /// 0006355 // regulation of transcription, DNA-dependent // inferred from electronic annotation /// 0006606 // protein import into nucleus // inferred from electronic annotation /// 0006606 // protein import into nucleu…	0005634 // nucleus // inferred from direct assay /// 0005737 // cytoplasm // inferred from direct assay /// 0005737 // cytoplasm // not recorded /// 0005737 // cytoplasm // inferred from electronic annotation /// 0005758 // mitochondrial intermembrane space // inferred from direct assay	0004857 // enzyme inhibitor activity // inferred from electronic annotation /// 0004857 // enzyme inhibitor activity // not recorded /// 0031625 // ubiquitin protein ligase binding // inferred from electronic annotation /// 0031625 // ubiquitin protein ligase binding // not recorded	Txnip	thioredoxin interacting protein	10.2351	9.78523	9.59261	10.1843	10.1904	10.6246	10.5166	10.2368	0.00282222	277.227	45
1377730_at	---	0016021 // integral to membrane // inferred from electronic annotation /// 0030133 // transport vesicle // inferred from electronic annotation /// 0030133 // transport vesicle // not recorded	---	RGD1310769	similar to HSPC288	9.06249	8.87312	8.90285	8.74939	9.16069	9.24365	9.28859	9.40829	0.00291304	283.424	46
1388924_at	0001525 // angiogenesis // inferred from electronic annotation /// 0001666 // response to hypoxia // inferred from expression pattern /// 0007165 // signal transduction // inferred from electronic annotation /// 0007275 // multicellular organismal development // inferred from electronic annotation /// 0019216 // regulation of lipid metabolic process // traceable author statement /// 0030154 // ce…	0005576 // extracellular region // not recorded /// 0005576 // extracellular region // inferred from electronic annotation /// 0005578 // proteinaceous extracellular matrix // inferred from electronic annotation /// 0005615 // extracellular space // inferred from electronic annotation /// 0005615 // extracellular space // not recorded	0004857 // enzyme inhibitor activity // not recorded /// 0004857 // enzyme inhibitor activity // traceable author statement /// 0004857 // enzyme inhibitor activity // inferred from electronic annotation /// 0005102 // receptor binding // inferred from electronic annotation	Angptl4	angiopoietin-like 4	11.417	11.4282	11.1121	10.9155	11.6315	11.7237	11.4711	11.577	0.00321277	291.335	47
1387760_a_at	0001889 // liver development // not recorded /// 0001889 // liver development // inferred from electronic annotation /// 0001952 // regulation of cell-matrix adhesion // not recorded /// 0001952 // regulation of cell-matrix adhesion // inferred from electronic annotation /// 0002064 // epithelial cell development // not recorded /// 0002064 // epithelial cell development // inferred from electron…	0005634 // nucleus // inferred from direct assay /// 0005634 // nucleus // inferred from electronic annotation /// 0005634 // nucleus // not recorded	0001077 // RNA polymerase II core promoter proximal region sequence-specific DNA binding transcription factor activity involved in positive regulation of transcription // inferred from direct assay /// 0003677 // DNA binding // inferred from mutant phenotype /// 0003677 // DNA binding // not recorded /// 0003677 // DNA binding // inferred from electronic annotation /// 0003700 // sequence-specifi…	Onecut1	one cut homeobox 1	9.61865	5.79181	6.22345	8.65606	9.15159	8.61405	8.39397	7.24157	0.0031875	292.003	48
1367659_s_at	0006629 // lipid metabolic process // inferred from electronic annotation /// 0006631 // fatty acid metabolic process // inferred from electronic annotation /// 0006635 // fatty acid beta-oxidation // inferred from electronic annotation /// 0006635 // fatty acid beta-oxidation // not recorded /// 0006635 // fatty acid beta-oxidation // traceable author statement /// 0008152 // metabolic process /…	0005739 // mitochondrion // inferred from direct assay /// 0005739 // mitochondrion // not recorded /// 0005739 // mitochondrion // traceable author statement /// 0005739 // mitochondrion // inferred from electronic annotation /// 0005743 // mitochondrial inner membrane // inferred from electronic annotation /// 0005743 // mitochondrial inner membrane // not recorded /// 0005759 // mitochondrial …	0003824 // catalytic activity // inferred from electronic annotation /// 0004165 // dodecenoyl-CoA delta-isomerase activity // inferred from direct assay /// 0004165 // dodecenoyl-CoA delta-isomerase activity // inferred from electronic annotation /// 0004165 // dodecenoyl-CoA delta-isomerase activity // not recorded /// 0016853 // isomerase activity // inferred from electronic annotation /// 004…	Eci1	enoyl-CoA delta isomerase 1	11.6745	11.0806	10.982	11.5232	11.6449	11.7713	11.8136	11.7793	0.00330612	296.41	49
1381973_at	0006810 // transport // inferred from electronic annotation /// 0006839 // mitochondrial transport // inferred from electronic annotation /// 0055085 // transmembrane transport // inferred from electronic annotation	0005739 // mitochondrion // not recorded /// 0005739 // mitochondrion // inferred from electronic annotation /// 0005743 // mitochondrial inner membrane // inferred from electronic annotation /// 0016020 // membrane // inferred from electronic annotation /// 0016021 // integral to membrane // inferred from electronic annotation /// 0031966 // mitochondrial membrane // inferred from electronic ann…	---	Slc25a30	solute carrier family 25, member 30	9.32033	6.78523	6.30016	8.93314	9.56305	8.11128	8.26867	7.48524	0.00354	303.42	50
1374187_at	---	---	---	---	---	6.23861	5.9565	5.88643	6.1354	6.35367	6.47239	6.48356	6.33914	0.00394118	310.349	51
1392274_at	---	---	---	---	---	7.98403	7.42591	7.42732	7.56736	8.37486	8.04631	7.79048	7.90311	0.004	311.667	52
1371143_at	0007568 // aging // inferred from expression pattern /// 0009791 // post-embryonic development // inferred from direct assay /// 0010951 // negative regulation of endopeptidase activity // not recorded /// 0030162 // regulation of proteolysis // not recorded /// 0031667 // response to nutrient levels // inferred from expression pattern /// 0033189 // response to vitamin A // inferred from direct …	0005576 // extracellular region // inferred from electronic annotation /// 0005615 // extracellular space // inferred from direct assay /// 0005615 // extracellular space // traceable author statement	0004867 // serine-type endopeptidase inhibitor activity // not recorded /// 0004867 // serine-type endopeptidase inhibitor activity // inferred from electronic annotation /// 0015349 // thyroid hormone transmembrane transporter activity // traceable author statement /// 0042562 // hormone binding // inferred from direct assay	Serpina7	serpin peptidase inhibitor, clade A (alpha-1 antiproteinase, antitrypsin), member 7	7.26343	6.00005	6.65308	6.98404	7.08296	7.52069	7.43415	6.97289	0.00426415	314.51	53
1392485_at	---	---	---	RGD1564804	similar to chromosome 1 open reading frame 50	8.88957	8.7903	8.87622	8.63772	9.11759	9.21716	9.28513	8.9513	0.00433333	318.198	54
1386611_at	---	0005737 // cytoplasm // inferred from electronic annotation /// 0030424 // axon // inferred from electronic annotation /// 0042995 // cell projection // inferred from electronic annotation /// 0043204 // perikaryon // inferred from electronic annotation	---	Klhl24	kelch-like 24 (Drosophila)	8.22323	7.94271	7.73045	7.93735	8.34344	8.30365	8.33105	8.30354	0.00427273	318.594	55
1370698_at	0006805 // xenobiotic metabolic process // not recorded /// 0008152 // metabolic process // not recorded /// 0008152 // metabolic process // inferred from electronic annotation /// 0017144 // drug metabolic process // traceable author statement /// 0032496 // response to lipopolysaccharide // inferred from expression pattern /// 0070980 // biphenyl catabolic process // inferred from direct assay …	0005783 // endoplasmic reticulum // not recorded /// 0005783 // endoplasmic reticulum // inferred from electronic annotation /// 0005789 // endoplasmic reticulum membrane // inferred from electronic annotation /// 0005792 // microsome // inferred from direct assay /// 0005792 // microsome // inferred from electronic annotation /// 0016020 // membrane // inferred from electronic annotation /// 001…	0015020 // glucuronosyltransferase activity // inferred from direct assay /// 0015020 // glucuronosyltransferase activity // inferred from mutant phenotype /// 0015020 // glucuronosyltransferase activity // inferred from electronic annotation /// 0016740 // transferase activity // inferred from electronic annotation /// 0016757 // transferase activity, transferring glycosyl groups // inferred fro…	Ugt2b1	UDP glucuronosyltransferase 2 family, polypeptide B1	8.88597	8.5525	8.74247	9.62716	9.19604	9.81366	9.49918	8.96011	0.00428571	320.671	56
1368426_at	0001579 // medium-chain fatty acid transport // traceable author statement /// 0006091 // generation of precursor metabolites and energy // not recorded /// 0006091 // generation of precursor metabolites and energy // inferred from sequence or structural similarity /// 0006629 // lipid metabolic process // inferred from electronic annotation /// 0006631 // fatty acid metabolic process // not reco…	0005625 // soluble fraction // inferred from direct assay /// 0005739 // mitochondrion // inferred from electronic annotation /// 0005739 // mitochondrion // not recorded /// 0005777 // peroxisome // inferred from direct assay /// 0005777 // peroxisome // inferred from electronic annotation /// 0005777 // peroxisome // not recorded /// 0043231 // intracellular membrane-bounded organelle // not re…	0005102 // receptor binding // not recorded /// 0008458 // carnitine O-octanoyltransferase activity // inferred from direct assay /// 0008458 // carnitine O-octanoyltransferase activity // inferred from electronic annotation /// 0008458 // carnitine O-octanoyltransferase activity // not recorded /// 0008458 // carnitine O-octanoyltransferase activity // traceable author statement /// 0016740 // t…	Crot	carnitine O-octanoyltransferase	10.6358	10.4014	10.2582	10.6355	10.6892	10.8707	10.7293	11.1062	0.00424561	321.134	57
1367774_at	0006749 // glutathione metabolic process // not recorded /// 0007568 // aging // inferred from expression pattern /// 0008152 // metabolic process // inferred from electronic annotation /// 0031667 // response to nutrient levels // inferred from expression pattern /// 0042178 // xenobiotic catabolic process // inferred from direct assay /// 0042493 // response to drug // non-traceable author stat…	0005634 // nucleus // inferred from direct assay /// 0005640 // nuclear outer membrane // inferred from direct assay /// 0005737 // cytoplasm // inferred from electronic annotation /// 0005829 // cytosol // inferred from direct assay	0004364 // glutathione transferase activity // inferred from direct assay /// 0004364 // glutathione transferase activity // not recorded /// 0004364 // glutathione transferase activity // inferred from electronic annotation /// 0008144 // drug binding // inferred from direct assay /// 0016740 // transferase activity // inferred from electronic annotation /// 0043295 // glutathione binding // inf…	Gsta3	glutathione S-transferase A3	12.284	12.1029	12.1598	12.2719	12.5978	12.3027	12.5952	12.7069	0.00424138	322.844	58
1374555_at	---	0005634 // nucleus // inferred from electronic annotation /// 0005634 // nucleus // not recorded /// 0005730 // nucleolus // not recorded /// 0005737 // cytoplasm // inferred from electronic annotation /// 0005737 // cytoplasm // not recorded	0000062 // fatty-acyl-CoA binding // inferred from electronic annotation /// 0008289 // lipid binding // inferred from electronic annotation	Acbd6	acyl-CoA binding domain containing 6	7.7456	7.62221	7.57938	7.74667	7.87045	8.0731	8.093	8.02868	0.00422034	323.764	59
1394948_at	---	---	---	---	---	9.48047	9.59461	9.51601	9.84731	9.75903	9.90679	9.98382	10.2842	0.0042	324.633	60
1372213_at	---	0005739 // mitochondrion // inferred from electronic annotation /// 0005739 // mitochondrion // not recorded	---	LOC500300	similar to hypothetical protein MGC6835	9.25945	9.95972	9.84519	8.92969	9.83878	10.4651	9.40443	10.1067	0.00422951	326.918	61
1385723_at	---	---	---	---	---	6.83486	7.02479	6.92222	6.8993	6.92189	7.69244	7.47833	7.23518	0.00416129	327.466	62
1385053_at	---	---	---	---	---	7.89108	7.45047	7.28896	7.62115	8.01804	8.14776	7.95088	7.64761	0.00455556	336.197	63
1386946_at	0001676 // long-chain fatty acid metabolic process // inferred from mutant phenotype /// 0001676 // long-chain fatty acid metabolic process // traceable author statement /// 0006006 // glucose metabolic process // inferred from mutant phenotype /// 0006629 // lipid metabolic process // inferred from electronic annotation /// 0006631 // fatty acid metabolic process // inferred from electronic anno…	0005739 // mitochondrion // inferred from direct assay /// 0005739 // mitochondrion // not recorded /// 0005739 // mitochondrion // inferred from electronic annotation /// 0005741 // mitochondrial outer membrane // inferred from direct assay /// 0005741 // mitochondrial outer membrane // inferred from electronic annotation /// 0005743 // mitochondrial inner membrane // inferred from electronic an…	0004095 // carnitine O-palmitoyltransferase activity // inferred from direct assay /// 0004095 // carnitine O-palmitoyltransferase activity // inferred from mutant phenotype /// 0004095 // carnitine O-palmitoyltransferase activity // traceable author statement /// 0004095 // carnitine O-palmitoyltransferase activity // inferred from electronic annotation /// 0005515 // protein binding // inferred…	Cpt1a	carnitine palmitoyltransferase 1a, liver	12.1312	11.8991	11.5558	11.5498	12.0668	12.1352	12.2239	12.2832	0.00478125	341.008	64
1386261_x_at	0001937 // negative regulation of endothelial cell proliferation // not recorded /// 0001937 // negative regulation of endothelial cell proliferation // inferred from sequence or structural similarity /// 0001937 // negative regulation of endothelial cell proliferation // inferred from electronic annotation /// 0006906 // vesicle fusion // not recorded /// 0006906 // vesicle fusion // inferred fr…	0000139 // Golgi membrane // inferred from electronic annotation /// 0002080 // acrosomal membrane // inferred from electronic annotation /// 0002080 // acrosomal membrane // not recorded /// 0005622 // intracellular // not recorded /// 0005622 // intracellular // inferred from electronic annotation /// 0005624 // membrane fraction // inferred from direct assay /// 0005624 // membrane fraction //…	0000149 // SNARE binding // inferred from direct assay /// 0005515 // protein binding // inferred from physical interaction /// 0019905 // syntaxin binding // inferred from direct assay /// 0031748 // D1 dopamine receptor binding // not recorded /// 0031748 // D1 dopamine receptor binding // inferred from sequence or structural similarity /// 0031748 // D1 dopamine receptor binding // inferred fr…	Cav2 /// LOC100362824	caveolin 2 /// caveolin 2-like	6.55881	6.64072	6.5508	7.2103	7.01683	7.59943	7.06077	6.90014	0.00472308	341.97	65
1385729_at	---	---	---	---	---	6.99759	6.77646	6.49088	6.5284	7.14321	7.10287	6.95216	7.12712	0.00483333	345.241	66
1391718_at	---	---	---	---	---	7.76458	6.26691	6.25736	7.99113	8.51912	8.04176	7.02197	6.27899	0.00502985	351.94	67
1367759_at	0006334 // nucleosome assembly // inferred from electronic annotation	0000786 // nucleosome // inferred from electronic annotation /// 0000790 // nuclear chromatin // inferred from electronic annotation /// 0000790 // nuclear chromatin // not recorded /// 0005634 // nucleus // not recorded /// 0005634 // nucleus // inferred from electronic annotation /// 0005694 // chromosome // inferred from electronic annotation /// 0005794 // Golgi apparatus // inferred from ele…	0003677 // DNA binding // inferred from electronic annotation	H1f0	H1 histone family, member 0	8.42707	8.50021	8.69483	8.48928	8.69333	8.91324	8.86919	9.03009	0.00501471	352.502	68
1391154_at	---	---	---	---	---	7.41893	6.95091	6.34893	6.76168	7.18042	7.17666	7.55147	7.41543	0.00497101	353.217	69
1372868_at	0051085 // chaperone mediated protein folding requiring cofactor // inferred from electronic annotation	0005737 // cytoplasm // inferred from electronic annotation /// 0005783 // endoplasmic reticulum // inferred from electronic annotation /// 0005788 // endoplasmic reticulum lumen // not recorded	0000166 // nucleotide binding // inferred from electronic annotation /// 0003855 // 3-dehydroquinate dehydratase activity // inferred from electronic annotation /// 0005524 // ATP binding // inferred from electronic annotation	Tor3a	torsin family 3, member A	6.64115	7.29256	6.81308	6.19672	6.83873	6.77283	7.08949	7.9966	0.00508571	358.079	70
1382496_at	0006351 // transcription, DNA-dependent // inferred from electronic annotation /// 0006355 // regulation of transcription, DNA-dependent // inferred from direct assay /// 0006355 // regulation of transcription, DNA-dependent // inferred from mutant phenotype /// 0006355 // regulation of transcription, DNA-dependent // not recorded /// 0006355 // regulation of transcription, DNA-dependent // trace…	0005634 // nucleus // inferred from direct assay /// 0005634 // nucleus // not recorded /// 0005634 // nucleus // inferred from electronic annotation /// 0005667 // transcription factor complex // inferred from direct assay /// 0005737 // cytoplasm // inferred from direct assay /// 0005737 // cytoplasm // not recorded /// 0005737 // cytoplasm // inferred from electronic annotation	0000062 // fatty-acyl-CoA binding // inferred from physical interaction /// 0001077 // RNA polymerase II core promoter proximal region sequence-specific DNA binding transcription factor activity involved in positive regulation of transcription // inferred from direct assay /// 0003677 // DNA binding // inferred from direct assay /// 0003677 // DNA binding // not recorded /// 0003677 // DNA bindin…	Hnf4a	Hepatocyte nuclear factor 4, alpha	7.68562	7.23359	7.09303	7.0248	7.66053	7.65554	7.67946	7.85734	0.00528169	362.862	71
1381269_at	---	---	---	---	---	7.02703	7.0855	7.18007	7.19112	7.14308	7.43967	7.53191	7.94246	0.00523611	363.283	72
1394844_s_at	0001822 // kidney development // inferred from expression pattern /// 0009725 // response to hormone stimulus // inferred from expression pattern /// 0019369 // arachidonic acid metabolic process // inferred from mutant phenotype /// 0019369 // arachidonic acid metabolic process // traceable author statement /// 0042493 // response to drug // inferred from expression pattern /// 0043651 // linole…	0005783 // endoplasmic reticulum // inferred from electronic annotation /// 0005789 // endoplasmic reticulum membrane // inferred from electronic annotation /// 0005792 // microsome // inferred from direct assay /// 0005792 // microsome // inferred from electronic annotation /// 0016020 // membrane // inferred from electronic annotation	0004497 // monooxygenase activity // inferred from electronic annotation /// 0005504 // fatty acid binding // inferred from direct assay /// 0005506 // iron ion binding // inferred from electronic annotation /// 0008391 // arachidonic acid monooxygenase activity // inferred from mutant phenotype /// 0008405 // arachidonic acid 11,12-epoxygenase activity // traceable author statement /// 0009055 /…	Cyp4a2 /// Cyp4a3	cytochrome P450, family 4, subfamily a, polypeptide 2 /// cytochrome P450, family 4, subfamily a, polypeptide 3	11.6155	11.6982	11.5657	11.4718	11.9331	11.7861	11.9713	11.911	0.00549315	369.26	73
1376813_at	0006644 // phospholipid metabolic process // inferred from electronic annotation /// 0008654 // phospholipid biosynthetic process // inferred from electronic annotation	0005783 // endoplasmic reticulum // inferred from electronic annotation /// 0005789 // endoplasmic reticulum membrane // inferred from electronic annotation /// 0016020 // membrane // inferred from electronic annotation /// 0016021 // integral to membrane // inferred from electronic annotation	0016740 // transferase activity // inferred from electronic annotation /// 0016746 // transferase activity, transferring acyl groups // inferred from electronic annotation /// 0047184 // 1-acylglycerophosphocholine O-acyltransferase activity // inferred from electronic annotation	Lpcat3	lysophosphatidylcholine acyltransferase 3	9.22724	9.44972	9.49069	9.31996	9.6696	9.65399	9.62779	9.73391	0.00548649	371.774	74
1393309_at	---	---	---	---	---	7.99496	7.7542	7.64431	7.82795	8.11471	8.07078	8.1435	8.18491	0.00588	380.206	75
1384842_s_at	0001666 // response to hypoxia // inferred from expression pattern /// 0002377 // immunoglobulin production // inferred from electronic annotation /// 0002377 // immunoglobulin production // not recorded /// 0003014 // renal system process // inferred from electronic annotation /// 0003014 // renal system process // not recorded /// 0006915 // apoptotic process // not recorded /// 0006915 // apop…	0005576 // extracellular region // inferred from electronic annotation /// 0005576 // extracellular region // not recorded /// 0005634 // nucleus // inferred from electronic annotation /// 0005634 // nucleus // not recorded /// 0005737 // cytoplasm // not recorded /// 0005737 // cytoplasm // inferred from electronic annotation /// 0005886 // plasma membrane // not recorded /// 0005886 // plasma m…	0004872 // receptor activity // traceable author statement /// 0004872 // receptor activity // inferred from electronic annotation /// 0004888 // transmembrane signaling receptor activity // non-traceable author statement /// 0004888 // transmembrane signaling receptor activity // inferred from electronic annotation /// 0005031 // tumor necrosis factor-activated receptor activity // inferred from…	Fas	Fas (TNF receptor superfamily, member 6)	6.90752	6.86412	6.80784	6.94183	7.10507	7.18284	7.11127	7.35693	0.00594737	381.579	76
1391534_at	0000038 // very long-chain fatty acid metabolic process // not recorded /// 0000038 // very long-chain fatty acid metabolic process // inferred from electronic annotation /// 0034626 // fatty acid elongation, polyunsaturated fatty acid // inferred from electronic annotation /// 0034626 // fatty acid elongation, polyunsaturated fatty acid // not recorded /// 0042761 // very long-chain fatty acid b…	0005783 // endoplasmic reticulum // inferred from electronic annotation /// 0005783 // endoplasmic reticulum // not recorded /// 0005792 // microsome // inferred from electronic annotation /// 0016021 // integral to membrane // inferred from electronic annotation	0009922 // fatty acid elongase activity // inferred from electronic annotation /// 0009922 // fatty acid elongase activity // not recorded /// 0016747 // transferase activity, transferring acyl groups other than amino-acyl groups // not recorded /// 0016747 // transferase activity, transferring acyl groups other than amino-acyl groups // inferred from electronic annotation	Elovl2	elongation of very long chain fatty acids (FEN1/Elo2, SUR4/Elo3, yeast)-like 2	9.53801	9.49843	9.52092	9.60798	9.76671	9.75607	9.96908	9.89383	0.00598701	384.275	77
1387740_at	0007031 // peroxisome organization // not recorded /// 0007031 // peroxisome organization // inferred from sequence or structural similarity /// 0007031 // peroxisome organization // inferred from electronic annotation /// 0007165 // signal transduction // not recorded /// 0007165 // signal transduction // inferred from sequence or structural similarity /// 0007165 // signal transduction // infer…	0005777 // peroxisome // not recorded /// 0005777 // peroxisome // inferred from electronic annotation /// 0005778 // peroxisomal membrane // inferred from direct assay /// 0005778 // peroxisomal membrane // inferred from electronic annotation /// 0005779 // integral to peroxisomal membrane // not recorded /// 0005779 // integral to peroxisomal membrane // inferred from sequence or structural sim…	---	Pex11a	peroxisomal biogenesis factor 11 alpha	7.26781	6.97719	6.69505	6.52796	7.16375	7.35024	7.29771	7.24941	0.006	386.286	78
1388666_at	---	---	---	Enc1	ectodermal-neural cortex 1	7.46793	7.49956	7.27186	7.19976	7.44308	8.23682	7.83683	7.51271	0.00631646	393.106	79
1372953_at	---	0005622 // intracellular // not recorded /// 0005624 // membrane fraction // inferred from direct assay /// 0005829 // cytosol // inferred from direct assay	0003779 // actin binding // inferred from direct assay /// 0003779 // actin binding // not recorded /// 0005509 // calcium ion binding // inferred from electronic annotation /// 0005515 // protein binding // inferred from physical interaction /// 0015631 // tubulin binding // not recorded /// 0030276 // clathrin binding // not recorded /// 0043014 // alpha-tubulin binding // inferred from direct …	Ncald	neurocalcin delta	8.04783	7.86271	7.55157	7.30364	8.14674	7.92658	8.32054	7.92449	0.0062875	394.336	80
1369663_at	0002539 // prostaglandin production involved in inflammatory response // inferred from mutant phenotype /// 0006954 // inflammatory response // inferred from mutant phenotype /// 0008152 // metabolic process // inferred from electronic annotation /// 0009636 // response to toxin // inferred from electronic annotation /// 0019233 // sensory perception of pain // inferred from mutant phenotype /// …	0005730 // nucleolus // not recorded /// 0005737 // cytoplasm // not recorded /// 0005737 // cytoplasm // inferred from electronic annotation /// 0005777 // peroxisome // inferred from direct assay /// 0005777 // peroxisome // traceable author statement /// 0005777 // peroxisome // inferred from electronic annotation /// 0005794 // Golgi apparatus // not recorded /// 0005829 // cytosol // inferre…	0000287 // magnesium ion binding // inferred from mutant phenotype /// 0000287 // magnesium ion binding // not recorded /// 0003824 // catalytic activity // inferred from electronic annotation /// 0003869 // 4-nitrophenylphosphatase activity // inferred from direct assay /// 0004301 // epoxide hydrolase activity // inferred from direct assay /// 0004301 // epoxide hydrolase activity // not record…	Ephx2	epoxide hydrolase 2, cytoplasmic	10.1121	9.87586	9.07566	10.0351	10.0581	10.3253	10.3576	10.1031	0.00641975	399.926	81
1387396_at	0006879 // cellular iron ion homeostasis // inferred from direct assay /// 0006879 // cellular iron ion homeostasis // not recorded /// 0006879 // cellular iron ion homeostasis // inferred from electronic annotation /// 0042742 // defense response to bacterium // inferred from electronic annotation /// 0042742 // defense response to bacterium // not recorded /// 0050832 // defense response to fun…	0005576 // extracellular region // inferred from electronic annotation /// 0005576 // extracellular region // not recorded /// 0005737 // cytoplasm // inferred from direct assay /// 0045179 // apical cortex // inferred from direct assay	0005179 // hormone activity // inferred from electronic annotation	Hamp	hepcidin antimicrobial peptide	10.7078	9.49182	9.28905	10.452	10.8176	10.3508	10.4357	10.5892	0.00639024	400.317	82
1379001_at	---	---	---	---	---	7.08804	6.57253	6.79419	6.73544	7.37232	7.02514	6.98508	7.29853	0.00636145	400.935	83
1388628_at	0006810 // transport // inferred from electronic annotation /// 0015031 // protein transport // inferred from electronic annotation	0005783 // endoplasmic reticulum // not recorded /// 0005783 // endoplasmic reticulum // inferred from sequence or structural similarity /// 0005783 // endoplasmic reticulum // inferred from electronic annotation /// 0005789 // endoplasmic reticulum membrane // inferred from electronic annotation /// 0005793 // endoplasmic reticulum-Golgi intermediate compartment // not recorded /// 0005793 // en…	---	Tmed3	transmembrane emp24 protein transport domain containing 3	8.59663	8.68926	8.72184	8.25688	8.85919	8.86599	8.88809	8.84746	0.00660714	404.966	84
1372777_at	---	---	---	---	---	8.77641	8.54921	8.29964	8.37691	8.94094	8.83705	8.6586	8.93676	0.0066	405.848	85
1390800_a_at	0001937 // negative regulation of endothelial cell proliferation // not recorded /// 0001937 // negative regulation of endothelial cell proliferation // inferred from sequence or structural similarity /// 0001937 // negative regulation of endothelial cell proliferation // inferred from electronic annotation /// 0006906 // vesicle fusion // not recorded /// 0006906 // vesicle fusion // inferred fr…	0000139 // Golgi membrane // inferred from electronic annotation /// 0002080 // acrosomal membrane // inferred from electronic annotation /// 0002080 // acrosomal membrane // not recorded /// 0005622 // intracellular // not recorded /// 0005622 // intracellular // inferred from electronic annotation /// 0005624 // membrane fraction // inferred from direct assay /// 0005624 // membrane fraction //…	0000149 // SNARE binding // inferred from direct assay /// 0005515 // protein binding // inferred from physical interaction /// 0019905 // syntaxin binding // inferred from direct assay /// 0031748 // D1 dopamine receptor binding // not recorded /// 0031748 // D1 dopamine receptor binding // inferred from sequence or structural similarity /// 0031748 // D1 dopamine receptor binding // inferred fr…	Cav2 /// LOC100362824	caveolin 2 /// caveolin 2-like	6.76741	6.87763	6.78061	7.26856	7.15876	7.75598	7.15977	7.15287	0.00652326	406.41	86
1368453_at	0006629 // lipid metabolic process // inferred from electronic annotation /// 0006633 // fatty acid biosynthetic process // inferred from electronic annotation /// 0006636 // unsaturated fatty acid biosynthetic process // inferred from electronic annotation /// 0006810 // transport // inferred from electronic annotation /// 0008610 // lipid biosynthetic process // inferred from electronic annotat…	0005783 // endoplasmic reticulum // inferred from electronic annotation /// 0005789 // endoplasmic reticulum membrane // inferred from electronic annotation /// 0016020 // membrane // inferred from electronic annotation /// 0016021 // integral to membrane // inferred from electronic annotation	0004768 // stearoyl-CoA 9-desaturase activity // inferred from electronic annotation /// 0004768 // stearoyl-CoA 9-desaturase activity // not recorded /// 0004768 // stearoyl-CoA 9-desaturase activity // traceable author statement /// 0005506 // iron ion binding // inferred from electronic annotation /// 0016491 // oxidoreductase activity // inferred from electronic annotation /// 0016717 // oxid…	Fads2	fatty acid desaturase 2	9.83766	10.014	10.0497	10.4659	10.2673	10.493	10.5065	10.4284	0.00644828	406.449	87
1398348_at	---	---	---	---	---	8.8368	8.56935	8.53195	8.8956	9.14646	9.20844	9.10227	8.79353	0.00655682	409.806	88
1368934_at	0001676 // long-chain fatty acid metabolic process // not recorded /// 0001822 // kidney development // inferred from expression pattern /// 0001890 // placenta development // inferred from expression pattern /// 0003091 // renal water homeostasis // not recorded /// 0003095 // pressure natriuresis // not recorded /// 0006691 // leukotriene metabolic process // not recorded /// 0019369 // arachid…	0005737 // cytoplasm // not recorded /// 0005783 // endoplasmic reticulum // inferred from electronic annotation /// 0005789 // endoplasmic reticulum membrane // inferred from electronic annotation /// 0005792 // microsome // inferred from direct assay /// 0005792 // microsome // not recorded /// 0005792 // microsome // inferred from electronic annotation /// 0016020 // membrane // inferred from …	0004497 // monooxygenase activity // inferred from electronic annotation /// 0005506 // iron ion binding // inferred from electronic annotation /// 0008391 // arachidonic acid monooxygenase activity // inferred from direct assay /// 0008391 // arachidonic acid monooxygenase activity // inferred from mutant phenotype /// 0008392 // arachidonic acid epoxygenase activity // not recorded /// 0009055 …	Cyp4a1	cytochrome P450, family 4, subfamily a, polypeptide 1	11.9757	11.318	10.9385	11.5582	11.7837	11.7576	12.0817	11.8782	0.00653933	411.588	89
1385592_at	0000122 // negative regulation of transcription from RNA polymerase II promoter // inferred from electronic annotation /// 0000122 // negative regulation of transcription from RNA polymerase II promoter // not recorded /// 0000415 // negative regulation of histone H3-K36 methylation // inferred from electronic annotation /// 0000415 // negative regulation of histone H3-K36 methylation // not reco…	0005634 // nucleus // not recorded /// 0005634 // nucleus // inferred from electronic annotation /// 0031519 // PcG protein complex // inferred from electronic annotation /// 0031519 // PcG protein complex // not recorded	0003714 // transcription corepressor activity // inferred from electronic annotation /// 0003714 // transcription corepressor activity // not recorded /// 0004842 // ubiquitin-protein ligase activity // inferred from electronic annotation /// 0004842 // ubiquitin-protein ligase activity // not recorded /// 0008134 // transcription factor binding // inferred from electronic annotation /// 0008134 …	Bcor	BCL6 co-repressor	7.77952	8.0397	7.72011	7.5186	8.24277	7.89324	8.05936	8.12765	0.00674444	416.982	90
1385953_at	0006355 // regulation of transcription, DNA-dependent // inferred from electronic annotation /// 0007379 // segment specification // not recorded /// 0007379 // segment specification // inferred from electronic annotation /// 0009952 // anterior/posterior pattern specification // not recorded /// 0009952 // anterior/posterior pattern specification // inferred from electronic annotation /// 009009…	0005634 // nucleus // inferred from electronic annotation	---	Mllt3	myeloid/lymphoid or mixed-lineage leukemia (trithorax homolog, Drosophila); translocated to, 3	7.03281	7.024	7.15357	6.97617	7.21632	7.40031	7.10615	7.81407	0.0067033	417.437	91
1388985_at	---	---	---	LOC100912922	uncharacterized LOC100912922	9.1967	8.9656	8.99208	9.22753	9.68682	9.57413	9.39653	9.09681	0.00672826	418.799	92
1373161_at	---	0005783 // endoplasmic reticulum // inferred from electronic annotation /// 0005783 // endoplasmic reticulum // not recorded /// 0016020 // membrane // inferred from electronic annotation /// 0016021 // integral to membrane // inferred from electronic annotation	---	Tmem98	transmembrane protein 98	8.65814	8.44044	8.35728	8.61049	8.8162	8.73963	8.80931	8.90158	0.00674194	419.918	93
1386888_at	0000082 // G1/S transition of mitotic cell cycle // inferred from electronic annotation /// 0000082 // G1/S transition of mitotic cell cycle // not recorded /// 0006417 // regulation of translation // inferred from electronic annotation /// 0008286 // insulin receptor signaling pathway // inferred from electronic annotation /// 0008286 // insulin receptor signaling pathway // not recorded /// 001…	0005634 // nucleus // inferred from direct assay /// 0005737 // cytoplasm // inferred from direct assay /// 0043234 // protein complex // inferred from direct assay	0008190 // eukaryotic initiation factor 4E binding // inferred from physical interaction /// 0008190 // eukaryotic initiation factor 4E binding // not recorded /// 0008190 // eukaryotic initiation factor 4E binding // inferred from electronic annotation /// 0031369 // translation initiation factor binding // inferred from physical interaction	Eif4ebp1	eukaryotic translation initiation factor 4E binding protein 1	8.10935	8.03207	7.87768	7.98	8.30029	8.42336	8.26494	8.18946	0.0067234	421.202	94
1386321_s_at	0006351 // transcription, DNA-dependent // inferred from electronic annotation /// 0006355 // regulation of transcription, DNA-dependent // inferred from electronic annotation /// 0006468 // protein phosphorylation // inferred from electronic annotation /// 0006469 // negative regulation of protein kinase activity // not recorded /// 0006469 // negative regulation of protein kinase activity // in…	0005634 // nucleus // not recorded /// 0005634 // nucleus // inferred from sequence or structural similarity /// 0005634 // nucleus // inferred from electronic annotation /// 0005730 // nucleolus // not recorded	0003714 // transcription corepressor activity // inferred from electronic annotation /// 0003714 // transcription corepressor activity // not recorded /// 0003714 // transcription corepressor activity // inferred from sequence or structural similarity /// 0004672 // protein kinase activity // inferred from electronic annotation /// 0004860 // protein kinase inhibitor activity // inferred from ele…	Trib3	tribbles homolog 3 (Drosophila)	7.97852	7.56184	7.43435	7.2714	8.18715	7.79514	8.06236	7.59476	0.00670526	422.545	95
1384275_at	---	---	---	LOC688328	hypothetical protein LOC688328	7.11286	7.29216	7.51995	6.99686	7.33548	7.52395	7.4426	8.00073	0.00667708	422.96	96
1378482_at	0007257 // activation of JUN kinase activity // inferred from electronic annotation /// 0007257 // activation of JUN kinase activity // not recorded /// 0030111 // regulation of Wnt receptor signaling pathway // inferred from electronic annotation /// 0030111 // regulation of Wnt receptor signaling pathway // not recorded /// 0042308 // negative regulation of protein import into nucleus // inferr…	0005634 // nucleus // not recorded /// 0005634 // nucleus // inferred from electronic annotation /// 0005730 // nucleolus // inferred from electronic annotation /// 0005730 // nucleolus // not recorded /// 0005737 // cytoplasm // not recorded /// 0005737 // cytoplasm // inferred from electronic annotation /// 0005794 // Golgi apparatus // inferred from electronic annotation /// 0005794 // Golgi a…	0008134 // transcription factor binding // not recorded /// 0008134 // transcription factor binding // inferred from electronic annotation /// 0030332 // cyclin binding // inferred from electronic annotation /// 0030332 // cyclin binding // not recorded /// 0030957 // Tat protein binding // inferred from electronic annotation /// 0030957 // Tat protein binding // not recorded	Mdfic	MyoD family inhibitor domain containing	8.49312	7.77659	7.61462	7.60292	8.49968	8.39957	8.06691	8.01089	0.00691753	428.053	97
1380347_at	---	---	---	---	---	6.77935	6.9901	6.75836	6.93067	6.79896	7.39846	7.27506	7.32383	0.00690816	428.924	98
1374393_at	---	---	---	Ptplb	protein tyrosine phosphatase-like (proline instead of catalytic arginine), member b	9.14174	9.30206	9.47059	9.45551	9.53995	9.72497	9.52459	9.66198	0.00692929	430.459	99
1390109_at	---	---	---	LOC100909889	uncharacterized LOC100909889	7.73534	7.2829	7.22728	7.26295	7.59033	7.58126	7.9263	7.83181	0.00742	438.753	100
1385016_at	---	---	---	RGD1560784	similar to RIKEN cDNA B630019K06	8.63821	6.40924	6.37171	6.67053	7.63063	7.45644	7.40512	6.42792	0.00743564	440.556	101
1391407_at	---	---	---	---	---	8.03909	7.03646	6.79255	8.18386	8.77138	8.48343	7.31142	6.99365	0.00736275	440.58	102
1381722_at	---	---	---	Plin5	perilipin 5	6.82511	6.75038	6.43128	6.43172	6.61799	7.10911	6.94854	7.16137	0.00736893	441.843	103
1385252_at	---	---	---	---	---	8.32652	8.32202	8.21457	8.00368	8.47912	8.45847	8.4402	8.63092	0.00809615	454.117	104
1383616_at	0019221 // cytokine-mediated signaling pathway // not recorded	---	0004920 // interleukin-10 receptor activity // not recorded	Il10rb	interleukin 10 receptor, beta	8.17434	8.24256	8.16378	7.98502	8.33909	8.49562	8.3542	8.48413	0.00815238	456.825	105
1391570_at	0007010 // cytoskeleton organization // inferred from electronic annotation /// 0045944 // positive regulation of transcription from RNA polymerase II promoter // inferred from electronic annotation	---	0003779 // actin binding // inferred from electronic annotation /// 0008270 // zinc ion binding // inferred from electronic annotation /// 0046872 // metal ion binding // inferred from electronic annotation	Ablim3	actin binding LIM protein family, member 3	7.12993	7.01259	6.92746	6.63985	7.21572	7.09275	7.37272	7.28463	0.00877359	467.445	106
1374635_at	---	---	---	---	---	8.01548	7.78345	7.86303	7.98784	8.22888	8.28756	8.11454	8.0912	0.00928037	474.126	107
1376925_at	0008360 // regulation of cell shape // inferred from electronic annotation	0005737 // cytoplasm // inferred from direct assay /// 0005737 // cytoplasm // not recorded /// 0005737 // cytoplasm // inferred from electronic annotation /// 0016020 // membrane // inferred from electronic annotation /// 0030425 // dendrite // inferred from direct assay /// 0030425 // dendrite // inferred from electronic annotation /// 0042995 // cell projection // inferred from electronic anno…	---	Palmd	palmdelphin	7.21267	7.06845	7.1657	7.15554	7.52096	7.27907	7.26512	7.6282	0.00925	474.965	108
1378260_at	0001523 // retinoid metabolic process // not recorded /// 0001523 // retinoid metabolic process // inferred from electronic annotation /// 0006068 // ethanol catabolic process // inferred from electronic annotation /// 0006068 // ethanol catabolic process // not recorded /// 0006069 // ethanol oxidation // inferred from direct assay /// 0006069 // ethanol oxidation // not recorded /// 0009790 // …	0005622 // intracellular // not recorded /// 0005622 // intracellular // inferred from electronic annotation /// 0005625 // soluble fraction // inferred from direct assay /// 0005737 // cytoplasm // inferred from electronic annotation /// 0005739 // mitochondrion // inferred from electronic annotation /// 0005739 // mitochondrion // not recorded /// 0005829 // cytosol // inferred from direct assay	0000166 // nucleotide binding // inferred from electronic annotation /// 0004022 // alcohol dehydrogenase (NAD) activity // inferred from direct assay /// 0004022 // alcohol dehydrogenase (NAD) activity // not recorded /// 0004022 // alcohol dehydrogenase (NAD) activity // traceable author statement /// 0004022 // alcohol dehydrogenase (NAD) activity // inferred from electronic annotation /// 000…	Adh1	alcohol dehydrogenase 1 (class I)	8.19164	7.81182	7.46822	7.8691	7.94574	8.2324	8.44293	8.09029	0.00969725	483.169	109
1373719_at	0006468 // protein phosphorylation // not recorded /// 0006468 // protein phosphorylation // inferred from sequence or structural similarity /// 0006468 // protein phosphorylation // inferred from electronic annotation /// 0006950 // response to stress // not recorded /// 0006950 // response to stress // inferred from sequence or structural similarity /// 0006950 // response to stress // inferred…	---	0000166 // nucleotide binding // inferred from electronic annotation /// 0004672 // protein kinase activity // inferred from electronic annotation /// 0004674 // protein serine/threonine kinase activity // not recorded /// 0004674 // protein serine/threonine kinase activity // inferred from sequence or structural similarity /// 0004674 // protein serine/threonine kinase activity // inferred from …	Map4k3	mitogen-activated protein kinase kinase kinase kinase 3	8.66512	8.08905	8.61337	8.61652	8.75051	8.74673	8.77739	8.83278	0.0100909	489.549	110
1389230_at	---	---	---	---	---	11.6202	11.6663	11.6009	12.0166	11.9001	11.9493	12.0199	12.2796	0.010027	490.354	111
1378324_at	0030030 // cell projection organization // inferred from electronic annotation	0005929 // cilium // inferred from electronic annotation /// 0042995 // cell projection // inferred from electronic annotation	---	Ttc30b	tetratricopeptide repeat domain 30B	6.67945	6.90365	7.09227	6.75575	6.97926	7.18119	7.1191	7.24434	0.0101161	493.402	112
1374713_at	---	---	---	---	---	7.52052	7.26177	7.65917	7.38959	7.55932	7.73545	7.76486	7.94688	0.0102124	495.618	113
1374571_at	0006506 // GPI anchor biosynthetic process // inferred from electronic annotation	0005783 // endoplasmic reticulum // inferred from electronic annotation /// 0005789 // endoplasmic reticulum membrane // inferred from electronic annotation /// 0016020 // membrane // inferred from electronic annotation /// 0016021 // integral to membrane // inferred from electronic annotation	---	Pigx	phosphatidylinositol glycan anchor biosynthesis, class X	9.46779	9.38928	9.36611	9.30857	9.59601	9.64295	9.63714	9.69672	0.0103596	498.255	114
1389531_at	---	0000775 // chromosome, centromeric region // inferred from electronic annotation /// 0000775 // chromosome, centromeric region // not recorded /// 0005634 // nucleus // inferred from electronic annotation /// 0005730 // nucleolus // inferred from electronic annotation /// 0005730 // nucleolus // not recorded /// 0030496 // midbody // inferred from electronic annotation /// 0030496 // midbody // n…	0008270 // zinc ion binding // inferred from electronic annotation	Zfp330	zinc finger protein 330	8.98766	8.7166	8.68379	8.93422	9.01864	9.17253	9.08683	9.11118	0.0102783	498.318	115
1367948_a_at	0001525 // angiogenesis // inferred from electronic annotation /// 0001541 // ovarian follicle development // not recorded /// 0001570 // vasculogenesis // not recorded /// 0001570 // vasculogenesis // inferred from sequence or structural similarity /// 0001666 // response to hypoxia // inferred from mutant phenotype /// 0001938 // positive regulation of endothelial cell proliferation // inferred…	0005624 // membrane fraction // inferred from direct assay /// 0005634 // nucleus // inferred from electronic annotation /// 0005737 // cytoplasm // inferred from direct assay /// 0005737 // cytoplasm // inferred from electronic annotation /// 0005768 // endosome // inferred from electronic annotation /// 0005769 // early endosome // inferred from electronic annotation /// 0005886 // plasma membr…	0000166 // nucleotide binding // inferred from electronic annotation /// 0004672 // protein kinase activity // inferred from electronic annotation /// 0004713 // protein tyrosine kinase activity // not recorded /// 0004713 // protein tyrosine kinase activity // inferred from electronic annotation /// 0004714 // transmembrane receptor protein tyrosine kinase activity // inferred from electronic an…	Kdr	kinase insert domain receptor	10.012	9.90434	9.80624	9.81715	10.0917	10.0853	10.2192	10.1917	0.0107069	506.779	116
1369840_at	0055085 // transmembrane transport // inferred from electronic annotation	0016021 // integral to membrane // inferred from electronic annotation	0022857 // transmembrane transporter activity // inferred from electronic annotation	UST4r	integral membrane transport protein UST4r	6.80231	6.58378	6.56233	7.26024	6.86784	6.95629	7.17979	7.55179	0.0106154	506.964	117
1375845_at	---	0016021 // integral to membrane // inferred from electronic annotation	---	Aig1	androgen-induced 1	7.53719	7.0212	7.21878	7.6593	7.3295	7.86277	7.92443	7.65723	0.0117542	522.149	118
1388531_at	---	0016020 // membrane // inferred from electronic annotation /// 0016021 // integral to membrane // inferred from electronic annotation	0004872 // receptor activity // inferred from electronic annotation /// 0005496 // steroid binding // inferred from electronic annotation /// 0008289 // lipid binding // inferred from electronic annotation /// 0020037 // heme binding // inferred from electronic annotation	Pgrmc2	progesterone receptor membrane component 2	10.1882	10.2086	10.1302	9.88912	10.3973	10.3139	10.3359	10.3906	0.0116555	522.21	119
1383110_at	---	0005737 // cytoplasm // inferred from electronic annotation /// 0030424 // axon // inferred from electronic annotation /// 0042995 // cell projection // inferred from electronic annotation /// 0043204 // perikaryon // inferred from electronic annotation	---	Klhl24	kelch-like 24 (Drosophila)	9.12985	8.82128	8.58081	8.69253	9.2071	9.04254	9.09239	9.18848	0.012	527.642	120
1372011_at	---	---	---	---	---	9.13619	9.14579	8.89196	9.05181	9.20227	9.46488	9.41405	9.14967	0.0119339	528.074	121
1373950_at	0000122 // negative regulation of transcription from RNA polymerase II promoter // inferred from electronic annotation /// 0000122 // negative regulation of transcription from RNA polymerase II promoter // not recorded /// 0006351 // transcription, DNA-dependent // inferred from electronic annotation /// 0016032 // viral reproduction // inferred from electronic annotation /// 0045893 // positive …	0005634 // nucleus // not recorded /// 0016604 // nuclear body // inferred from electronic annotation /// 0016604 // nuclear body // not recorded	0003677 // DNA binding // inferred from electronic annotation /// 0003677 // DNA binding // not recorded /// 0003700 // sequence-specific DNA binding transcription factor activity // inferred from electronic annotation /// 0008270 // zinc ion binding // inferred from electronic annotation /// 0043621 // protein self-association // inferred from electronic annotation /// 0043621 // protein self-as…	Zfp496	zinc finger protein 496	7.73957	7.68089	7.38335	7.47132	7.82196	7.78798	7.76753	7.9506	0.0118607	528.262	122
1373060_at	0015031 // protein transport // inferred from electronic annotation	0005622 // intracellular // inferred from electronic annotation /// 0005634 // nucleus // inferred from electronic annotation /// 0005737 // cytoplasm // inferred from electronic annotation /// 0005739 // mitochondrion // inferred from electronic annotation	0019904 // protein domain specific binding // inferred from electronic annotation	---	---	8.15188	7.75265	7.84372	7.90471	8.26357	8.31789	7.95917	8.2278	0.0120488	531.001	123
1379316_at	---	---	---	---	---	6.85204	6.82461	7.05294	6.95577	7.16435	7.32381	6.96081	7.2998	0.0125	538.466	124
1377307_at	---	---	---	Fam89a	family with sequence similarity 89, member A	9.46566	8.43059	8.3525	8.3018	8.98429	8.98119	8.98724	8.66288	0.013272	547.372	125
1376703_at	---	0000776 // kinetochore // not recorded /// 0031080 // nuclear pore outer ring // not recorded /// 0046930 // pore complex // inferred from electronic annotation	0015288 // porin activity // inferred from electronic annotation	Nup37	nucleoporin 37	8.19381	7.96095	8.10216	8.18227	8.31473	8.37948	8.32531	8.39082	0.0134444	549.851	126
1383692_at	---	0005739 // mitochondrion // not recorded /// 0005739 // mitochondrion // inferred from electronic annotation	---	Prelid2	PRELI domain containing 2	8.52602	8.02782	8.16254	7.76516	8.52688	8.34233	8.50253	8.51759	0.0137165	553.73	127
1373959_at	2001241 // positive regulation of extrinsic apoptotic signaling pathway in absence of ligand // not recorded	---	---	Ppp2r1b	protein phosphatase 2, regulatory subunit A, beta	7.57495	7.22446	7.31289	7.37873	7.4855	7.60597	7.69946	7.80421	0.0140078	557.969	128
1379285_at	0001580 // detection of chemical stimulus involved in sensory perception of bitter taste // inferred from electronic annotation /// 0001580 // detection of chemical stimulus involved in sensory perception of bitter taste // not recorded /// 0006612 // protein targeting to membrane // inferred from electronic annotation /// 0006612 // protein targeting to membrane // not recorded	0005737 // cytoplasm // inferred from electronic annotation /// 0005737 // cytoplasm // not recorded	0004872 // receptor activity // inferred from electronic annotation	Rtp4	receptor (chemosensory) transporter protein 4	7.37829	7.38922	7.3652	7.66307	7.73014	7.70647	7.61273	7.76426	0.0139147	558.375	129
1389169_at	---	0016020 // membrane // inferred from electronic annotation /// 0016021 // integral to membrane // inferred from electronic annotation	0004872 // receptor activity // inferred from electronic annotation /// 0005496 // steroid binding // inferred from electronic annotation /// 0008289 // lipid binding // inferred from electronic annotation /// 0020037 // heme binding // inferred from electronic annotation	Pgrmc2	progesterone receptor membrane component 2	9.14095	9.18944	9.10112	9.03149	9.39159	9.32674	9.36583	9.3275	0.0138923	559.053	130
1382884_at	---	---	---	---	---	7.87997	7.5597	7.47018	7.35248	8.04695	7.89225	7.77076	7.75631	0.0147863	568.546	131
1387605_at	0006508 // proteolysis // inferred from direct assay /// 0006508 // proteolysis // inferred from electronic annotation /// 0006915 // apoptotic process // inferred from electronic annotation /// 0006915 // apoptotic process // not recorded /// 0006915 // apoptotic process // traceable author statement /// 0006926 // virus-infected cell apoptotic process // inferred from electronic annotation /// …	0005622 // intracellular // inferred from electronic annotation /// 0005622 // intracellular // not recorded /// 0005634 // nucleus // inferred from direct assay /// 0005783 // endoplasmic reticulum // traceable author statement /// 0005792 // microsome // inferred from direct assay /// 0005829 // cytosol // inferred from direct assay	0002020 // protease binding // inferred from direct assay /// 0004175 // endopeptidase activity // inferred from direct assay /// 0004197 // cysteine-type endopeptidase activity // inferred from electronic annotation /// 0005515 // protein binding // inferred from physical interaction /// 0008233 // peptidase activity // inferred from electronic annotation /// 0008234 // cysteine-type peptidase a…	Casp12	caspase 12	7.71563	7.60635	7.48261	7.47113	7.7212	7.84911	7.79835	7.8774	0.0148561	569.976	132
1376924_a_at	0008360 // regulation of cell shape // inferred from electronic annotation	0005737 // cytoplasm // inferred from direct assay /// 0005737 // cytoplasm // not recorded /// 0005737 // cytoplasm // inferred from electronic annotation /// 0016020 // membrane // inferred from electronic annotation /// 0030425 // dendrite // inferred from direct assay /// 0030425 // dendrite // inferred from electronic annotation /// 0042995 // cell projection // inferred from electronic anno…	---	Palmd	palmdelphin	9.9499	9.71272	9.75064	9.83916	10.1067	10.0206	9.98868	10.0908	0.0151353	573.753	133
1379608_at	---	---	---	RGD1560010	RGD1560010	7.65294	7.02784	6.60364	6.83663	7.84703	7.54677	7.08638	6.97081	0.0150299	573.869	134
1384405_at	---	---	---	LOC682360	hypothetical protein LOC682360	8.04177	7.9006	7.93893	7.87739	8.23253	8.1741	8.17947	8.11233	0.0152519	577.784	135
1398622_at	---	---	---	---	---	8.34577	8.2875	7.89968	8.11065	8.54054	8.49678	8.34057	8.3726	0.0152574	579.295	136
1384244_at	0008152 // metabolic process // inferred from electronic annotation /// 0055114 // oxidation-reduction process // inferred from electronic annotation	0005739 // mitochondrion // inferred from electronic annotation /// 0005739 // mitochondrion // not recorded /// 0005777 // peroxisome // inferred from electronic annotation /// 0005777 // peroxisome // not recorded	0000166 // nucleotide binding // inferred from electronic annotation /// 0016491 // oxidoreductase activity // inferred from electronic annotation /// 0032934 // sterol binding // inferred from electronic annotation	Hsdl2	hydroxysteroid dehydrogenase like 2	10.4525	9.83048	9.6806	9.99127	10.4325	10.3069	10.3882	10.2837	0.0160146	588.147	137
1367705_at	0006810 // transport // inferred from electronic annotation /// 0022900 // electron transport chain // inferred from electronic annotation /// 0045454 // cell redox homeostasis // inferred from electronic annotation	0005634 // nucleus // not recorded /// 0005737 // cytoplasm // inferred from electronic annotation /// 0005737 // cytoplasm // not recorded /// 0005739 // mitochondrion // not recorded	0009055 // electron carrier activity // inferred from electronic annotation /// 0015035 // protein disulfide oxidoreductase activity // inferred from electronic annotation /// 0047485 // protein N-terminus binding // not recorded	Glrx	glutaredoxin (thioltransferase)	7.9816	7.80152	7.87489	8.06661	8.1215	8.22481	8.17322	8.10318	0.0159058	588.466	138
1367957_at	0007165 // signal transduction // inferred from direct assay /// 0009968 // negative regulation of signal transduction // inferred from electronic annotation /// 0038032 // termination of G-protein coupled receptor signaling pathway // inferred from electronic annotation /// 0043547 // positive regulation of GTPase activity // not recorded	0005634 // nucleus // inferred from electronic annotation /// 0005634 // nucleus // not recorded /// 0005737 // cytoplasm // not recorded /// 0005737 // cytoplasm // inferred from electronic annotation /// 0005886 // plasma membrane // not recorded /// 0016020 // membrane // inferred from electronic annotation	0005096 // GTPase activator activity // not recorded	Rgs3	regulator of G-protein signaling 3	9.98862	8.77171	8.19508	9.99463	10.0864	8.98808	10.2952	8.71754	0.0158129	588.724	139
1376076_at	---	---	---	---	---	7.97756	7.34459	7.1962	7.47916	7.87993	7.87401	7.86462	7.81162	0.0158571	590.108	140
1367932_at	0001101 // response to acid // inferred from expression pattern /// 0001889 // liver development // inferred from expression pattern /// 0006694 // steroid biosynthetic process // inferred from electronic annotation /// 0006695 // cholesterol biosynthetic process // inferred from electronic annotation /// 0007420 // brain development // inferred from expression pattern /// 0008152 // metabolic pr…	0005737 // cytoplasm // inferred from electronic annotation /// 0005829 // cytosol // inferred from direct assay /// 0005829 // cytosol // traceable author statement	0003824 // catalytic activity // inferred from electronic annotation /// 0004421 // hydroxymethylglutaryl-CoA synthase activity // inferred from direct assay /// 0004421 // hydroxymethylglutaryl-CoA synthase activity // inferred from mutant phenotype /// 0004421 // hydroxymethylglutaryl-CoA synthase activity // traceable author statement /// 0004421 // hydroxymethylglutaryl-CoA synthase activity …	Hmgcs1	3-hydroxy-3-methylglutaryl-CoA synthase 1 (soluble)	11.9673	11.5582	11.2475	11.1753	11.9558	11.7811	11.9616	11.7183	0.0158865	591.118	141
1371091_at	0002053 // positive regulation of mesenchymal cell proliferation // not recorded /// 0002053 // positive regulation of mesenchymal cell proliferation // inferred from electronic annotation /// 0002903 // negative regulation of B cell apoptotic process // not recorded /// 0002903 // negative regulation of B cell apoptotic process // inferred from electronic annotation /// 0007420 // brain developm…	0005792 // microsome // inferred from electronic annotation /// 0005829 // cytosol // not recorded /// 0005829 // cytosol // inferred from electronic annotation /// 0005886 // plasma membrane // not recorded /// 0005886 // plasma membrane // inferred from electronic annotation	0004872 // receptor activity // inferred from electronic annotation /// 0005158 // insulin receptor binding // inferred from mutant phenotype /// 0005158 // insulin receptor binding // inferred from electronic annotation /// 0005515 // protein binding // inferred from physical interaction /// 0005543 // phospholipid binding // inferred from electronic annotation /// 0019901 // protein kinase bind…	Irs2	insulin receptor substrate 2	8.47718	7.45414	7.3196	7.92481	8.10849	7.94295	8.53448	7.86988	0.0161197	594.611	142
1369195_at	0006631 // fatty acid metabolic process // inferred from direct assay /// 0006810 // transport // inferred from electronic annotation /// 0015908 // fatty acid transport // inferred from expression pattern /// 0015909 // long-chain fatty acid transport // inferred from direct assay /// 0050892 // intestinal absorption // inferred from direct assay	0005737 // cytoplasm // inferred from direct assay /// 0005737 // cytoplasm // inferred from electronic annotation /// 0005886 // plasma membrane // inferred from direct assay /// 0005902 // microvillus // inferred from direct assay /// 0044424 // intracellular part // not recorded /// 0044424 // intracellular part // inferred from electronic annotation /// 0045179 // apical cortex // inferred fr…	0005215 // transporter activity // inferred from electronic annotation /// 0005324 // long-chain fatty acid transporter activity // inferred from direct assay /// 0005504 // fatty acid binding // inferred from direct assay /// 0005504 // fatty acid binding // inferred from physical interaction /// 0005504 // fatty acid binding // traceable author statement /// 0008289 // lipid binding // inferred…	Fabp2	fatty acid binding protein 2, intestinal	6.71055	7.22622	7.22062	7.09064	7.21016	7.3621	7.23759	7.52994	0.0163357	597.991	143
1389527_at	---	0016020 // membrane // inferred from electronic annotation /// 0016021 // integral to membrane // inferred from electronic annotation	---	LOC378467	promethin	7.80389	7.4764	7.49231	7.68728	8.13193	7.8734	7.95759	7.60376	0.0164167	600.392	144
1374475_at	---	0016020 // membrane // inferred from electronic annotation /// 0016021 // integral to membrane // inferred from electronic annotation	0004091 // carboxylesterase activity // inferred from electronic annotation /// 0016787 // hydrolase activity // inferred from electronic annotation	Abhd1	abhydrolase domain containing 1	8.85227	8.92321	8.90867	8.97506	8.97754	9.29714	9.04785	9.20252	0.0163793	601.488	145
1393119_at	---	---	---	---	---	7.31588	6.0655	5.86979	6.53312	6.95353	6.93183	6.90496	6.23796	0.0164452	603.311	146
1377379_at	0006355 // regulation of transcription, DNA-dependent // inferred from electronic annotation /// 0007050 // cell cycle arrest // inferred from electronic annotation /// 0007050 // cell cycle arrest // not recorded /// 0008285 // negative regulation of cell proliferation // inferred from electronic annotation /// 0008285 // negative regulation of cell proliferation // not recorded /// 0030216 // k…	0005737 // cytoplasm // inferred from electronic annotation /// 0005737 // cytoplasm // not recorded	0000975 // regulatory region DNA binding // inferred from electronic annotation /// 0003677 // DNA binding // not recorded /// 0003677 // DNA binding // inferred from electronic annotation /// 0003700 // sequence-specific DNA binding transcription factor activity // inferred from electronic annotation /// 0003700 // sequence-specific DNA binding transcription factor activity // not recorded	Irf6	interferon regulatory factor 6	9.74243	9.69359	9.60777	9.42382	9.86999	9.81829	9.82537	9.8773	0.0165102	604.939	147
1380794_at	---	---	---	---	---	7.86068	7.54846	7.91467	7.88868	7.97995	8.07909	8.05353	7.97328	0.0167027	608.745	148
1380004_at	---	---	---	---	---	7.74113	7.29665	7.07962	7.32029	7.60121	7.64943	8.00044	7.46293	0.0166309	609.295	149
1378074_at	0000160 // two-component signal transduction system (phosphorelay) // inferred from electronic annotation /// 0005975 // carbohydrate metabolic process // inferred from electronic annotation /// 0006006 // glucose metabolic process // inferred from electronic annotation /// 0006086 // acetyl-CoA biosynthetic process from pyruvate // traceable author statement /// 0006468 // protein phosphorylatio…	0005739 // mitochondrion // inferred from direct assay /// 0005739 // mitochondrion // not recorded /// 0005739 // mitochondrion // inferred from electronic annotation /// 0005743 // mitochondrial inner membrane // inferred from electronic annotation /// 0005743 // mitochondrial inner membrane // not recorded /// 0005759 // mitochondrial matrix // inferred from electronic annotation	0000155 // two-component sensor activity // inferred from electronic annotation /// 0000166 // nucleotide binding // inferred from electronic annotation /// 0004672 // protein kinase activity // not recorded /// 0004672 // protein kinase activity // inferred from electronic annotation /// 0004673 // protein histidine kinase activity // inferred from electronic annotation /// 0004740 // pyruvate d…	Pdk4	pyruvate dehydrogenase kinase, isozyme 4	11.4301	10.4305	9.72869	10.7149	11.298	10.8254	11.4419	9.98366	0.0167933	612.075	150
1382864_at	0008360 // regulation of cell shape // inferred from electronic annotation	0005737 // cytoplasm // inferred from direct assay /// 0005737 // cytoplasm // not recorded /// 0005737 // cytoplasm // inferred from electronic annotation /// 0016020 // membrane // inferred from electronic annotation /// 0030425 // dendrite // inferred from direct assay /// 0030425 // dendrite // inferred from electronic annotation /// 0042995 // cell projection // inferred from electronic anno…	---	Palmd	palmdelphin	8.44303	8.22495	8.34037	8.35831	8.56808	8.45121	8.57878	8.67181	0.0167483	612.74	151
1371989_at	0016568 // chromatin modification // inferred from electronic annotation /// 0045944 // positive regulation of transcription from RNA polymerase II promoter // inferred from electronic annotation /// 0045944 // positive regulation of transcription from RNA polymerase II promoter // not recorded /// 0051091 // positive regulation of sequence-specific DNA binding transcription factor activity // in…	0000785 // chromatin // inferred from electronic annotation /// 0005634 // nucleus // inferred from electronic annotation /// 0005634 // nucleus // not recorded /// 0005730 // nucleolus // not recorded /// 0005737 // cytoplasm // inferred from electronic annotation /// 0005737 // cytoplasm // not recorded	0003677 // DNA binding // inferred from electronic annotation /// 0003682 // chromatin binding // inferred from electronic annotation /// 0003682 // chromatin binding // not recorded /// 0031492 // nucleosomal DNA binding // inferred from electronic annotation	Hmgn3	high mobility group nucleosomal binding domain 3	7.60472	7.85968	7.88102	7.87766	7.92743	8.21109	7.8929	8.02057	0.0167434	613.85	152
1393160_at	---	---	---	---	---	6.65433	7.45575	7.61145	6.74568	7.08095	7.27586	7.14317	8.15502	0.0167843	615.187	153
1370436_at	0006629 // lipid metabolic process // inferred from electronic annotation /// 0006631 // fatty acid metabolic process // inferred from electronic annotation /// 0008152 // metabolic process // inferred from electronic annotation /// 0036112 // medium-chain fatty-acyl-CoA metabolic process // not recorded	0005739 // mitochondrion // not recorded /// 0005739 // mitochondrion // inferred from electronic annotation /// 0005759 // mitochondrial matrix // inferred from electronic annotation	0000166 // nucleotide binding // inferred from electronic annotation /// 0003824 // catalytic activity // inferred from electronic annotation /// 0005524 // ATP binding // inferred from electronic annotation /// 0016874 // ligase activity // inferred from electronic annotation /// 0046872 // metal ion binding // inferred from electronic annotation /// 0047760 // butyrate-CoA ligase activity // in…	Acsm2a	acyl-CoA synthetase medium-chain family member 2A	7.60272	6.86897	6.93408	7.79606	7.54131	7.78204	7.87146	7.57287	0.0167792	616.334	154
1387111_at	0000052 // citrulline metabolic process // inferred from electronic annotation /// 0000052 // citrulline metabolic process // not recorded /// 0000052 // citrulline metabolic process // inferred from sequence or structural similarity /// 0003073 // regulation of systemic arterial blood pressure // inferred from electronic annotation /// 0003073 // regulation of systemic arterial blood pressure //…	0005737 // cytoplasm // inferred from electronic annotation /// 0005739 // mitochondrion // inferred from electronic annotation /// 0005739 // mitochondrion // not recorded	0016403 // dimethylargininase activity // inferred from direct assay /// 0016403 // dimethylargininase activity // inferred from electronic annotation /// 0016403 // dimethylargininase activity // not recorded /// 0016403 // dimethylargininase activity // inferred from sequence or structural similarity /// 0016403 // dimethylargininase activity // traceable author statement /// 0016597 // amino a…	Ddah1	dimethylarginine dimethylaminohydrolase 1	9.33908	8.8798	8.87369	9.35082	9.42735	9.57056	9.39872	9.14308	0.0167548	616.996	155
1373778_at	---	---	---	---	---	8.49154	8.63532	8.48387	8.34305	8.54578	8.86082	8.64915	8.89188	0.0167244	618.394	156
1384285_at	0006897 // endocytosis // inferred from electronic annotation /// 0016567 // protein ubiquitination // inferred from electronic annotation	0005764 // lysosome // not recorded /// 0005764 // lysosome // inferred from sequence or structural similarity /// 0005764 // lysosome // inferred from electronic annotation /// 0005768 // endosome // not recorded /// 0005768 // endosome // inferred from sequence or structural similarity /// 0005768 // endosome // inferred from electronic annotation /// 0016020 // membrane // inferred from electr…	0008270 // zinc ion binding // inferred from electronic annotation /// 0016874 // ligase activity // inferred from electronic annotation /// 0046872 // metal ion binding // inferred from electronic annotation	2009-03-02	membrane-associated ring finger (C3HC4) 3	6.58493	6.46205	6.48912	6.65493	6.79453	6.90137	6.68896	6.6645	0.0168217	620.444	157
1389173_at	---	---	0050733 // RS domain binding // not recorded	Son	Son DNA binding protein	7.57533	7.33974	7.60574	7.68458	7.74346	7.72033	7.68703	7.92609	0.0170316	623.678	158
1367980_at	0006810 // transport // inferred from electronic annotation /// 0006897 // endocytosis // inferred from electronic annotation /// 0006915 // apoptotic process // inferred from electronic annotation /// 0015031 // protein transport // inferred from electronic annotation /// 0043547 // positive regulation of GTPase activity // inferred from electronic annotation	0005737 // cytoplasm // inferred from electronic annotation /// 0005768 // endosome // not recorded /// 0005768 // endosome // inferred from sequence or structural similarity /// 0005768 // endosome // inferred from electronic annotation /// 0005769 // early endosome // inferred from electronic annotation /// 0016023 // cytoplasmic membrane-bounded vesicle // inferred from electronic annotation /…	0005096 // GTPase activator activity // inferred from electronic annotation /// 0008083 // growth factor activity // inferred from electronic annotation /// 0042803 // protein homodimerization activity // not recorded /// 0042803 // protein homodimerization activity // inferred from electronic annotation	Rabep1	rabaptin, RAB GTPase binding effector protein 1	8.5268	8.64486	8.53911	8.53475	8.70668	8.73648	8.72773	8.92988	0.0172201	626.478	159
1398901_at	0000059 // protein import into nucleus, docking // inferred from mutant phenotype /// 0006260 // DNA replication // not recorded /// 0006810 // transport // inferred from electronic annotation /// 0015031 // protein transport // inferred from electronic annotation /// 0051028 // mRNA transport // inferred from electronic annotation	0000776 // kinetochore // not recorded /// 0005634 // nucleus // not recorded /// 0005634 // nucleus // inferred from electronic annotation /// 0005635 // nuclear envelope // not recorded /// 0005643 // nuclear pore // inferred from direct assay /// 0005643 // nuclear pore // inferred from electronic annotation /// 0005643 // nuclear pore // not recorded /// 0005654 // nucleoplasm // inferred fro…	0005515 // protein binding // inferred from physical interaction /// 0042277 // peptide binding // inferred from direct assay	Nup98	nucleoporin 98	8.82363	8.43165	8.30265	8.20307	8.8414	8.74378	8.62637	8.81665	0.0171125	626.599	160
1397468_at	0008152 // metabolic process // inferred from electronic annotation /// 0055114 // oxidation-reduction process // inferred from electronic annotation	0005739 // mitochondrion // inferred from electronic annotation /// 0005739 // mitochondrion // not recorded /// 0005777 // peroxisome // inferred from electronic annotation /// 0005777 // peroxisome // not recorded	0000166 // nucleotide binding // inferred from electronic annotation /// 0016491 // oxidoreductase activity // inferred from electronic annotation /// 0032934 // sterol binding // inferred from electronic annotation	Hsdl2	hydroxysteroid dehydrogenase like 2	8.07535	7.63067	7.59791	7.60967	8.02602	8.0171	8.18998	7.94401	0.0170373	626.949	161
1368888_a_at	0001525 // angiogenesis // inferred from electronic annotation /// 0001525 // angiogenesis // not recorded /// 0007399 // nervous system development // not recorded /// 0007399 // nervous system development // inferred from electronic annotation /// 0007413 // axonal fasciculation // inferred from direct assay /// 0007413 // axonal fasciculation // not recorded /// 0007413 // axonal fasciculation…	0005635 // nuclear envelope // not recorded /// 0005635 // nuclear envelope // inferred from sequence or structural similarity /// 0005635 // nuclear envelope // inferred from electronic annotation /// 0005737 // cytoplasm // inferred from direct assay /// 0005783 // endoplasmic reticulum // inferred from direct assay /// 0005783 // endoplasmic reticulum // inferred from electronic annotation ///…	0005515 // protein binding // inferred from physical interaction /// 0032403 // protein complex binding // inferred from direct assay	Rtn4	reticulon 4	8.3669	8.32999	8.09968	8.37524	8.35999	8.71326	8.5906	8.64194	0.0169506	627.194	162
1387036_at	0000122 // negative regulation of transcription from RNA polymerase II promoter // inferred from direct assay /// 0000122 // negative regulation of transcription from RNA polymerase II promoter // inferred from mutant phenotype /// 0000122 // negative regulation of transcription from RNA polymerase II promoter // not recorded /// 0001701 // in utero embryonic development // not recorded /// 00018…	0005622 // intracellular // not recorded /// 0005634 // nucleus // not recorded /// 0005634 // nucleus // inferred from sequence or structural similarity /// 0005634 // nucleus // inferred from electronic annotation /// 0005654 // nucleoplasm // traceable author statement /// 0005737 // cytoplasm // not recorded	0000981 // sequence-specific DNA binding RNA polymerase II transcription factor activity // not recorded /// 0001078 // RNA polymerase II core promoter proximal region sequence-specific DNA binding transcription factor activity involved in negative regulation of transcription // not recorded /// 0001078 // RNA polymerase II core promoter proximal region sequence-specific DNA binding transcription…	Hes1	hairy and enhancer of split 1 (Drosophila)	9.1645	8.89974	9.21912	8.89732	9.08509	9.33825	9.27532	9.59767	0.0170061	628.479	163
1398850_at	0000413 // protein peptidyl-prolyl isomerization // not recorded /// 0000413 // protein peptidyl-prolyl isomerization // inferred from sequence or structural similarity /// 0000413 // protein peptidyl-prolyl isomerization // inferred from electronic annotation /// 0006457 // protein folding // inferred from electronic annotation /// 0030182 // neuron differentiation // not recorded /// 0045069 //…	0005634 // nucleus // not recorded /// 0005634 // nucleus // inferred from sequence or structural similarity /// 0005737 // cytoplasm // inferred from electronic annotation /// 0005829 // cytosol // not recorded /// 0005829 // cytosol // inferred from sequence or structural similarity	0003755 // peptidyl-prolyl cis-trans isomerase activity // not recorded /// 0003755 // peptidyl-prolyl cis-trans isomerase activity // inferred from sequence or structural similarity /// 0003755 // peptidyl-prolyl cis-trans isomerase activity // inferred from electronic annotation /// 0016853 // isomerase activity // inferred from electronic annotation /// 0042277 // peptide binding // inferred f…	LOC100360977 /// LOC100362969 /// LOC100364739 /// Ppia	TRIMCyp-like /// TRIMCyp-like /// TRIMCyp-like /// peptidylprolyl isomerase A (cyclophilin A)	12.3071	12.3015	12.2962	12.4007	12.4026	12.646	12.6107	12.4834	0.0169085	628.683	164
1389857_at	---	---	0050699 // WW domain binding // inferred from electronic annotation /// 0050699 // WW domain binding // not recorded	Wbp5	WW domain binding protein 5	7.62856	7.54881	7.57228	7.58583	7.69077	7.84762	7.81655	7.84037	0.0168545	629.446	165
1377642_at	0001937 // negative regulation of endothelial cell proliferation // not recorded /// 0001937 // negative regulation of endothelial cell proliferation // inferred from sequence or structural similarity /// 0001937 // negative regulation of endothelial cell proliferation // inferred from electronic annotation /// 0006906 // vesicle fusion // not recorded /// 0006906 // vesicle fusion // inferred fr…	0000139 // Golgi membrane // inferred from electronic annotation /// 0002080 // acrosomal membrane // inferred from electronic annotation /// 0002080 // acrosomal membrane // not recorded /// 0005622 // intracellular // not recorded /// 0005622 // intracellular // inferred from electronic annotation /// 0005624 // membrane fraction // inferred from direct assay /// 0005624 // membrane fraction //…	0000149 // SNARE binding // inferred from direct assay /// 0005515 // protein binding // inferred from physical interaction /// 0019905 // syntaxin binding // inferred from direct assay /// 0031748 // D1 dopamine receptor binding // not recorded /// 0031748 // D1 dopamine receptor binding // inferred from sequence or structural similarity /// 0031748 // D1 dopamine receptor binding // inferred fr…	Cav2	caveolin 2	6.80184	6.86577	7.00132	7.46216	7.23317	7.62418	7.113	7.14705	0.0178072	639.74	166
1368509_at	0007288 // sperm axoneme assembly // inferred from electronic annotation /// 0007288 // sperm axoneme assembly // not recorded /// 0008104 // protein localization // not recorded /// 0008104 // protein localization // inferred from electronic annotation /// 0010629 // negative regulation of gene expression // inferred from electronic annotation /// 0010629 // negative regulation of gene expressio…	0005737 // cytoplasm // inferred from electronic annotation /// 0005886 // plasma membrane // inferred from electronic annotation /// 0005929 // cilium // inferred from electronic annotation /// 0005932 // microtubule basal body // inferred from electronic annotation /// 0005932 // microtubule basal body // not recorded /// 0016020 // membrane // inferred from electronic annotation /// 0031514 //…	0005515 // protein binding // inferred from sequence or structural similarity	Bbs2	Bardet-Biedl syndrome 2	7.61561	7.33836	7.29269	7.00466	7.61404	7.43148	7.70442	7.63097	0.0179521	641.709	167
1383012_at	0007165 // signal transduction // inferred from electronic annotation	0005622 // intracellular // inferred from electronic annotation	---	Rhpn2	rhophilin, Rho GTPase binding protein 2	7.76471	7.75854	7.72696	7.57437	7.93126	7.77705	8.10347	7.8626	0.0179762	642.982	168
1372844_at	0000122 // negative regulation of transcription from RNA polymerase II promoter // inferred from electronic annotation /// 0000122 // negative regulation of transcription from RNA polymerase II promoter // not recorded /// 0000187 // activation of MAPK activity // inferred from electronic annotation /// 0000187 // activation of MAPK activity // not recorded /// 0001525 // angiogenesis // non-trac…	0005576 // extracellular region // inferred from electronic annotation /// 0005886 // plasma membrane // inferred from electronic annotation /// 0016020 // membrane // inferred from electronic annotation /// 0031225 // anchored to membrane // inferred from electronic annotation /// 0046658 // anchored to plasma membrane // inferred from electronic annotation /// 0046658 // anchored to plasma memb…	0046875 // ephrin receptor binding // not recorded /// 0046875 // ephrin receptor binding // traceable author statement /// 0046875 // ephrin receptor binding // inferred from electronic annotation	Efna1	ephrin A1	8.65302	8.95364	9.32183	8.65879	9.07786	8.983	9.00548	9.52819	0.018426	648.469	169
1391338_at	---	---	---	Eid2b	EP300 interacting inhibitor of differentiation 2B	6.9496	7.0113	7.03372	6.95852	7.04094	7.18327	7.18898	7.36102	0.0183529	648.839	170
1376808_at	---	---	---	---	---	6.96763	7.06571	6.83375	6.94376	7.18481	7.18361	7.14935	7.12477	0.0185789	651.89	171
1391629_at	---	---	---	---	---	6.89611	6.72786	6.58493	6.61373	6.852	6.76724	6.95906	7.40492	0.0192267	657.816	172
1389179_at	0006629 // lipid metabolic process // inferred from electronic annotation /// 0006629 // lipid metabolic process // not recorded /// 0006915 // apoptotic process // inferred from electronic annotation /// 0032720 // negative regulation of tumor necrosis factor production // inferred from electronic annotation /// 0032720 // negative regulation of tumor necrosis factor production // not recorded /…	0005622 // intracellular // inferred from electronic annotation /// 0005739 // mitochondrion // not recorded /// 0005739 // mitochondrion // inferred from electronic annotation /// 0005740 // mitochondrial envelope // inferred from electronic annotation /// 0005740 // mitochondrial envelope // not recorded /// 0005811 // lipid particle // inferred from electronic annotation /// 0005811 // lipid p…	---	Cidea	cell death-inducing DFFA-like effector a	7.54526	7.25552	6.93016	7.41835	7.5117	7.70252	7.84395	7.32393	0.0193121	659.414	173
1367836_at	0001676 // long-chain fatty acid metabolic process // inferred from mutant phenotype /// 0001676 // long-chain fatty acid metabolic process // traceable author statement /// 0006006 // glucose metabolic process // inferred from mutant phenotype /// 0006629 // lipid metabolic process // inferred from electronic annotation /// 0006631 // fatty acid metabolic process // inferred from electronic anno…	0005739 // mitochondrion // inferred from direct assay /// 0005739 // mitochondrion // not recorded /// 0005739 // mitochondrion // inferred from electronic annotation /// 0005741 // mitochondrial outer membrane // inferred from direct assay /// 0005741 // mitochondrial outer membrane // inferred from electronic annotation /// 0005743 // mitochondrial inner membrane // inferred from electronic an…	0004095 // carnitine O-palmitoyltransferase activity // inferred from direct assay /// 0004095 // carnitine O-palmitoyltransferase activity // inferred from mutant phenotype /// 0004095 // carnitine O-palmitoyltransferase activity // traceable author statement /// 0004095 // carnitine O-palmitoyltransferase activity // inferred from electronic annotation /// 0005515 // protein binding // inferred…	Cpt1a	carnitine palmitoyltransferase 1a, liver	8.78995	8.60987	8.29167	8.17998	8.61683	8.64803	8.84774	8.8358	0.0199713	665.719	174
1398296_at	0006071 // glycerol metabolic process // inferred from electronic annotation /// 0006629 // lipid metabolic process // inferred from electronic annotation /// 0007186 // G-protein coupled receptor signaling pathway // non-traceable author statement	0005737 // cytoplasm // inferred from electronic annotation /// 0016020 // membrane // inferred from electronic annotation /// 0016021 // integral to membrane // inferred from direct assay /// 0016021 // integral to membrane // inferred from electronic annotation	0008081 // phosphoric diester hydrolase activity // inferred from electronic annotation /// 0008889 // glycerophosphodiester phosphodiesterase activity // inferred from electronic annotation /// 0016787 // hydrolase activity // inferred from electronic annotation /// 0046872 // metal ion binding // inferred from electronic annotation /// 0047395 // glycerophosphoinositol glycerophosphodiesterase …	Gde1	glycerophosphodiester phosphodiesterase 1	10.0777	9.85356	9.67214	9.66786	10.107	10.0142	10.034	10.2363	0.01988	666.099	175
1373958_at	0034613 // cellular protein localization // inferred from electronic annotation /// 0034613 // cellular protein localization // not recorded /// 0045944 // positive regulation of transcription from RNA polymerase II promoter // inferred from electronic annotation /// 0045944 // positive regulation of transcription from RNA polymerase II promoter // not recorded	0016020 // membrane // inferred from electronic annotation /// 0016021 // integral to membrane // inferred from electronic annotation /// 0031307 // integral to mitochondrial outer membrane // inferred from electronic annotation /// 0031307 // integral to mitochondrial outer membrane // not recorded	---	Armcx3	armadillo repeat containing, X-linked 3	7.87073	7.72031	7.70902	7.79841	7.94526	8.05457	8.0366	7.89301	0.0200284	668.933	176
1377750_at	0035023 // regulation of Rho protein signal transduction // inferred from electronic annotation /// 0035556 // intracellular signal transduction // inferred from electronic annotation	0005622 // intracellular // inferred from electronic annotation /// 0005622 // intracellular // not recorded	0005085 // guanyl-nucleotide exchange factor activity // inferred from electronic annotation /// 0005089 // Rho guanyl-nucleotide exchange factor activity // inferred from electronic annotation /// 0005543 // phospholipid binding // inferred from electronic annotation	Arhgef3	Rho guanine nucleotide exchange factor (GEF) 3	6.95956	6.68166	6.66251	6.68502	6.96181	7.0063	7.1211	6.8783	0.0200056	669.772	177
1374069_at	0000910 // cytokinesis // inferred from electronic annotation /// 0000910 // cytokinesis // not recorded /// 0006184 // GTP catabolic process // inferred from direct assay /// 0006184 // GTP catabolic process // not recorded /// 0006184 // GTP catabolic process // inferred from sequence or structural similarity /// 0006184 // GTP catabolic process // inferred from electronic annotation /// 000681…	0005739 // mitochondrion // inferred from electronic annotation /// 0005739 // mitochondrion // not recorded /// 0005768 // endosome // inferred from electronic annotation /// 0005802 // trans-Golgi network // inferred from electronic annotation /// 0005802 // trans-Golgi network // not recorded /// 0005886 // plasma membrane // inferred from electronic annotation /// 0016020 // membrane // infer…	0000166 // nucleotide binding // inferred from electronic annotation /// 0003924 // GTPase activity // inferred from direct assay /// 0003924 // GTPase activity // not recorded /// 0003924 // GTPase activity // inferred from sequence or structural similarity /// 0003924 // GTPase activity // inferred from electronic annotation /// 0005525 // GTP binding // inferred from direct assay /// 0005525 /…	Rab11a	RAB11a, member RAS oncogene family	9.18427	9.12751	9.10607	8.90605	9.31363	9.2688	9.29537	9.28776	0.0201798	672.011	178
1370045_at	0006260 // DNA replication // inferred from electronic annotation /// 0006261 // DNA-dependent DNA replication // inferred from electronic annotation /// 0006264 // mitochondrial DNA replication // inferred from electronic annotation /// 0006264 // mitochondrial DNA replication // not recorded /// 0006287 // base-excision repair, gap-filling // inferred from electronic annotation /// 0006287 // b…	0005739 // mitochondrion // inferred from direct assay /// 0005739 // mitochondrion // not recorded /// 0005739 // mitochondrion // inferred from electronic annotation /// 0005743 // mitochondrial inner membrane // inferred from electronic annotation /// 0005743 // mitochondrial inner membrane // not recorded /// 0005760 // gamma DNA polymerase complex // inferred from direct assay /// 0005760 //…	0002020 // protease binding // inferred from electronic annotation /// 0002020 // protease binding // not recorded /// 0003676 // nucleic acid binding // inferred from electronic annotation /// 0003677 // DNA binding // inferred from electronic annotation /// 0003682 // chromatin binding // inferred from electronic annotation /// 0003682 // chromatin binding // not recorded /// 0003682 // chromat…	Polg	Polymerase (DNA directed), gamma	9.40231	9.41794	9.3655	9.3061	9.52923	9.62535	9.57575	9.57859	0.0202346	673.825	179
1379513_at	0070863 // positive regulation of protein exit from endoplasmic reticulum // inferred from electronic annotation /// 0070863 // positive regulation of protein exit from endoplasmic reticulum // not recorded	0016020 // membrane // inferred from electronic annotation /// 0016021 // integral to membrane // inferred from electronic annotation	---	Tmem30b	transmembrane protein 30B	6.84423	6.80309	7.09342	7.01671	6.84672	6.85991	7.45738	7.879	0.0203667	676.064	180
1387183_at	0001579 // medium-chain fatty acid transport // traceable author statement /// 0006091 // generation of precursor metabolites and energy // not recorded /// 0006091 // generation of precursor metabolites and energy // inferred from sequence or structural similarity /// 0006629 // lipid metabolic process // inferred from electronic annotation /// 0006631 // fatty acid metabolic process // not reco…	0005625 // soluble fraction // inferred from direct assay /// 0005739 // mitochondrion // inferred from electronic annotation /// 0005739 // mitochondrion // not recorded /// 0005777 // peroxisome // inferred from direct assay /// 0005777 // peroxisome // inferred from electronic annotation /// 0005777 // peroxisome // not recorded /// 0043231 // intracellular membrane-bounded organelle // not re…	0005102 // receptor binding // not recorded /// 0008458 // carnitine O-octanoyltransferase activity // inferred from direct assay /// 0008458 // carnitine O-octanoyltransferase activity // inferred from electronic annotation /// 0008458 // carnitine O-octanoyltransferase activity // not recorded /// 0008458 // carnitine O-octanoyltransferase activity // traceable author statement /// 0016740 // t…	Crot	carnitine O-octanoyltransferase	8.34365	8.30556	8.15612	8.29415	8.29113	8.65412	8.5271	8.82913	0.0203315	676.658	181
1383230_at	---	0000784 // nuclear chromosome, telomeric region // not recorded /// 0000784 // nuclear chromosome, telomeric region // inferred from electronic annotation /// 0005634 // nucleus // not recorded /// 0005634 // nucleus // inferred from electronic annotation /// 0070188 // Stn1-Ten1 complex // not recorded /// 0070188 // Stn1-Ten1 complex // inferred from electronic annotation	---	RGD1311078	LOC360664	6.81329	7.10775	7.05611	7.07556	7.08278	7.5493	7.08331	7.34181	0.0206099	680.02	182
1393666_at	---	---	---	---	---	7.99556	7.66542	7.6849	7.81159	8.12178	8.06262	8.01822	7.90148	0.0207268	682.2	183
1385160_at	0006897 // endocytosis // inferred from direct assay /// 0006897 // endocytosis // inferred from electronic annotation /// 0007155 // cell adhesion // inferred from electronic annotation	0005737 // cytoplasm // inferred from electronic annotation /// 0005886 // plasma membrane // inferred from electronic annotation /// 0009897 // external side of plasma membrane // inferred from direct assay /// 0016020 // membrane // inferred from electronic annotation /// 0016021 // integral to membrane // inferred from electronic annotation	0004872 // receptor activity // inferred from electronic annotation /// 0005540 // hyaluronic acid binding // inferred from direct assay /// 0005540 // hyaluronic acid binding // inferred from electronic annotation /// 0051636 // Gram-negative bacterial cell surface binding // inferred from sequence or structural similarity	Stab2	stabilin 2	8.58155	8.64252	8.45855	8.4852	8.74528	8.64101	8.86644	8.83978	0.0209022	684.399	184
1389507_at	0006464 // cellular protein modification process // inferred from electronic annotation /// 0010038 // response to metal ion // not recorded /// 0010038 // response to metal ion // inferred from electronic annotation /// 0010766 // negative regulation of sodium ion transport // not recorded /// 0010766 // negative regulation of sodium ion transport // inferred from electronic annotation /// 00107…	0005622 // intracellular // inferred from electronic annotation	0004842 // ubiquitin-protein ligase activity // inferred from electronic annotation /// 0016874 // ligase activity // inferred from electronic annotation /// 0016881 // acid-amino acid ligase activity // inferred from electronic annotation /// 0017080 // sodium channel regulator activity // not recorded /// 0017080 // sodium channel regulator activity // inferred from electronic annotation /// 00…	Nedd4l	neural precursor cell expressed, developmentally down-regulated 4-like	9.3399	9.32315	9.29589	9.34577	9.52918	9.6977	9.3786	9.49412	0.0208054	684.699	185
1383421_at	---	---	---	---	---	9.17144	9.00033	8.97251	9.05939	9.30989	9.29063	9.23906	9.18277	0.0207957	685.971	186
1394681_at	0055114 // oxidation-reduction process // inferred from electronic annotation	---	0016491 // oxidoreductase activity // inferred from electronic annotation	Akr1cl1	aldo-keto reductase family 1, member C-like 1	7.84837	7.74738	7.58969	7.95698	8.04724	8.10562	7.91555	7.98388	0.0209786	688.36	187
1382779_at	0006351 // transcription, DNA-dependent // inferred from electronic annotation /// 0006355 // regulation of transcription, DNA-dependent // inferred from electronic annotation /// 0006464 // cellular protein modification process // inferred from electronic annotation /// 0006944 // cellular membrane fusion // not recorded /// 0006944 // cellular membrane fusion // inferred from sequence or struct…	0000139 // Golgi membrane // not recorded /// 0000139 // Golgi membrane // inferred from sequence or structural similarity /// 0000139 // Golgi membrane // inferred from electronic annotation /// 0005622 // intracellular // inferred from electronic annotation /// 0005634 // nucleus // not recorded /// 0005737 // cytoplasm // not recorded /// 0005737 // cytoplasm // inferred from electronic annota…	0004842 // ubiquitin-protein ligase activity // not recorded /// 0004842 // ubiquitin-protein ligase activity // inferred from sequence or structural similarity /// 0016874 // ligase activity // inferred from electronic annotation /// 0016881 // acid-amino acid ligase activity // inferred from electronic annotation /// 0017137 // Rab GTPase binding // not recorded /// 0017137 // Rab GTPase bindin…	Hace1	HECT domain and ankyrin repeat containing, E3 ubiquitin protein ligase 1	8.00937	7.90745	7.8487	7.96255	8.25549	8.13246	8.06254	8.08011	0.0211117	690.629	188
1383169_at	---	---	---	---	---	9.24416	9.06734	8.97158	9.32666	9.25361	9.47518	9.45923	9.33398	0.0210899	691.529	189
1383731_at	---	0005764 // lysosome // inferred from electronic annotation /// 0005765 // lysosomal membrane // inferred from electronic annotation /// 0005768 // endosome // inferred from electronic annotation /// 0016020 // membrane // inferred from electronic annotation /// 0016021 // integral to membrane // inferred from electronic annotation /// 0031902 // late endosome membrane // inferred from electronic …	---	Tmem106b	transmembrane protein 106B	10.1766	9.97059	9.79089	9.8271	10.2343	10.2968	10.1517	10.1743	0.0213526	695.055	190
1395704_at	---	---	---	---	---	6.14624	6.13425	6.35552	6.14823	6.25402	6.3999	6.25501	6.91276	0.0212775	695.439	191
1378152_at	---	---	---	---	---	8.02575	7.60825	7.63297	7.71945	8.11045	8.17455	7.72143	7.99425	0.021349	697.225	192
1370334_at	0007275 // multicellular organismal development // inferred from electronic annotation /// 0045595 // regulation of cell differentiation // inferred from expression pattern	0005737 // cytoplasm // inferred from electronic annotation /// 0016020 // membrane // inferred from electronic annotation /// 0016021 // integral to membrane // not recorded /// 0016021 // integral to membrane // inferred from electronic annotation	0005543 // phospholipid binding // inferred from electronic annotation /// 0008022 // protein C-terminus binding // not recorded /// 0008022 // protein C-terminus binding // inferred from electronic annotation /// 0042803 // protein homodimerization activity // not recorded /// 0042803 // protein homodimerization activity // inferred from electronic annotation	Plekhb1	pleckstrin homology domain containing, family B (evectins) member 1	9.09009	9.05053	8.99999	8.9195	9.19515	9.24105	9.16767	9.26461	0.0216839	701.507	193
1376211_a_at	0051260 // protein homooligomerization // inferred from electronic annotation	---	0005216 // ion channel activity // inferred from electronic annotation	Kctd6	potassium channel tetramerisation domain containing 6	8.35693	8.28995	8.34325	8.07299	8.59456	8.64314	8.32578	8.54078	0.0216856	702.754	194
1370940_at	0010033 // response to organic substance // inferred from expression pattern	0005737 // cytoplasm // not recorded /// 0005886 // plasma membrane // not recorded /// 0005921 // gap junction // inferred from direct assay /// 0005923 // tight junction // inferred from direct assay /// 0005923 // tight junction // not recorded /// 0005923 // tight junction // inferred from electronic annotation /// 0030054 // cell junction // not recorded	0008022 // protein C-terminus binding // inferred from physical interaction	Tjp2	tight junction protein 2	7.90501	8.00257	7.98878	8.0326	8.12318	8.3916	8.07511	8.07772	0.0217436	704.488	195
1394570_at	0006810 // transport // inferred from electronic annotation /// 0006865 // amino acid transport // inferred from electronic annotation	0016020 // membrane // inferred from electronic annotation /// 0016021 // integral to membrane // inferred from electronic annotation	---	Xk	X-linked Kx blood group (McLeod syndrome)	8.35795	8.1007	8.20286	7.96269	8.53739	8.3283	8.52704	8.26637	0.0217398	705.518	196
1383189_at	---	---	---	---	---	7.52042	7.32373	7.32108	7.43333	7.58141	7.51254	7.83431	7.58499	0.0229848	718.076	197
1367777_at	0006635 // fatty acid beta-oxidation // inferred from electronic annotation /// 0006635 // fatty acid beta-oxidation // not recorded /// 0051289 // protein homotetramerization // inferred from electronic annotation /// 0051289 // protein homotetramerization // not recorded /// 0055114 // oxidation-reduction process // inferred from electronic annotation	0005634 // nucleus // inferred from electronic annotation /// 0005634 // nucleus // not recorded /// 0005730 // nucleolus // not recorded /// 0005737 // cytoplasm // not recorded /// 0005737 // cytoplasm // inferred from electronic annotation /// 0005739 // mitochondrion // inferred from electronic annotation /// 0005739 // mitochondrion // not recorded	0000166 // nucleotide binding // inferred from electronic annotation /// 0008670 // 2,4-dienoyl-CoA reductase (NADPH) activity // not recorded /// 0008670 // 2,4-dienoyl-CoA reductase (NADPH) activity // traceable author statement /// 0008670 // 2,4-dienoyl-CoA reductase (NADPH) activity // inferred from electronic annotation /// 0016491 // oxidoreductase activity // inferred from electronic anno…	Decr1	2,4-dienoyl CoA reductase 1, mitochondrial	11.6421	11.2818	11.1404	11.6199	11.613	11.6572	11.7755	11.7067	0.022904	718.494	198
1383080_at	---	---	---	---	---	10.8242	10.7847	10.8209	10.8619	11.0324	11.0175	10.9302	11.0597	0.0233769	723.419	199
1371102_x_at	0006749 // glutathione metabolic process // inferred from direct assay /// 0006810 // transport // inferred from electronic annotation /// 0010942 // positive regulation of cell death // not recorded /// 0015671 // oxygen transport // inferred from direct assay /// 0015671 // oxygen transport // inferred from electronic annotation /// 0042542 // response to hydrogen peroxide // not recorded /// 0…	0005833 // hemoglobin complex // inferred from direct assay /// 0005833 // hemoglobin complex // not recorded /// 0005833 // hemoglobin complex // inferred from electronic annotation /// 0031838 // haptoglobin-hemoglobin complex // not recorded	0004601 // peroxidase activity // not recorded /// 0005344 // oxygen transporter activity // inferred from electronic annotation /// 0005506 // iron ion binding // inferred from electronic annotation /// 0019825 // oxygen binding // inferred from direct assay /// 0019825 // oxygen binding // not recorded /// 0019825 // oxygen binding // inferred from electronic annotation /// 0020037 // heme bind…	Hbb /// LOC100134871 /// LOC689064	hemoglobin, beta /// beta globin minor gene /// beta-globin	9.64936	10.3461	9.75362	9.7349	10.3055	10.0669	10.0103	10.1026	0.0234	724.285	200
1375034_at	0006629 // lipid metabolic process // inferred from electronic annotation /// 0006631 // fatty acid metabolic process // inferred from electronic annotation /// 0006672 // ceramide metabolic process // inferred from electronic annotation /// 0006672 // ceramide metabolic process // not recorded /// 0046470 // phosphatidylcholine metabolic process // inferred from mutant phenotype	0005576 // extracellular region // inferred from electronic annotation /// 0005625 // soluble fraction // inferred from electronic annotation /// 0005739 // mitochondrion // inferred from electronic annotation /// 0005739 // mitochondrion // not recorded /// 0005764 // lysosome // inferred from sequence or structural similarity /// 0005764 // lysosome // traceable author statement /// 0005764 // …	0004622 // lysophospholipase activity // not recorded /// 0008374 // O-acyltransferase activity // inferred from direct assay /// 0008374 // O-acyltransferase activity // inferred from electronic annotation /// 0016740 // transferase activity // inferred from electronic annotation /// 0016746 // transferase activity, transferring acyl groups // inferred from electronic annotation /// 0016787 // h…	Pla2g15	phospholipase A2, group XV	8.9199	8.2426	8.06509	8.3945	8.74129	8.81799	8.64382	8.59079	0.0233035	724.634	201
1389248_at	0006012 // galactose metabolic process // inferred from direct assay /// 0006012 // galactose metabolic process // not recorded /// 0006012 // galactose metabolic process // inferred from electronic annotation /// 0008152 // metabolic process // inferred from electronic annotation /// 0016310 // phosphorylation // inferred from electronic annotation /// 0019402 // galactitol metabolic process // …	0005737 // cytoplasm // inferred from electronic annotation /// 0005737 // cytoplasm // not recorded /// 0016020 // membrane // not recorded	0000166 // nucleotide binding // inferred from electronic annotation /// 0004335 // galactokinase activity // inferred from direct assay /// 0004335 // galactokinase activity // not recorded /// 0004335 // galactokinase activity // inferred from electronic annotation /// 0005524 // ATP binding // inferred from mutant phenotype /// 0005524 // ATP binding // not recorded /// 0005524 // ATP binding …	Galk1	galactokinase 1	9.5052	9.56211	9.54998	9.77746	9.74776	10.0504	9.85575	9.6633	0.0236238	727.872	202
1372234_at	---	---	---	Lix1l	Lix1 homolog (mouse)-like	8.26313	8.13961	8.14633	8.25136	8.45454	8.34488	8.33201	8.4265	0.0238325	730.589	203
1386156_at	---	---	---	---	---	7.27632	7.06215	7.04732	7.21875	7.60514	7.53256	7.16374	7.27707	0.0242794	736.024	204
1373967_at	0006351 // transcription, DNA-dependent // inferred from electronic annotation /// 0006355 // regulation of transcription, DNA-dependent // inferred from electronic annotation /// 0006357 // regulation of transcription from RNA polymerase II promoter // inferred from electronic annotation /// 0006357 // regulation of transcription from RNA polymerase II promoter // not recorded	0005634 // nucleus // inferred from direct assay /// 0005634 // nucleus // not recorded /// 0005634 // nucleus // inferred from electronic annotation /// 0005667 // transcription factor complex // inferred from electronic annotation /// 0005667 // transcription factor complex // not recorded /// 0005730 // nucleolus // inferred from electronic annotation /// 0005730 // nucleolus // not recorded	0003677 // DNA binding // inferred from electronic annotation /// 0003697 // single-stranded DNA binding // inferred from electronic annotation /// 0003697 // single-stranded DNA binding // not recorded /// 0003713 // transcription coactivator activity // inferred from electronic annotation /// 0003713 // transcription coactivator activity // not recorded	Sub1	SUB1 homolog (S. cerevisiae)	8.59497	8.77523	8.69715	8.59421	8.81005	8.94623	8.78476	8.84222	0.0242585	736.574	205
1390249_at	---	---	---	RGD1305464	similar to human chromosome 15 open reading frame 39	7.19732	7.40427	7.41072	6.49198	7.4747	7.38737	7.31706	7.61849	0.0242913	737.82	206
1372654_at	---	0005737 // cytoplasm // inferred from electronic annotation /// 0005737 // cytoplasm // not recorded /// 0005886 // plasma membrane // inferred from electronic annotation /// 0005886 // plasma membrane // not recorded	---	Eps8l2	EPS8-like 2	9.09268	8.95415	8.86637	8.80773	9.1706	9.14476	9.05112	9.24801	0.0248068	743.098	207
1369468_at	0001553 // luteinization // not recorded /// 0001553 // luteinization // inferred from electronic annotation /// 0001568 // blood vessel development // not recorded /// 0001568 // blood vessel development // inferred from electronic annotation /// 0001570 // vasculogenesis // not recorded /// 0001570 // vasculogenesis // inferred from electronic annotation /// 0007165 // signal transduction // in…	0005737 // cytoplasm // not recorded /// 0005886 // plasma membrane // not recorded /// 0005886 // plasma membrane // inferred from electronic annotation /// 0005911 // cell-cell junction // inferred from electronic annotation /// 0005911 // cell-cell junction // not recorded /// 0009986 // cell surface // inferred from electronic annotation /// 0009986 // cell surface // not recorded /// 0016020…	0004871 // signal transducer activity // inferred from electronic annotation /// 0004872 // receptor activity // inferred from electronic annotation /// 0004888 // transmembrane signaling receptor activity // inferred from electronic annotation /// 0004930 // G-protein coupled receptor activity // inferred from electronic annotation /// 0017147 // Wnt-protein binding // inferred from physical int…	Fzd4	frizzled family receptor 4	6.75462	6.80303	6.70407	6.31839	6.81866	6.79533	6.81814	7.05768	0.0251394	747.537	208
1384180_at	0009615 // response to virus // inferred from electronic annotation /// 0009615 // response to virus // not recorded /// 0032091 // negative regulation of protein binding // inferred from electronic annotation /// 0032091 // negative regulation of protein binding // not recorded /// 0035457 // cellular response to interferon-alpha // inferred from electronic annotation /// 0035457 // cellular res…	---	---	Ifit2	interferon-induced protein with tetratricopeptide repeats 2	7.58342	7.64711	7.7207	8.04172	7.95921	7.97253	7.92237	8.10861	0.0254641	751.682	209
1372286_at	0007165 // signal transduction // not recorded /// 0007165 // signal transduction // inferred from electronic annotation /// 0043123 // positive regulation of I-kappaB kinase/NF-kappaB cascade // not recorded /// 0043123 // positive regulation of I-kappaB kinase/NF-kappaB cascade // inferred from electronic annotation	0016020 // membrane // inferred from electronic annotation /// 0016021 // integral to membrane // inferred from electronic annotation	0004871 // signal transducer activity // not recorded /// 0004871 // signal transducer activity // inferred from electronic annotation	Tspan6	tetraspanin 6	8.57593	8.4938	8.66942	8.61852	8.66454	8.84251	8.77678	8.90837	0.0254286	752.193	210
1387191_at	0006810 // transport // inferred from electronic annotation	0005576 // extracellular region // inferred from electronic annotation /// 0005576 // extracellular region // not recorded /// 0005634 // nucleus // inferred from electronic annotation	0005215 // transporter activity // inferred from electronic annotation /// 0005549 // odorant binding // inferred from electronic annotation	Pbsn	probasin	6.52571	7.71782	7.58379	6.72929	7.43212	7.51628	7.33084	7.64478	0.025782	755.856	211
1394327_at	---	---	---	RGD1564804	similar to chromosome 1 open reading frame 50	8.21448	8.04547	8.08834	7.88629	8.25669	8.33174	8.34978	8.15952	0.026217	760.311	212
1389178_at	0007275 // multicellular organismal development // inferred from electronic annotation /// 0007399 // nervous system development // inferred from electronic annotation /// 0030154 // cell differentiation // inferred from electronic annotation	0005576 // extracellular region // inferred from electronic annotation /// 0005634 // nucleus // inferred from electronic annotation /// 0005634 // nucleus // not recorded	---	Ngrn	neugrin, neurite outgrowth associated	8.55694	8.3659	8.41612	8.40155	8.58091	8.57298	8.64768	8.68643	0.0266385	764.149	213
1377848_at	0006281 // DNA repair // inferred from electronic annotation /// 0006302 // double-strand break repair // not recorded /// 0006302 // double-strand break repair // inferred from sequence or structural similarity /// 0006302 // double-strand break repair // inferred from electronic annotation /// 0006974 // response to DNA damage stimulus // inferred from electronic annotation /// 0010212 // respo…	0005634 // nucleus // not recorded /// 0005634 // nucleus // inferred from sequence or structural similarity /// 0005634 // nucleus // inferred from electronic annotation /// 0070531 // BRCA1-A complex // not recorded /// 0070531 // BRCA1-A complex // inferred from sequence or structural similarity /// 0070531 // BRCA1-A complex // inferred from electronic annotation	0031593 // polyubiquitin binding // not recorded /// 0031593 // polyubiquitin binding // inferred from sequence or structural similarity /// 0031593 // polyubiquitin binding // inferred from electronic annotation	Fam175a	family with sequence similarity 175, member A	7.63999	7.06844	7.33678	7.10148	7.59938	7.70632	7.57768	7.3491	0.0265841	764.611	214
1367847_at	0002526 // acute inflammatory response // inferred from electronic annotation /// 0002526 // acute inflammatory response // not recorded /// 0006461 // protein complex assembly // inferred from electronic annotation /// 0006461 // protein complex assembly // not recorded /// 0006473 // protein acetylation // inferred from electronic annotation /// 0006473 // protein acetylation // not recorded //…	0005634 // nucleus // inferred from electronic annotation /// 0005634 // nucleus // not recorded	0003682 // chromatin binding // inferred from electronic annotation /// 0003682 // chromatin binding // not recorded	Nupr1	nuclear protein, transcriptional regulator, 1	8.29725	8.34641	8.15145	8.65421	8.29955	8.85339	8.6711	8.60149	0.0266186	765.761	215
1378185_at	0006810 // transport // inferred from electronic annotation /// 0015031 // protein transport // inferred from electronic annotation /// 0051028 // mRNA transport // inferred from electronic annotation	0005622 // intracellular // inferred from electronic annotation /// 0005634 // nucleus // inferred from electronic annotation /// 0005737 // cytoplasm // inferred from electronic annotation	---	Nxt2	nuclear transport factor 2-like export factor 2	9.11187	9.22546	9.15802	8.88644	9.34033	9.22771	9.25728	9.27074	0.0265787	766.38	216
1368931_at	0006897 // endocytosis // inferred from electronic annotation	0005737 // cytoplasm // not recorded /// 0005737 // cytoplasm // inferred from electronic annotation /// 0005768 // endosome // inferred from electronic annotation /// 0016020 // membrane // inferred from electronic annotation /// 0031901 // early endosome membrane // inferred from electronic annotation	0005515 // protein binding // inferred from physical interaction /// 0008289 // lipid binding // inferred from electronic annotation /// 0042802 // identical protein binding // inferred from electronic annotation /// 0042802 // identical protein binding // not recorded	Sh3gl3	SH3-domain GRB2-like 3	8.10663	8.05066	8.03611	7.98678	8.18263	8.22108	8.27472	8.23133	0.0266037	767.744	217
1375422_at	---	---	---	---	---	11.0211	10.5638	10.7819	11.1921	11.0003	12.1079	11.0331	10.9096	0.0266835	769.511	218
1390830_at	---	0005576 // extracellular region // inferred from electronic annotation	---	LOC499602	hypothetical protein LOC499602	7.88881	7.2767	7.47929	7.35037	7.77339	7.88624	7.82142	7.736	0.0266575	769.976	219
1385029_at	---	---	---	---	---	8.55144	8.48165	8.41361	8.21053	8.54216	8.76889	8.62003	8.59988	0.0267955	772.157	220
1369990_at	0006259 // DNA metabolic process // inferred from electronic annotation /// 0006265 // DNA topological change // inferred from direct assay /// 0006265 // DNA topological change // inferred from electronic annotation /// 0006266 // DNA ligation // inferred from electronic annotation /// 0006470 // protein dephosphorylation // not recorded /// 0006470 // protein dephosphorylation // inferred from …	0000228 // nuclear chromosome // inferred from electronic annotation /// 0000793 // condensed chromosome // inferred from electronic annotation /// 0005634 // nucleus // inferred from direct assay /// 0005634 // nucleus // inferred from electronic annotation /// 0005654 // nucleoplasm // inferred from electronic annotation /// 0005694 // chromosome // inferred from electronic annotation /// 00057…	0000166 // nucleotide binding // inferred from electronic annotation /// 0003677 // DNA binding // inferred from electronic annotation /// 0003677 // DNA binding // traceable author statement /// 0003682 // chromatin binding // inferred from direct assay /// 0003682 // chromatin binding // inferred from electronic annotation /// 0003916 // DNA topoisomerase activity // inferred from direct assay …	Ptpmt1	protein tyrosine phosphatase, mitochondrial 1	9.78684	8.9883	9.87901	9.83781	9.87382	9.90706	9.847	9.93911	0.0271086	775.12	221
1392486_at	---	0005764 // lysosome // inferred from electronic annotation /// 0005765 // lysosomal membrane // inferred from electronic annotation /// 0005768 // endosome // inferred from electronic annotation /// 0016020 // membrane // inferred from electronic annotation /// 0016021 // integral to membrane // inferred from electronic annotation /// 0031902 // late endosome membrane // inferred from electronic …	---	Tmem106b	transmembrane protein 106B	10.3771	10.1841	10.0412	10.1577	10.4966	10.428	10.3989	10.2893	0.0273153	778.269	222
1393743_at	---	---	---	---	---	7.57115	7.03388	7.01892	7.13185	7.40943	7.44684	7.94396	7.0947	0.0279507	784.23	223
1372362_at	0006012 // galactose metabolic process // inferred from electronic annotation /// 0008152 // metabolic process // inferred from electronic annotation /// 0016310 // phosphorylation // inferred from electronic annotation /// 0046835 // carbohydrate phosphorylation // inferred from electronic annotation	0005737 // cytoplasm // inferred from electronic annotation	0000166 // nucleotide binding // inferred from electronic annotation /// 0004335 // galactokinase activity // inferred from electronic annotation /// 0004335 // galactokinase activity // not recorded /// 0005524 // ATP binding // inferred from electronic annotation /// 0016301 // kinase activity // inferred from electronic annotation /// 0016740 // transferase activity // inferred from electronic…	Galk2	galactokinase 2	8.21816	8.1603	7.42656	8.32944	8.23971	8.33521	8.32792	8.34164	0.0278973	784.794	224
1375220_at	0006810 // transport // inferred from electronic annotation /// 0022900 // electron transport chain // inferred from electronic annotation	0005739 // mitochondrion // inferred from sequence or structural similarity /// 0005739 // mitochondrion // inferred from electronic annotation /// 0005743 // mitochondrial inner membrane // inferred from electronic annotation /// 0016020 // membrane // inferred from electronic annotation /// 0016021 // integral to membrane // inferred from electronic annotation /// 0070469 // respiratory chain /…	---	Ndufa11	NADH dehydrogenase (ubiquinone) 1 alpha subcomplex 11	10.2198	10.3482	10.3313	10.3241	10.4307	10.547	10.3649	10.5478	0.0278489	785.569	225
1393915_at	0006644 // phospholipid metabolic process // inferred from electronic annotation /// 0008654 // phospholipid biosynthetic process // inferred from electronic annotation	0005783 // endoplasmic reticulum // inferred from electronic annotation /// 0005789 // endoplasmic reticulum membrane // inferred from electronic annotation /// 0016020 // membrane // inferred from electronic annotation /// 0016021 // integral to membrane // inferred from electronic annotation	0016740 // transferase activity // inferred from electronic annotation /// 0016746 // transferase activity, transferring acyl groups // inferred from electronic annotation /// 0047184 // 1-acylglycerophosphocholine O-acyltransferase activity // inferred from electronic annotation	Lpcat3	lysophosphatidylcholine acyltransferase 3	8.99215	9.1937	9.17549	8.93302	9.22446	9.25455	9.23064	9.23977	0.0282434	789.466	226
1371042_at	0006468 // protein phosphorylation // not recorded /// 0006468 // protein phosphorylation // inferred from sequence or structural similarity /// 0006468 // protein phosphorylation // inferred from electronic annotation /// 0006950 // response to stress // not recorded /// 0006950 // response to stress // inferred from sequence or structural similarity /// 0006950 // response to stress // inferred…	---	0000166 // nucleotide binding // inferred from electronic annotation /// 0004672 // protein kinase activity // inferred from electronic annotation /// 0004674 // protein serine/threonine kinase activity // not recorded /// 0004674 // protein serine/threonine kinase activity // inferred from sequence or structural similarity /// 0004674 // protein serine/threonine kinase activity // inferred from …	Map4k3	mitogen-activated protein kinase kinase kinase kinase 3	7.01207	6.88759	7.07032	6.98372	7.12637	7.18158	7.19262	7.1313	0.0284229	791.985	227
1375321_at	---	---	---	---	---	6.41935	6.68177	6.91488	6.71127	6.85284	6.80269	6.72392	7.29624	0.0285921	794.741	228
1389251_at	---	---	0016787 // hydrolase activity // inferred from electronic annotation	Nudt7	nudix (nucleoside diphosphate linked moiety X)-type motif 7	8.6019	8.70002	8.56275	8.4863	8.66193	8.74023	8.81496	8.93992	0.0287424	796.952	229
1390783_at	0006200 // ATP catabolic process // inferred from electronic annotation	---	0005524 // ATP binding // inferred from electronic annotation /// 0016887 // ATPase activity // inferred from electronic annotation	Abca8a	ATP-binding cassette, subfamily A (ABC1), member 8a	9.98788	9.9318	9.81775	10.0094	10.1377	10.0915	10.1387	10.0687	0.0291261	800.68	230
1367553_x_at	0006749 // glutathione metabolic process // inferred from direct assay /// 0006810 // transport // inferred from electronic annotation /// 0010942 // positive regulation of cell death // not recorded /// 0015671 // oxygen transport // inferred from direct assay /// 0015671 // oxygen transport // inferred from electronic annotation /// 0042542 // response to hydrogen peroxide // not recorded /// 0…	0005833 // hemoglobin complex // inferred from direct assay /// 0005833 // hemoglobin complex // not recorded /// 0005833 // hemoglobin complex // inferred from electronic annotation /// 0031838 // haptoglobin-hemoglobin complex // not recorded	0004601 // peroxidase activity // not recorded /// 0005344 // oxygen transporter activity // inferred from electronic annotation /// 0005506 // iron ion binding // inferred from electronic annotation /// 0019825 // oxygen binding // inferred from direct assay /// 0019825 // oxygen binding // not recorded /// 0019825 // oxygen binding // inferred from electronic annotation /// 0020037 // heme bind…	Hbb /// LOC100134871 /// LOC689064	hemoglobin, beta /// beta globin minor gene /// beta-globin	11.095	11.6428	11.0849	11.0376	11.6101	11.4373	11.392	11.3808	0.029355	803.028	231
1387407_at	0006334 // nucleosome assembly // inferred from electronic annotation	0005634 // nucleus // inferred from electronic annotation	---	Nap1l3	nucleosome assembly protein 1-like 3	6.20233	6.78791	6.5597	6.1698	6.36588	6.71089	6.73797	6.90694	0.0293017	803.554	232
1368241_a_at	0006897 // endocytosis // inferred from mutant phenotype /// 0007409 // axonogenesis // inferred from electronic annotation /// 0007409 // axonogenesis // not recorded /// 0007411 // axon guidance // inferred from genetic interaction /// 0035023 // regulation of Rho protein signal transduction // inferred from electronic annotation /// 0035023 // regulation of Rho protein signal transduction // n…	0005624 // membrane fraction // inferred from electronic annotation /// 0005624 // membrane fraction // not recorded /// 0005768 // endosome // not recorded /// 0005768 // endosome // inferred from sequence or structural similarity /// 0005768 // endosome // inferred from electronic annotation /// 0005815 // microtubule organizing center // not recorded /// 0005815 // microtubule organizing cente…	0005515 // protein binding // inferred from physical interaction /// 0035255 // ionotropic glutamate receptor binding // inferred from physical interaction	Flot1	flotillin 1	7.96568	7.98919	7.85171	7.82978	8.10877	8.11646	8.05914	8.05262	0.0292275	804.016	233
1371926_at	0005977 // glycogen metabolic process // inferred from electronic annotation /// 0005977 // glycogen metabolic process // not recorded /// 0006642 // triglyceride mobilization // inferred from mutant phenotype /// 0007165 // signal transduction // not recorded /// 0007165 // signal transduction // inferred from electronic annotation /// 0007584 // response to nutrient // inferred from expression …	0005615 // extracellular space // inferred from electronic annotation /// 0005615 // extracellular space // not recorded /// 0005896 // interleukin-6 receptor complex // inferred from electronic annotation /// 0005896 // interleukin-6 receptor complex // not recorded /// 0005900 // oncostatin-M receptor complex // inferred from electronic annotation /// 0005900 // oncostatin-M receptor complex //…	0004872 // receptor activity // inferred from electronic annotation /// 0004896 // cytokine receptor activity // inferred from electronic annotation /// 0004897 // ciliary neurotrophic factor receptor activity // not recorded /// 0004897 // ciliary neurotrophic factor receptor activity // inferred from electronic annotation /// 0004915 // interleukin-6 receptor activity // inferred from electroni…	Il6st	interleukin 6 signal transducer	11.1074	10.5463	10.4992	10.5892	10.983	10.881	11.0809	10.9316	0.0291111	804.12	234
1388679_at	0032313 // regulation of Rab GTPase activity // inferred from electronic annotation /// 0032851 // positive regulation of Rab GTPase activity // inferred from electronic annotation /// 0043547 // positive regulation of GTPase activity // inferred from electronic annotation	0005622 // intracellular // inferred from electronic annotation	0005096 // GTPase activator activity // inferred from electronic annotation /// 0005097 // Rab GTPase activator activity // inferred from electronic annotation	Tbc1d14	TBC1 domain family, member 14	9.01019	8.09578	7.9936	8.71857	8.99956	8.81075	8.27122	8.92857	0.0290596	804.5	235
1385355_at	---	---	---	---	---	8.93688	6.65901	6.42512	8.85535	8.98969	8.18378	8.38779	6.44872	0.0291907	806.728	236
1368270_at	0006397 // mRNA processing // inferred from electronic annotation /// 0006970 // response to osmotic stress // inferred from direct assay /// 0009972 // cytidine deamination // inferred from direct assay /// 0009972 // cytidine deamination // non-traceable author statement /// 0010043 // response to zinc ion // inferred from expression pattern /// 0010332 // response to gamma radiation // inferre…	0005634 // nucleus // inferred from direct assay /// 0005634 // nucleus // non-traceable author statement /// 0005737 // cytoplasm // inferred from direct assay /// 0005737 // cytoplasm // inferred from sequence or structural similarity	0003723 // RNA binding // non-traceable author statement /// 0004126 // cytidine deaminase activity // inferred from direct assay /// 0004126 // cytidine deaminase activity // non-traceable author statement /// 0005515 // protein binding // inferred from physical interaction /// 0008270 // zinc ion binding // inferred from electronic annotation /// 0016787 // hydrolase activity // inferred from e…	Apobec1	apolipoprotein B mRNA editing enzyme, catalytic polypeptide 1	7.71112	7.6976	7.44437	7.19701	7.89806	7.6706	7.86384	7.7004	0.0290675	806.745	237
1372220_at	---	---	---	---	---	8.73531	8.63759	8.44733	8.55533	8.75686	8.77821	8.78132	8.78058	0.0291723	808.666	238
1375640_at	0000413 // protein peptidyl-prolyl isomerization // not recorded /// 0000413 // protein peptidyl-prolyl isomerization // inferred from electronic annotation /// 0006457 // protein folding // inferred from electronic annotation /// 0006457 // protein folding // not recorded /// 0018208 // peptidyl-proline modification // not recorded	0005783 // endoplasmic reticulum // not recorded /// 0005783 // endoplasmic reticulum // inferred from electronic annotation /// 0005788 // endoplasmic reticulum lumen // inferred from electronic annotation /// 0016020 // membrane // not recorded	0003755 // peptidyl-prolyl cis-trans isomerase activity // not recorded /// 0003755 // peptidyl-prolyl cis-trans isomerase activity // inferred from electronic annotation /// 0005509 // calcium ion binding // inferred from electronic annotation /// 0005509 // calcium ion binding // not recorded /// 0005528 // FK506 binding // not recorded /// 0016853 // isomerase activity // inferred from electro…	Fkbp9	FK506 binding protein 9	8.61522	8.5083	8.52239	8.61273	8.69707	8.76291	8.74779	8.72663	0.0294393	811.8	239
1376065_at	0007080 // mitotic metaphase plate congression // not recorded /// 0042254 // ribosome biogenesis // inferred from electronic annotation	0000794 // condensed nuclear chromosome // not recorded /// 0005634 // nucleus // inferred from electronic annotation /// 0005730 // nucleolus // inferred from electronic annotation /// 0005730 // nucleolus // not recorded /// 0005783 // endoplasmic reticulum // not recorded	---	Rrs1	RRS1 ribosome biogenesis regulator homolog (S. cerevisiae)	8.52046	7.68833	7.88865	8.34986	8.69912	8.54003	8.16982	8.0395	0.0294208	812.617	240
1372591_at	0007005 // mitochondrion organization // not recorded /// 0007005 // mitochondrion organization // inferred from sequence or structural similarity	0005739 // mitochondrion // not recorded /// 0005739 // mitochondrion // inferred from electronic annotation /// 0005743 // mitochondrial inner membrane // inferred from electronic annotation /// 0016020 // membrane // inferred from electronic annotation /// 0016021 // integral to membrane // inferred from electronic annotation /// 0031305 // integral to mitochondrial inner membrane // not record…	---	Tmem11	transmembrane protein 11	8.59631	8.17631	8.40085	8.1961	8.67873	8.42375	8.4519	8.70342	0.0298548	816.853	241
1375934_at	0016567 // protein ubiquitination // not recorded /// 0016567 // protein ubiquitination // inferred from electronic annotation /// 0042036 // negative regulation of cytokine biosynthetic process // inferred from electronic annotation /// 0042036 // negative regulation of cytokine biosynthetic process // not recorded	0005770 // late endosome // inferred from electronic annotation /// 0005770 // late endosome // not recorded /// 0005783 // endoplasmic reticulum // inferred from electronic annotation /// 0005783 // endoplasmic reticulum // not recorded /// 0005794 // Golgi apparatus // inferred from electronic annotation /// 0005794 // Golgi apparatus // not recorded	0004842 // ubiquitin-protein ligase activity // inferred from electronic annotation /// 0004842 // ubiquitin-protein ligase activity // not recorded /// 0008270 // zinc ion binding // inferred from electronic annotation /// 0046872 // metal ion binding // inferred from electronic annotation	Rnf128	ring finger protein 128	10.331	10.1918	10.0895	10.2759	10.447	10.3967	10.3511	10.3861	0.0298678	817.609	242
1368692_a_at	0006646 // phosphatidylethanolamine biosynthetic process // inferred from electronic annotation /// 0006646 // phosphatidylethanolamine biosynthetic process // not recorded /// 0006646 // phosphatidylethanolamine biosynthetic process // inferred from sequence or structural similarity /// 0006656 // phosphatidylcholine biosynthetic process // not recorded /// 0006656 // phosphatidylcholine biosynt…	0005737 // cytoplasm // inferred from electronic annotation	0000166 // nucleotide binding // inferred from electronic annotation /// 0004103 // choline kinase activity // inferred from direct assay /// 0004103 // choline kinase activity // not recorded /// 0004103 // choline kinase activity // inferred from sequence or structural similarity /// 0004103 // choline kinase activity // traceable author statement /// 0004103 // choline kinase activity // infer…	Chka	choline kinase alpha	9.84303	8.8208	8.9026	8.31101	9.63794	9.30561	9.13866	8.75597	0.0304568	823.87	243
1375916_at	0006464 // cellular protein modification process // inferred from electronic annotation	---	0004719 // protein-L-isoaspartate (D-aspartate) O-methyltransferase activity // inferred from electronic annotation	Pcmtd2	protein-L-isoaspartate (D-aspartate) O-methyltransferase domain containing 2	9.56705	9.37957	9.37668	9.46549	9.65368	9.63518	9.57942	9.6126	0.030373	824.182	244
1368461_at	0006810 // transport // inferred from electronic annotation /// 0006811 // ion transport // inferred from electronic annotation /// 0009636 // response to toxin // inferred from electronic annotation /// 0015697 // quaternary ammonium group transport // inferred from direct assay /// 0015711 // organic anion transport // inferred from direct assay /// 0031427 // response to methotrexate // inferr…	0005886 // plasma membrane // inferred from electronic annotation /// 0016020 // membrane // inferred from electronic annotation /// 0016021 // integral to membrane // inferred from electronic annotation /// 0016323 // basolateral plasma membrane // inferred from direct assay /// 0016323 // basolateral plasma membrane // not recorded /// 0016323 // basolateral plasma membrane // inferred from ele…	0005080 // protein kinase C binding // inferred from physical interaction /// 0005215 // transporter activity // inferred from electronic annotation /// 0005452 // inorganic anion exchanger activity // inferred from electronic annotation /// 0005452 // inorganic anion exchanger activity // not recorded /// 0008514 // organic anion transmembrane transporter activity // inferred from direct assay /…	Slc22a8	solute carrier family 22 (organic anion transporter), member 8	9.7217	9.93686	9.94889	9.90621	10.0395	10.1132	9.95669	9.99678	0.0302816	824.5	245
1370235_at	0001942 // hair follicle development // not recorded /// 0006637 // acyl-CoA metabolic process // traceable author statement /// 0006641 // triglyceride metabolic process // not recorded /// 0006694 // steroid biosynthetic process // traceable author statement /// 0006810 // transport // inferred from electronic annotation /// 0007420 // brain development // inferred from expression pattern /// 0…	0005615 // extracellular space // inferred from direct assay /// 0005634 // nucleus // inferred from direct assay /// 0005737 // cytoplasm // inferred from direct assay /// 0005739 // mitochondrion // not recorded /// 0005886 // plasma membrane // inferred from direct assay /// 0008021 // synaptic vesicle // inferred from direct assay /// 0043292 // contractile fiber // inferred from direct assay	0000062 // fatty-acyl-CoA binding // inferred from physical interaction /// 0000062 // fatty-acyl-CoA binding // inferred from electronic annotation /// 0005515 // protein binding // inferred from physical interaction /// 0008289 // lipid binding // inferred from electronic annotation /// 0030156 // benzodiazepine receptor binding // inferred from direct assay	Dbi	diazepam binding inhibitor (GABA receptor modulator, acyl-CoA binding protein)	12.7228	12.665	12.7727	12.8012	12.8379	12.9392	12.8979	12.9192	0.0303415	826.058	246
1374584_at	0006468 // protein phosphorylation // not recorded /// 0006468 // protein phosphorylation // inferred from sequence or structural similarity /// 0006468 // protein phosphorylation // inferred from electronic annotation /// 0006915 // apoptotic process // inferred from electronic annotation /// 0006917 // induction of apoptosis // not recorded /// 0008631 // induction of apoptosis by oxidative str…	0005634 // nucleus // not recorded /// 0005634 // nucleus // inferred from sequence or structural similarity /// 0005634 // nucleus // inferred from electronic annotation /// 0005737 // cytoplasm // not recorded /// 0005737 // cytoplasm // inferred from sequence or structural similarity /// 0005737 // cytoplasm // inferred from electronic annotation /// 0016020 // membrane // inferred from electr…	0000166 // nucleotide binding // inferred from electronic annotation /// 0004672 // protein kinase activity // inferred from electronic annotation /// 0004674 // protein serine/threonine kinase activity // not recorded /// 0004674 // protein serine/threonine kinase activity // inferred from sequence or structural similarity /// 0004674 // protein serine/threonine kinase activity // inferred from …	Stk24	Serine/threonine kinase 24	9.01235	8.84133	8.75172	8.64176	8.8891	9.05625	9.07001	9.02683	0.0302996	826.664	247
1368278_at	---	---	0016936 // galactoside binding // inferred from direct assay /// 0030246 // carbohydrate binding // inferred from electronic annotation	Lgals2	lectin, galactoside-binding, soluble, 2	6.69987	6.9494	6.54787	6.80608	6.88458	7.02169	7.03952	6.90628	0.0312056	834.972	248
1398431_at	0006730 // one-carbon metabolic process // inferred from electronic annotation /// 0048015 // phosphatidylinositol-mediated signaling // inferred from electronic annotation /// 0048015 // phosphatidylinositol-mediated signaling // not recorded	0005737 // cytoplasm // inferred from electronic annotation /// 0005737 // cytoplasm // not recorded	0004089 // carbonate dehydratase activity // inferred from electronic annotation /// 0008270 // zinc ion binding // inferred from electronic annotation /// 0046872 // metal ion binding // inferred from electronic annotation	Car8	carbonic anhydrase 8	10.0051	9.51625	9.63755	10.193	10.1324	10.2879	10.0885	9.93471	0.0311325	835.358	249
1392929_at	---	---	---	RGD1565616	RGD1565616	9.0146	8.88864	8.73887	8.35161	9.15399	8.99773	8.94735	8.99962	0.0312	837.2	250
1398273_at	0000122 // negative regulation of transcription from RNA polymerase II promoter // inferred from electronic annotation /// 0000122 // negative regulation of transcription from RNA polymerase II promoter // not recorded /// 0000187 // activation of MAPK activity // inferred from electronic annotation /// 0000187 // activation of MAPK activity // not recorded /// 0001525 // angiogenesis // non-trac…	0005576 // extracellular region // inferred from electronic annotation /// 0005886 // plasma membrane // inferred from electronic annotation /// 0016020 // membrane // inferred from electronic annotation /// 0031225 // anchored to membrane // inferred from electronic annotation /// 0046658 // anchored to plasma membrane // inferred from electronic annotation /// 0046658 // anchored to plasma memb…	0046875 // ephrin receptor binding // not recorded /// 0046875 // ephrin receptor binding // traceable author statement /// 0046875 // ephrin receptor binding // inferred from electronic annotation	Efna1	ephrin A1	7.34714	7.60516	7.98598	7.32889	7.69246	7.73526	7.60296	8.17564	0.0313546	839.454	251
1393478_at	---	---	---	---	---	7.88981	7.01739	7.22041	7.30048	7.58103	7.59632	7.31627	7.88543	0.0324563	848.62	252
1388446_at	---	---	---	LOC681410	hypothetical protein LOC681410	10.3641	10.4666	10.4621	10.1559	10.5465	10.5083	10.4822	10.5419	0.0325771	850.412	253
1392013_at	---	---	---	---	---	7.61788	7.37393	7.17063	7.33313	7.65753	7.55146	7.67376	7.52343	0.0329528	853.695	254
1371899_at	0006468 // protein phosphorylation // inferred from electronic annotation /// 0006468 // protein phosphorylation // not recorded /// 0006917 // induction of apoptosis // inferred from electronic annotation /// 0006917 // induction of apoptosis // not recorded /// 0006950 // response to stress // inferred from electronic annotation /// 0006950 // response to stress // not recorded /// 0016310 // p…	0005622 // intracellular // inferred from electronic annotation /// 0005622 // intracellular // not recorded /// 0005737 // cytoplasm // not recorded /// 0005737 // cytoplasm // inferred from sequence or structural similarity /// 0005737 // cytoplasm // inferred from electronic annotation /// 0048471 // perinuclear region of cytoplasm // inferred from electronic annotation	0003723 // RNA binding // inferred from electronic annotation /// 0003725 // double-stranded RNA binding // inferred from electronic annotation /// 0005515 // protein binding // inferred from physical interaction /// 0016301 // kinase activity // inferred from electronic annotation /// 0042803 // protein homodimerization activity // inferred from electronic annotation /// 0042803 // protein homod…	Prkra	protein kinase, interferon inducible double stranded RNA dependent activator	8.73632	8.68406	8.69933	8.95745	8.95082	9.03234	8.86098	9.07166	0.0330157	855.093	255
1393346_at	---	0045111 // intermediate filament cytoskeleton // inferred from electronic annotation /// 0045111 // intermediate filament cytoskeleton // not recorded	---	Ccdc125	coiled-coil domain containing 125	8.61648	8.44465	8.55329	8.13513	8.75622	8.26369	8.64778	8.95316	0.0332773	858.054	256
1370823_at	0007179 // transforming growth factor beta receptor signaling pathway // inferred from expression pattern /// 0008284 // positive regulation of cell proliferation // inferred from electronic annotation /// 0008284 // positive regulation of cell proliferation // not recorded /// 0008360 // regulation of cell shape // inferred from electronic annotation /// 0008360 // regulation of cell shape // no…	0005737 // cytoplasm // inferred from electronic annotation /// 0005737 // cytoplasm // not recorded /// 0005886 // plasma membrane // inferred from electronic annotation /// 0005886 // plasma membrane // not recorded /// 0016020 // membrane // inferred from electronic annotation /// 0016021 // integral to membrane // inferred from electronic annotation	0005109 // frizzled binding // inferred from electronic annotation /// 0005109 // frizzled binding // not recorded	Bambi	BMP and activin membrane-bound inhibitor, homolog (Xenopus laevis)	6.51874	7.2064	7.69634	7.02475	7.07113	7.16591	7.22695	7.81675	0.0332257	858.412	257
1396211_at	---	---	---	---	---	6.32786	6.23994	6.34314	6.45308	6.37754	6.57348	6.54685	6.57862	0.033155	858.806	258
1388440_at	0008152 // metabolic process // not recorded /// 0016485 // protein processing // not recorded /// 0016485 // protein processing // inferred from electronic annotation /// 0043085 // positive regulation of catalytic activity // inferred from electronic annotation	0016021 // integral to membrane // not recorded /// 0016021 // integral to membrane // inferred from electronic annotation /// 0030133 // transport vesicle // not recorded	0004175 // endopeptidase activity // not recorded /// 0008233 // peptidase activity // not recorded	Aph1b /// RGD1559979	anterior pharynx defective 1 homolog B (C. elegans) /// similar to APH1B homolog (C.elegans)	9.22926	9.39433	9.35468	9.37459	9.4486	9.5484	9.50731	9.42342	0.0331158	859.469	259
1369966_a_at	0000462 // maturation of SSU-rRNA from tricistronic rRNA transcript (SSU-rRNA, 5.8S rRNA, LSU-rRNA) // not recorded /// 0006364 // rRNA processing // not recorded /// 0006412 // translation // inferred from electronic annotation /// 0006413 // translational initiation // non-traceable author statement /// 0006414 // translational elongation // not recorded /// 0034101 // erythrocyte homeostasis /…	0005622 // intracellular // inferred from electronic annotation /// 0005634 // nucleus // not recorded /// 0005730 // nucleolus // not recorded /// 0005737 // cytoplasm // not recorded /// 0005840 // ribosome // inferred from electronic annotation /// 0005840 // ribosome // non-traceable author statement /// 0015935 // small ribosomal subunit // not recorded /// 0015935 // small ribosomal subunit…	0000166 // nucleotide binding // inferred from electronic annotation /// 0003735 // structural constituent of ribosome // inferred from electronic annotation /// 0003743 // translation initiation factor activity // non-traceable author statement /// 0031369 // translation initiation factor binding // inferred from physical interaction	LOC100363469 /// Rps24	ribosomal protein S24-like /// ribosomal protein S24	11.1475	11.132	11.1929	11.2542	11.3016	11.3619	11.3191	11.342	0.0338615	865.87	260
1390370_at	---	---	---	---	---	7.962	7.42269	7.31496	7.43064	7.84129	7.73446	7.83004	7.77591	0.0337854	866.383	261
1370067_at	0006108 // malate metabolic process // inferred from electronic annotation /// 0006108 // malate metabolic process // not recorded /// 0006108 // malate metabolic process // inferred from sequence or structural similarity /// 0009725 // response to hormone stimulus // inferred from direct assay /// 0051262 // protein tetramerization // inferred from electronic annotation /// 0051262 // protein te…	0005625 // soluble fraction // inferred from direct assay /// 0005625 // soluble fraction // inferred from electronic annotation /// 0005739 // mitochondrion // inferred from electronic annotation /// 0005739 // mitochondrion // not recorded /// 0005829 // cytosol // inferred from direct assay	0000166 // nucleotide binding // inferred from electronic annotation /// 0004470 // malic enzyme activity // inferred from direct assay /// 0004470 // malic enzyme activity // not recorded /// 0004470 // malic enzyme activity // inferred from sequence or structural similarity /// 0004470 // malic enzyme activity // inferred from electronic annotation /// 0004473 // malate dehydrogenase (oxaloacet…	Me1	malic enzyme 1, NADP(+)-dependent, cytosolic	9.98905	10.2722	10.2493	10.1825	10.1755	10.5928	10.2915	10.5439	0.0349962	876.029	262
1387798_a_at	0001701 // in utero embryonic development // inferred from electronic annotation /// 0001701 // in utero embryonic development // not recorded /// 0006958 // complement activation, classical pathway // inferred from electronic annotation /// 0007275 // multicellular organismal development // inferred from electronic annotation /// 0007565 // female pregnancy // inferred from electronic annotation…	0009897 // external side of plasma membrane // inferred from electronic annotation /// 0009897 // external side of plasma membrane // not recorded /// 0016020 // membrane // inferred from electronic annotation /// 0016021 // integral to membrane // inferred from electronic annotation	0004872 // receptor activity // inferred from electronic annotation	Cr1l	complement component (3b/4b) receptor 1-like	9.91808	9.8861	9.74919	9.77281	9.98331	10.0005	9.95937	10.0328	0.0350875	877.343	263
1370239_at	0001701 // in utero embryonic development // not recorded /// 0006810 // transport // inferred from electronic annotation /// 0010942 // positive regulation of cell death // not recorded /// 0015671 // oxygen transport // inferred by curator /// 0015671 // oxygen transport // inferred from electronic annotation /// 0042542 // response to hydrogen peroxide // not recorded /// 0042744 // hydrogen p…	0005625 // soluble fraction // inferred from direct assay /// 0005833 // hemoglobin complex // not recorded /// 0005833 // hemoglobin complex // inferred from direct assay /// 0005833 // hemoglobin complex // inferred from electronic annotation /// 0022627 // cytosolic small ribosomal subunit // not recorded /// 0031838 // haptoglobin-hemoglobin complex // not recorded	0001540 // beta-amyloid binding // inferred from direct assay /// 0004601 // peroxidase activity // not recorded /// 0005344 // oxygen transporter activity // inferred by curator /// 0005344 // oxygen transporter activity // inferred from electronic annotation /// 0005506 // iron ion binding // inferred from electronic annotation /// 0005515 // protein binding // inferred from physical interactio…	Hba-a2 /// LOC360504	hemoglobin alpha, adult chain 2 /// hemoglobin alpha 2 chain	12.4221	12.9419	12.5033	12.3522	12.8652	12.7816	12.7483	12.7303	0.0353371	879.843	264
1374746_at	---	---	---	---	---	9.58428	8.98118	8.96761	9.29404	9.71737	9.26348	9.18612	9.6733	0.0352302	880.028	265
1388323_at	0006810 // transport // inferred from electronic annotation /// 0009749 // response to glucose stimulus // inferred from expression pattern /// 0022900 // electron transport chain // inferred from electronic annotation	0005739 // mitochondrion // inferred from direct assay /// 0005739 // mitochondrion // not recorded /// 0005739 // mitochondrion // inferred from electronic annotation /// 0005743 // mitochondrial inner membrane // inferred from electronic annotation /// 0005743 // mitochondrial inner membrane // not recorded /// 0005747 // mitochondrial respiratory chain complex I // not recorded /// 0005759 // …	0000166 // nucleotide binding // inferred from electronic annotation /// 0003954 // NADH dehydrogenase activity // not recorded	Ndufa9	NADH dehydrogenase (ubiquinone) 1 alpha subcomplex, 9	10.3132	10.2799	10.2513	10.2787	10.3575	10.4614	10.4194	10.4993	0.0363571	889.717	266
1397924_at	---	---	---	---	---	6.66903	6.59342	6.6054	6.77562	6.83427	6.80781	6.96657	6.74152	0.0364419	890.915	267
1382131_at	---	---	---	---	---	8.09	7.9184	7.94849	8.04027	8.26606	8.34046	8.19604	8.02002	0.0364067	891.671	268
1383248_at	0055114 // oxidation-reduction process // inferred from electronic annotation	0005783 // endoplasmic reticulum // inferred from electronic annotation /// 0005789 // endoplasmic reticulum membrane // inferred from electronic annotation /// 0005792 // microsome // inferred from electronic annotation /// 0016020 // membrane // inferred from electronic annotation /// 0016021 // integral to membrane // inferred from electronic annotation /// 0031227 // intrinsic to endoplasmic …	0004497 // monooxygenase activity // inferred from electronic annotation /// 0004499 // N,N-dimethylaniline monooxygenase activity // inferred from direct assay /// 0004499 // N,N-dimethylaniline monooxygenase activity // inferred from electronic annotation /// 0016491 // oxidoreductase activity // inferred from electronic annotation /// 0050660 // flavin adenine dinucleotide binding // inferred …	Fmo5	flavin containing monooxygenase 5	7.02667	6.21161	6.11169	7.61106	6.93129	6.86464	7.6607	6.34352	0.0362937	891.774	269
1378315_at	---	---	---	---	---	9.19349	8.83907	8.93763	9.36752	9.39512	9.45069	9.22741	9.17854	0.0362852	892.806	270
1393508_at	---	---	---	---	---	10.2983	10.0505	9.84658	9.79068	10.6194	10.1068	10.0704	10.0819	0.0367269	896.768	271
1385014_at	0008152 // metabolic process // not recorded	---	0008486 // diphosphoinositol-polyphosphate diphosphatase activity // not recorded /// 0016787 // hydrolase activity // inferred from electronic annotation	RGD1564763	similar to nudix (nucleoside diphosphate linked moiety X)-type motif 11	5.88977	6.68179	6.62306	5.81526	6.66965	6.03659	6.29564	6.77383	0.0378824	905.637	272
1376189_at	---	---	0003676 // nucleic acid binding // inferred from electronic annotation /// 0008270 // zinc ion binding // inferred from electronic annotation /// 0046983 // protein dimerization activity // inferred from electronic annotation	Zmym1	zinc finger, MYM-type 1	7.63595	7.48411	7.57454	7.55461	7.72889	7.72088	7.69396	7.70537	0.0388608	912.867	273
1374184_at	0006546 // glycine catabolic process // inferred from electronic annotation	0005737 // cytoplasm // inferred from electronic annotation /// 0005739 // mitochondrion // inferred from electronic annotation	0004047 // aminomethyltransferase activity // inferred from electronic annotation	RGD1306000	similar to CG8043-PA	8.05404	8.05962	8.11343	8.00856	8.06808	8.40259	8.22371	8.22661	0.0389416	914.258	274
1372292_at	---	---	---	---	---	8.79601	8.75556	8.50804	8.34586	8.62769	8.81239	8.89335	8.8845	0.0388618	914.562	275
1383300_at	---	0005737 // cytoplasm // inferred from electronic annotation /// 0030424 // axon // inferred from electronic annotation /// 0042995 // cell projection // inferred from electronic annotation /// 0043204 // perikaryon // inferred from electronic annotation	---	Klhl24	kelch-like 24 (Drosophila)	9.03651	8.70937	8.54394	8.76389	9.04905	9.018	8.99728	8.99013	0.0387464	914.776	276
1377821_at	---	---	---	---	---	9.96979	9.62716	9.67818	9.59242	9.94616	9.89982	10.095	9.90406	0.0396931	922.038	277
1374932_at	---	---	---	LOC100361444	rCG31799-like	8.46112	7.92188	8.8112	8.91637	8.66167	8.30816	8.79911	9.58409	0.0400719	925.347	278
1386093_at	0006355 // regulation of transcription, DNA-dependent // inferred from electronic annotation	0005622 // intracellular // inferred from electronic annotation	0003676 // nucleic acid binding // inferred from electronic annotation /// 0008270 // zinc ion binding // inferred from electronic annotation /// 0046872 // metal ion binding // inferred from electronic annotation	Zfp324	Zinc finger protein 324	6.72668	6.65756	6.99865	6.55838	6.74531	7.07743	7.03234	6.77506	0.0400753	926.347	279
1371249_at	0002070 // epithelial cell maturation // not recorded /// 0002070 // epithelial cell maturation // inferred from electronic annotation /// 0006351 // transcription, DNA-dependent // inferred from electronic annotation /// 0006355 // regulation of transcription, DNA-dependent // inferred from direct assay /// 0006355 // regulation of transcription, DNA-dependent // traceable author statement /// 0…	0005634 // nucleus // inferred from direct assay /// 0005634 // nucleus // inferred from electronic annotation /// 0005634 // nucleus // not recorded /// 0005634 // nucleus // traceable author statement	0003677 // DNA binding // traceable author statement /// 0003677 // DNA binding // inferred from electronic annotation /// 0003700 // sequence-specific DNA binding transcription factor activity // inferred from direct assay /// 0003700 // sequence-specific DNA binding transcription factor activity // inferred from electronic annotation /// 0003700 // sequence-specific DNA binding transcription fa…	Xbp1	X-box binding protein 1	12.0418	10.9451	11.0485	11.4986	11.6953	11.7448	11.6991	11.2667	0.0401393	927.671	280
1375896_at	0000902 // cell morphogenesis // not recorded /// 0000902 // cell morphogenesis // inferred from electronic annotation /// 0006468 // protein phosphorylation // not recorded /// 0006468 // protein phosphorylation // inferred from electronic annotation /// 0006611 // protein export from nucleus // not recorded /// 0006611 // protein export from nucleus // inferred from electronic annotation /// 00…	0005634 // nucleus // not recorded /// 0005634 // nucleus // inferred from electronic annotation /// 0005737 // cytoplasm // not recorded /// 0005737 // cytoplasm // inferred from electronic annotation	0004672 // protein kinase activity // inferred from electronic annotation /// 0004672 // protein kinase activity // not recorded /// 0005524 // ATP binding // inferred from electronic annotation /// 0016301 // kinase activity // inferred from electronic annotation /// 0016772 // transferase activity, transferring phosphorus-containing groups // inferred from electronic annotation	Stradb	STE20-related kinase adaptor beta	10.0356	9.90538	9.88266	10.0415	10.0536	10.1779	10.1406	10.0708	0.040121	928.543	281
1386718_at	0055114 // oxidation-reduction process // inferred from electronic annotation	---	0016491 // oxidoreductase activity // inferred from electronic annotation	Akr1c19	aldo-keto reductase family 1, member C19	8.20633	7.47192	7.19924	7.4634	8.04098	7.91185	7.66248	7.49479	0.0400638	928.976	282
1388889_at	0001541 // ovarian follicle development // inferred from mutant phenotype /// 0006508 // proteolysis // inferred from electronic annotation	0005783 // endoplasmic reticulum // inferred from direct assay /// 0005783 // endoplasmic reticulum // inferred from electronic annotation /// 0005789 // endoplasmic reticulum membrane // inferred from electronic annotation /// 0016020 // membrane // inferred from electronic annotation /// 0016021 // integral to membrane // inferred from electronic annotation	0008233 // peptidase activity // inferred from electronic annotation /// 0008237 // metallopeptidase activity // inferred from electronic annotation /// 0016787 // hydrolase activity // inferred from electronic annotation /// 0046872 // metal ion binding // inferred from electronic annotation	Ermp1	endoplasmic reticulum metallopeptidase 1	7.93843	8.10131	8.12147	7.9975	8.0937	8.37427	8.13395	8.33792	0.040477	932.734	283
1387154_at	0007218 // neuropeptide signaling pathway // inferred from electronic annotation /// 0007218 // neuropeptide signaling pathway // inferred from mutant phenotype /// 0007268 // synaptic transmission // inferred from direct assay /// 0007631 // feeding behavior // non-traceable author statement /// 0008217 // regulation of blood pressure // not recorded /// 0008217 // regulation of blood pressure /…	0005576 // extracellular region // inferred from electronic annotation /// 0005615 // extracellular space // inferred from direct assay	0001664 // G-protein coupled receptor binding // not recorded /// 0001664 // G-protein coupled receptor binding // traceable author statement /// 0001664 // G-protein coupled receptor binding // inferred from electronic annotation /// 0004983 // neuropeptide Y receptor activity // traceable author statement /// 0005179 // hormone activity // inferred from electronic annotation /// 0031841 // neur…	Npy	neuropeptide Y	7.01202	7.08304	6.84636	7.04908	6.98991	7.25447	7.22824	7.42816	0.0405106	934.097	284
1373421_at	0000122 // negative regulation of transcription from RNA polymerase II promoter // inferred from electronic annotation /// 0000122 // negative regulation of transcription from RNA polymerase II promoter // not recorded /// 0001843 // neural tube closure // inferred from electronic annotation /// 0001843 // neural tube closure // not recorded /// 0006355 // regulation of transcription, DNA-depende…	0005634 // nucleus // inferred from direct assay /// 0005634 // nucleus // inferred from electronic annotation	0003677 // DNA binding // inferred from electronic annotation /// 0003682 // chromatin binding // inferred from electronic annotation /// 0003682 // chromatin binding // not recorded /// 0003700 // sequence-specific DNA binding transcription factor activity // inferred from electronic annotation /// 0043565 // sequence-specific DNA binding // inferred from electronic annotation /// 0070410 // co-…	Tgif1	TGFB-induced factor homeobox 1	8.30512	8.40154	8.89273	7.96936	8.55407	8.51997	8.61583	8.64506	0.0409333	937.596	285
1380665_at	---	---	---	---	---	10.2242	10.0127	9.6756	9.90508	10.2942	10.1589	10.295	10.0055	0.0407937	937.628	286
1370909_at	0006351 // transcription, DNA-dependent // not recorded /// 0006351 // transcription, DNA-dependent // inferred from sequence or structural similarity /// 0006810 // transport // inferred from electronic annotation /// 0007166 // cell surface receptor signaling pathway // not recorded /// 0007166 // cell surface receptor signaling pathway // inferred from sequence or structural similarity /// 000…	0000922 // spindle pole // inferred from electronic annotation /// 0005634 // nucleus // inferred from electronic annotation /// 0005635 // nuclear envelope // not recorded /// 0005643 // nuclear pore // not recorded /// 0005643 // nuclear pore // inferred from sequence or structural similarity /// 0005643 // nuclear pore // inferred from electronic annotation /// 0005737 // cytoplasm // inferred…	0005515 // protein binding // inferred from physical interaction /// 0017056 // structural constituent of nuclear pore // inferred from electronic annotation /// 0030159 // receptor signaling complex scaffold activity // not recorded /// 0030159 // receptor signaling complex scaffold activity // inferred from sequence or structural similarity /// 0042169 // SH2 domain binding // not recorded /// …	Nup62	nucleoporin 62	8.1881	8.03677	7.84907	7.75779	8.26939	8.41965	8.11872	7.91247	0.040993	940.057	287
1371481_at	---	0016020 // membrane // inferred from electronic annotation /// 0016021 // integral to membrane // inferred from electronic annotation	---	Reep5	receptor accessory protein 5	9.01892	9.14992	8.98468	8.92779	9.18273	9.31197	9.04965	9.20405	0.0410243	941.359	288
1383282_at	---	0005634 // nucleus // inferred from electronic annotation /// 0005634 // nucleus // not recorded /// 0005730 // nucleolus // not recorded /// 0005737 // cytoplasm // inferred from electronic annotation /// 0005737 // cytoplasm // not recorded	0003676 // nucleic acid binding // inferred from electronic annotation	Thap11	THAP domain containing 11	8.27849	8.12901	8.04277	7.99638	8.33711	8.29757	8.14044	8.37191	0.0411453	943.053	289
1369073_at	0000122 // negative regulation of transcription from RNA polymerase II promoter // inferred from mutant phenotype /// 0000122 // negative regulation of transcription from RNA polymerase II promoter // not recorded /// 0000122 // negative regulation of transcription from RNA polymerase II promoter // inferred from electronic annotation /// 0006109 // regulation of carbohydrate metabolic process //…	0005634 // nucleus // inferred from direct assay /// 0005634 // nucleus // inferred from electronic annotation /// 0005719 // nuclear euchromatin // not recorded /// 0005719 // nuclear euchromatin // inferred from electronic annotation	0000980 // RNA polymerase II distal enhancer sequence-specific DNA binding // not recorded /// 0000980 // RNA polymerase II distal enhancer sequence-specific DNA binding // inferred from electronic annotation /// 0001190 // RNA polymerase II transcription factor binding transcription factor activity involved in positive regulation of transcription // not recorded /// 0001190 // RNA polymerase II …	Nr1h4	nuclear receptor subfamily 1, group H, member 4	9.34093	9.36259	9.5665	9.38605	9.47388	9.58636	9.4551	9.89542	0.0412793	944.633	290
1370282_at	0007275 // multicellular organismal development // inferred from electronic annotation /// 0030154 // cell differentiation // inferred from electronic annotation /// 0045445 // myoblast differentiation // inferred from expression pattern	0005634 // nucleus // inferred from direct assay /// 0005634 // nucleus // inferred from electronic annotation	0008270 // zinc ion binding // inferred from electronic annotation /// 0046872 // metal ion binding // inferred from electronic annotation	Csrp2	cysteine and glycine-rich protein 2	7.46939	7.26864	7.49154	7.65267	7.56459	7.72559	7.7587	7.57216	0.0412646	945.432	291
1390173_at	---	---	---	---	---	7.82346	8.07486	7.7697	7.87745	7.95733	8.19385	8.19984	7.904	0.0411438	945.523	292
1392812_at	---	---	---	---	---	7.56477	7.25395	7.32312	7.23386	7.84301	7.46855	7.47712	7.49655	0.0410034	945.535	293
1369666_at	0006072 // glycerol-3-phosphate metabolic process // inferred from direct assay /// 0006072 // glycerol-3-phosphate metabolic process // not recorded /// 0006072 // glycerol-3-phosphate metabolic process // inferred from electronic annotation /// 0006094 // gluconeogenesis // not recorded /// 0006094 // gluconeogenesis // inferred from electronic annotation /// 0006734 // NADH metabolic process /…	0005739 // mitochondrion // inferred from electronic annotation /// 0005739 // mitochondrion // not recorded /// 0005743 // mitochondrial inner membrane // not recorded /// 0005743 // mitochondrial inner membrane // inferred from electronic annotation /// 0009331 // glycerol-3-phosphate dehydrogenase complex // inferred from electronic annotation	0004367 // glycerol-3-phosphate dehydrogenase [NAD+] activity // inferred from direct assay /// 0004368 // glycerol-3-phosphate dehydrogenase activity // inferred from electronic annotation /// 0005509 // calcium ion binding // inferred from electronic annotation /// 0016491 // oxidoreductase activity // inferred from electronic annotation /// 0052590 // sn-glycerol-3-phosphate:ubiquinone oxidore…	Gpd2	glycerol-3-phosphate dehydrogenase 2, mitochondrial	8.01889	7.54824	7.65859	7.54804	7.69329	7.69535	7.91919	8.29305	0.0408946	945.687	294
1368695_at	0006958 // complement activation, classical pathway // inferred from electronic annotation /// 0045087 // innate immune response // inferred from electronic annotation	0005576 // extracellular region // inferred from electronic annotation	---	C4bpb	complement component 4 binding protein, beta	11.404	11.5009	11.462	11.6648	11.5566	11.7885	11.5871	11.8276	0.0414	949.758	295
1373140_at	0005977 // glycogen metabolic process // inferred from electronic annotation /// 0005977 // glycogen metabolic process // not recorded /// 0006642 // triglyceride mobilization // inferred from mutant phenotype /// 0007165 // signal transduction // not recorded /// 0007165 // signal transduction // inferred from electronic annotation /// 0007584 // response to nutrient // inferred from expression …	0005615 // extracellular space // inferred from electronic annotation /// 0005615 // extracellular space // not recorded /// 0005896 // interleukin-6 receptor complex // inferred from electronic annotation /// 0005896 // interleukin-6 receptor complex // not recorded /// 0005900 // oncostatin-M receptor complex // inferred from electronic annotation /// 0005900 // oncostatin-M receptor complex //…	0004872 // receptor activity // inferred from electronic annotation /// 0004896 // cytokine receptor activity // inferred from electronic annotation /// 0004897 // ciliary neurotrophic factor receptor activity // not recorded /// 0004897 // ciliary neurotrophic factor receptor activity // inferred from electronic annotation /// 0004915 // interleukin-6 receptor activity // inferred from electroni…	Il6st	interleukin 6 signal transducer	10.4916	9.83031	9.66698	9.73925	10.1669	10.0226	10.299	10.0416	0.0415946	951.81	296
1371540_at	---	0008250 // oligosaccharyltransferase complex // inferred from electronic annotation /// 0008250 // oligosaccharyltransferase complex // not recorded /// 0016020 // membrane // inferred from electronic annotation /// 0016021 // integral to membrane // inferred from electronic annotation	---	Krtcap2	keratinocyte associated protein 2	10.0469	10.0721	10.0922	10.0257	10.1754	10.2012	10.1394	10.2743	0.0417138	953.609	297
1390944_at	0006810 // transport // inferred from electronic annotation /// 0015031 // protein transport // inferred from electronic annotation	0005737 // cytoplasm // inferred from electronic annotation /// 0005768 // endosome // inferred from electronic annotation /// 0005829 // cytosol // inferred from electronic annotation /// 0016020 // membrane // inferred from electronic annotation /// 0031902 // late endosome membrane // inferred from electronic annotation	---	Chmp4c	charged multivesicular body protein 4C	7.63616	7.11233	7.37823	7.3613	7.50363	7.3173	7.64216	8.07704	0.0416644	954.318	298
1390832_at	---	0016021 // integral to membrane // inferred from electronic annotation	---	Tmcc3	transmembrane and coiled-coil domain family 3	9.11846	9.4603	9.36305	9.04551	9.54717	9.40107	9.52623	9.30149	0.0418428	956.655	299
1372340_at	0006556 // S-adenosylmethionine biosynthetic process // inferred from electronic annotation /// 0006556 // S-adenosylmethionine biosynthetic process // not recorded /// 0006730 // one-carbon metabolic process // inferred from electronic annotation /// 0045226 // extracellular polysaccharide biosynthetic process // inferred from electronic annotation	0005634 // nucleus // not recorded /// 0005739 // mitochondrion // not recorded /// 0048269 // methionine adenosyltransferase complex // not recorded	0000166 // nucleotide binding // inferred from electronic annotation /// 0008831 // dTDP-4-dehydrorhamnose reductase activity // inferred from electronic annotation /// 0048270 // methionine adenosyltransferase regulator activity // not recorded	Mat2b	methionine adenosyltransferase II, beta	9.58259	9.45434	9.53384	9.58217	9.63459	9.68784	9.66618	9.72043	0.0417133	956.704	300
1368007_at	0001824 // blastocyst development // not recorded /// 0001833 // inner cell mass cell proliferation // not recorded /// 0006810 // transport // inferred from electronic annotation /// 0007275 // multicellular organismal development // inferred from electronic annotation /// 0009611 // response to wounding // inferred from expression pattern /// 0010033 // response to organic substance // inferred…	0005576 // extracellular region // inferred from electronic annotation /// 0005578 // proteinaceous extracellular matrix // not recorded /// 0005622 // intracellular // not recorded /// 0005737 // cytoplasm // not recorded /// 0016020 // membrane // inferred from electronic annotation /// 0016021 // integral to membrane // inferred from electronic annotation /// 0019898 // extrinsic to membrane /…	0005044 // scavenger receptor activity // inferred from electronic annotation /// 0035375 // zymogen binding // not recorded /// 0035375 // zymogen binding // inferred from sequence or structural similarity /// 0051636 // Gram-negative bacterial cell surface binding // not recorded /// 0051636 // Gram-negative bacterial cell surface binding // inferred from sequence or structural similarity /// 0…	Dmbt1	deleted in malignant brain tumors 1	7.72407	8.06816	7.24935	7.25269	7.78099	7.88302	7.74103	7.76266	0.041588	956.797	301
1370957_at	0005977 // glycogen metabolic process // inferred from electronic annotation /// 0005977 // glycogen metabolic process // not recorded /// 0006642 // triglyceride mobilization // inferred from mutant phenotype /// 0007165 // signal transduction // not recorded /// 0007165 // signal transduction // inferred from electronic annotation /// 0007584 // response to nutrient // inferred from expression …	0005615 // extracellular space // inferred from electronic annotation /// 0005615 // extracellular space // not recorded /// 0005896 // interleukin-6 receptor complex // inferred from electronic annotation /// 0005896 // interleukin-6 receptor complex // not recorded /// 0005900 // oncostatin-M receptor complex // inferred from electronic annotation /// 0005900 // oncostatin-M receptor complex //…	0004872 // receptor activity // inferred from electronic annotation /// 0004896 // cytokine receptor activity // inferred from electronic annotation /// 0004897 // ciliary neurotrophic factor receptor activity // not recorded /// 0004897 // ciliary neurotrophic factor receptor activity // inferred from electronic annotation /// 0004915 // interleukin-6 receptor activity // inferred from electroni…	Il6st	interleukin 6 signal transducer	11.7062	11.0381	10.9759	11.0725	11.4625	11.2973	11.5193	11.3561	0.0417881	959.103	302
1375173_at	0016042 // lipid catabolic process // inferred from electronic annotation	0005764 // lysosome // not recorded /// 0005764 // lysosome // inferred from electronic annotation /// 0043202 // lysosomal lumen // inferred from electronic annotation	0016787 // hydrolase activity // inferred from electronic annotation	Plbd2	phospholipase B domain containing 2	9.4147	9.57023	9.47118	9.3776	9.46159	9.77741	9.68325	9.66102	0.0417921	960.557	303
1371307_at	0006414 // translational elongation // inferred from electronic annotation	0005622 // intracellular // inferred from electronic annotation /// 0005737 // cytoplasm // not recorded /// 0005840 // ribosome // inferred from electronic annotation /// 0022625 // cytosolic large ribosomal subunit // not recorded /// 0030529 // ribonucleoprotein complex // inferred from electronic annotation	0003735 // structural constituent of ribosome // inferred from electronic annotation	LOC100360522 /// RGD1564744 /// Rplp1	ribosomal protein P1-like /// similar to 60S acidic ribosomal protein P1 /// ribosomal protein, large, P1	11.6694	11.798	11.7865	11.8442	11.8683	11.9131	11.8919	11.9218	0.0426908	967.051	304
1381445_at	---	---	---	---	---	6.76035	6.95576	7.74441	7.09498	7.10133	7.32451	6.62254	8.15232	0.0426131	967.459	305
1378960_at	---	---	---	---	---	8.31684	8.01619	8.23557	9.46498	8.49318	8.21893	9.12853	8.79071	0.0425882	968.429	306
1382924_at	0015937 // coenzyme A biosynthetic process // inferred from electronic annotation /// 0016310 // phosphorylation // not recorded /// 0016310 // phosphorylation // inferred from electronic annotation	0005634 // nucleus // not recorded /// 0005634 // nucleus // inferred from electronic annotation /// 0005730 // nucleolus // not recorded /// 0005737 // cytoplasm // not recorded /// 0005737 // cytoplasm // inferred from electronic annotation /// 0071944 // cell periphery // not recorded /// 0071944 // cell periphery // inferred from electronic annotation	0004594 // pantothenate kinase activity // inferred from electronic annotation /// 0004594 // pantothenate kinase activity // not recorded /// 0005524 // ATP binding // inferred from electronic annotation /// 0016301 // kinase activity // inferred from electronic annotation	Pank1	pantothenate kinase 1	9.99804	10.0604	10.0486	9.92048	10.1811	10.0841	10.0958	10.2087	0.0427915	970.973	307
1373238_at	0006351 // transcription, DNA-dependent // inferred from electronic annotation /// 0006355 // regulation of transcription, DNA-dependent // inferred from electronic annotation /// 0043966 // histone H3 acetylation // inferred from electronic annotation /// 0043966 // histone H3 acetylation // not recorded	0005634 // nucleus // inferred from electronic annotation /// 0030914 // STAGA complex // inferred from electronic annotation /// 0030914 // STAGA complex // not recorded /// 0070461 // SAGA-type complex // inferred from electronic annotation	0003713 // transcription coactivator activity // inferred from electronic annotation /// 0003713 // transcription coactivator activity // not recorded /// 0004402 // histone acetyltransferase activity // inferred from electronic annotation /// 0004402 // histone acetyltransferase activity // not recorded	Tada1	transcriptional adaptor 1	8.34214	8.19607	8.24847	8.23376	8.48354	8.5757	8.35362	8.25162	0.042987	973.198	308
1379473_at	---	---	---	Larp1b	La ribonucleoprotein domain family, member 1B	8.85825	8.60039	8.68485	8.6271	8.86476	8.79623	8.88203	8.91627	0.0430841	975.128	309
1389498_at	0006508 // proteolysis // not recorded /// 0006508 // proteolysis // inferred from sequence or structural similarity /// 0006508 // proteolysis // inferred from electronic annotation /// 0016485 // protein processing // not recorded /// 0016485 // protein processing // inferred from sequence or structural similarity /// 0016485 // protein processing // inferred from electronic annotation /// 0031…	0005777 // peroxisome // not recorded /// 0005777 // peroxisome // inferred from sequence or structural similarity /// 0005777 // peroxisome // inferred from electronic annotation	0002020 // protease binding // inferred from electronic annotation /// 0002020 // protease binding // not recorded /// 0003824 // catalytic activity // inferred from electronic annotation /// 0004252 // serine-type endopeptidase activity // not recorded /// 0004252 // serine-type endopeptidase activity // inferred from sequence or structural similarity /// 0004252 // serine-type endopeptidase act…	Tysnd1	trypsin domain containing 1	9.33222	9.0782	9.12951	8.97031	9.31118	9.3705	9.29596	9.35475	0.0430774	976.18	310
1374254_a_at	---	---	---	Tmem205	transmembrane protein 205	11.5586	11.5366	11.49	11.4764	11.693	11.6629	11.574	11.6864	0.0432797	978.627	311
1374919_at	0000122 // negative regulation of transcription from RNA polymerase II promoter // inferred from direct assay /// 0006260 // DNA replication // inferred from electronic annotation /// 0045892 // negative regulation of transcription, DNA-dependent // inferred from mutant phenotype /// 0045893 // positive regulation of transcription, DNA-dependent // inferred from mutant phenotype	0005634 // nucleus // inferred from direct assay /// 0005634 // nucleus // not recorded /// 0005634 // nucleus // inferred from electronic annotation /// 0005663 // DNA replication factor C complex // not recorded /// 0005663 // DNA replication factor C complex // inferred from electronic annotation /// 0005730 // nucleolus // inferred from direct assay /// 0005737 // cytoplasm // inferred from d…	0000166 // nucleotide binding // inferred from electronic annotation /// 0003677 // DNA binding // inferred from electronic annotation /// 0003689 // DNA clamp loader activity // inferred from electronic annotation /// 0003690 // double-stranded DNA binding // inferred from direct assay /// 0004872 // receptor activity // inferred from electronic annotation /// 0005515 // protein binding // infer…	Rfc1	replication factor C (activator 1) 1	8.78595	8.81096	8.66509	8.51547	8.85653	8.79627	8.83323	8.97817	0.0433462	979.635	312
1387006_at	0006629 // lipid metabolic process // inferred from electronic annotation /// 0008202 // steroid metabolic process // inferred from electronic annotation	0005737 // cytoplasm // inferred from electronic annotation	0004027 // alcohol sulfotransferase activity // inferred from electronic annotation /// 0008146 // sulfotransferase activity // inferred from electronic annotation /// 0016740 // transferase activity // inferred from electronic annotation	Sult2al1	sulfotransferase family 2A, dehydroepiandrosterone (DHEA)-preferring-like 1	8.26009	8.07434	7.9489	9.05467	8.31336	9.0506	8.51743	8.19324	0.0434441	981.165	313
1367609_at	0001516 // prostaglandin biosynthetic process // not recorded /// 0001934 // positive regulation of protein phosphorylation // not recorded /// 0001942 // hair follicle development // inferred from expression pattern /// 0002035 // brain renin-angiotensin system // inferred from mutant phenotype /// 0002675 // positive regulation of acute inflammatory response // inferred from mutant phenotype //…	0005576 // extracellular region // not recorded /// 0005576 // extracellular region // inferred from electronic annotation /// 0005615 // extracellular space // inferred from direct assay /// 0005615 // extracellular space // not recorded /// 0005615 // extracellular space // inferred from electronic annotation /// 0005634 // nucleus // inferred from direct assay /// 0005737 // cytoplasm // infer…	0004167 // dopachrome isomerase activity // not recorded /// 0004167 // dopachrome isomerase activity // inferred from sequence or structural similarity /// 0004167 // dopachrome isomerase activity // inferred from electronic annotation /// 0005102 // receptor binding // not recorded /// 0005125 // cytokine activity // inferred from electronic annotation /// 0005125 // cytokine activity // not re…	Mif	macrophage migration inhibitory factor	10.6522	10.3422	10.4937	10.3956	10.6234	10.8061	10.6546	10.5937	0.0438057	984.18	314
1375532_at	---	---	---	---	---	8.85323	8.86221	9.01974	9.3086	8.969	9.03955	9.03619	9.94467	0.0437397	984.742	315
1388395_at	0006915 // apoptotic process // not recorded /// 0006915 // apoptotic process // inferred from sequence or structural similarity /// 0006915 // apoptotic process // inferred from electronic annotation /// 0007049 // cell cycle // inferred from electronic annotation /// 0043065 // positive regulation of apoptotic process // not recorded /// 0043065 // positive regulation of apoptotic process // in…	0005739 // mitochondrion // not recorded /// 0005739 // mitochondrion // inferred from sequence or structural similarity /// 0005739 // mitochondrion // inferred from electronic annotation	---	G0s2	G0/G1switch 2	11.7702	11.7307	11.6367	11.338	11.8584	11.7517	11.6333	12.2945	0.0439968	986.94	316
1380389_at	---	---	---	---	---	7.78475	7.81429	7.78992	7.95657	7.90262	7.92485	8.0091	8.25515	0.0443849	990.067	317
1383732_at	0008152 // metabolic process // inferred from electronic annotation	---	0004364 // glutathione transferase activity // inferred from electronic annotation	RGD1307603	similar to hypothetical protein MGC37914	10.6477	11.0606	11.2216	11.0484	11.2529	11.0677	10.9974	11.5247	0.0443239	990.682	318
1384478_at	0006355 // regulation of transcription, DNA-dependent // inferred from electronic annotation /// 0007379 // segment specification // not recorded /// 0007379 // segment specification // inferred from electronic annotation /// 0009952 // anterior/posterior pattern specification // not recorded /// 0009952 // anterior/posterior pattern specification // inferred from electronic annotation /// 009009…	0005634 // nucleus // inferred from electronic annotation	---	Mllt3	myeloid/lymphoid or mixed-lineage leukemia (trithorax homolog, Drosophila); translocated to, 3	6.58486	6.46698	6.6334	6.55885	6.72361	6.83102	6.53921	7.02932	0.04421	990.837	319
1368336_at	0006810 // transport // inferred from electronic annotation /// 0022900 // electron transport chain // inferred from electronic annotation /// 0030325 // adrenal gland development // inferred from expression pattern /// 0034698 // response to gonadotropin stimulus // inferred from expression pattern /// 0044320 // cellular response to leptin stimulus // inferred from expression pattern /// 004432…	0005739 // mitochondrion // inferred from direct assay /// 0005739 // mitochondrion // not recorded /// 0005739 // mitochondrion // inferred from electronic annotation /// 0005759 // mitochondrial matrix // inferred from electronic annotation /// 0030061 // mitochondrial crista // inferred from direct assay	0005506 // iron ion binding // inferred from direct assay /// 0008386 // cholesterol monooxygenase (side-chain-cleaving) activity // inferred from direct assay /// 0009055 // electron carrier activity // inferred from direct assay /// 0009055 // electron carrier activity // inferred from electronic annotation /// 0015039 // NADPH-adrenodoxin reductase activity // inferred from direct assay /// 00…	Fdx1	ferredoxin 1	11.0619	11.0032	10.9762	10.8905	11.0898	11.0118	11.1925	11.2878	0.044875	996.322	320
1373108_at	0005975 // carbohydrate metabolic process // inferred from electronic annotation /// 0005977 // glycogen metabolic process // not recorded /// 0005977 // glycogen metabolic process // inferred from electronic annotation /// 0005978 // glycogen biosynthetic process // inferred from electronic annotation /// 0005978 // glycogen biosynthetic process // not recorded /// 0005979 // regulation of glyco…	0005625 // soluble fraction // inferred from direct assay /// 0005792 // microsome // inferred from direct assay /// 0042587 // glycogen granule // inferred from direct assay	0004721 // phosphoprotein phosphatase activity // inferred from direct assay /// 0019899 // enzyme binding // inferred from mutant phenotype /// 0019903 // protein phosphatase binding // not recorded	Ppp1r3c	protein phosphatase 1, regulatory subunit 3C	10.1616	11.822	11.0442	9.34624	10.5326	10.7606	10.456	10.8389	0.0448318	997.077	321
1387323_at	0006508 // proteolysis // inferred from electronic annotation /// 0006954 // inflammatory response // inferred from electronic annotation /// 0007596 // blood coagulation // inferred from electronic annotation /// 0007599 // hemostasis // inferred from electronic annotation /// 0031639 // plasminogen activation // inferred from electronic annotation /// 0031639 // plasminogen activation // not re…	0005576 // extracellular region // inferred from electronic annotation /// 0005615 // extracellular space // inferred from electronic annotation /// 0005615 // extracellular space // not recorded	0003824 // catalytic activity // inferred from electronic annotation /// 0004252 // serine-type endopeptidase activity // inferred from electronic annotation /// 0008233 // peptidase activity // inferred from electronic annotation /// 0008236 // serine-type peptidase activity // inferred from electronic annotation /// 0016787 // hydrolase activity // inferred from electronic annotation	Klkb1	kallikrein B, plasma 1	11.4751	11.1156	11.2112	11.6815	11.6687	11.5859	11.6051	11.5852	0.0449099	998.258	322
1367640_at	0006412 // translation // inferred from electronic annotation	0005622 // intracellular // inferred from electronic annotation /// 0005737 // cytoplasm // inferred from electronic annotation /// 0005840 // ribosome // inferred from electronic annotation /// 0022627 // cytosolic small ribosomal subunit // inferred from direct assay /// 0022627 // cytosolic small ribosomal subunit // not recorded /// 0030529 // ribonucleoprotein complex // inferred from electr…	0003735 // structural constituent of ribosome // inferred from electronic annotation	LOC100359593 /// LOC100360558 /// LOC100360573 /// LOC100360642 /// LOC100363860 /// LOC100364427 /// LOC100364858 /// LOC689481 /// Rps12	ribosomal protein S12-like /// ribosomal protein S12-like /// ribosomal protein S12-like /// ribosomal protein S12-like /// ribosomal protein S12-like /// ribosomal protein S12-like /// ribosomal protein S12-like /// similar to ribosomal protein S12 /// ribosomal protein S12	11.4403	11.5112	11.5758	11.6195	11.6477	11.6747	11.6324	11.6577	0.0450341	1000.36	323
1371464_at	0006625 // protein targeting to peroxisome // inferred from sequence or structural similarity /// 0007165 // signal transduction // not recorded /// 0042981 // regulation of apoptotic process // not recorded /// 0042981 // regulation of apoptotic process // inferred from sequence or structural similarity /// 0043122 // regulation of I-kappaB kinase/NF-kappaB cascade // not recorded /// 0043122 //…	---	0003677 // DNA binding // inferred from electronic annotation /// 0008270 // zinc ion binding // inferred from electronic annotation /// 0031593 // polyubiquitin binding // inferred from sequence or structural similarity /// 0046872 // metal ion binding // inferred from electronic annotation	Zfand6	zinc finger, AN1-type domain 6	11.1422	11.0641	11.0288	11.0369	11.1718	11.1802	11.2436	11.2202	0.0452346	1002.1	324
1374624_at	0005975 // carbohydrate metabolic process // inferred from electronic annotation /// 0006486 // protein glycosylation // inferred from electronic annotation	0000139 // Golgi membrane // inferred from electronic annotation /// 0005794 // Golgi apparatus // inferred from electronic annotation /// 0016020 // membrane // inferred from electronic annotation /// 0016021 // integral to membrane // inferred from electronic annotation	0004653 // polypeptide N-acetylgalactosaminyltransferase activity // inferred from electronic annotation /// 0016740 // transferase activity // inferred from electronic annotation /// 0016757 // transferase activity, transferring glycosyl groups // inferred from electronic annotation /// 0030246 // carbohydrate binding // inferred from electronic annotation	Galnt11	UDP-N-acetyl-alpha-D-galactosamine:polypeptide N-acetylgalactosaminyltransferase 11 (GalNAc-T11)	9.60879	9.44201	9.34768	9.29191	9.49396	9.54721	9.70406	9.70423	0.0450985	1002.12	325
1388370_at	---	---	---	Ccni	cyclin I	10.2937	10.1237	10.1348	10.3041	10.3472	10.3946	10.3413	10.305	0.0455521	1006.25	326
1383554_at	0016567 // protein ubiquitination // not recorded /// 0016567 // protein ubiquitination // inferred from electronic annotation /// 0042036 // negative regulation of cytokine biosynthetic process // inferred from electronic annotation /// 0042036 // negative regulation of cytokine biosynthetic process // not recorded	0005770 // late endosome // inferred from electronic annotation /// 0005770 // late endosome // not recorded /// 0005783 // endoplasmic reticulum // inferred from electronic annotation /// 0005783 // endoplasmic reticulum // not recorded /// 0005794 // Golgi apparatus // inferred from electronic annotation /// 0005794 // Golgi apparatus // not recorded	0004842 // ubiquitin-protein ligase activity // inferred from electronic annotation /// 0004842 // ubiquitin-protein ligase activity // not recorded /// 0008270 // zinc ion binding // inferred from electronic annotation /// 0046872 // metal ion binding // inferred from electronic annotation	Rnf128	ring finger protein 128	8.90445	8.74776	8.85045	8.93336	8.9699	9.00447	9.00676	8.96098	0.0459052	1009.37	327
1371223_a_at	0001525 // angiogenesis // inferred from mutant phenotype /// 0001542 // ovulation from ovarian follicle // inferred from expression pattern /// 0001666 // response to hypoxia // inferred from expression pattern /// 0006091 // generation of precursor metabolites and energy // non-traceable author statement /// 0007565 // female pregnancy // inferred from expression pattern /// 0007584 // response…	0000139 // Golgi membrane // inferred from electronic annotation /// 0005576 // extracellular region // inferred from electronic annotation /// 0005615 // extracellular space // inferred from direct assay /// 0005768 // endosome // inferred from electronic annotation /// 0005794 // Golgi apparatus // inferred from electronic annotation /// 0005886 // plasma membrane // inferred from direct assay …	0004872 // receptor activity // inferred from electronic annotation /// 0004896 // cytokine receptor activity // inferred from electronic annotation /// 0016500 // protein-hormone receptor activity // inferred from direct assay /// 0016500 // protein-hormone receptor activity // inferred from mutant phenotype /// 0017046 // peptide hormone binding // inferred from direct assay /// 0017046 // pept…	Lepr	leptin receptor	7.37584	6.97878	7.05043	7.14206	7.26423	7.3522	7.50835	7.29554	0.0460213	1011.16	328
1379427_at	---	0016020 // membrane // inferred from electronic annotation /// 0016021 // integral to membrane // inferred from electronic annotation	0004872 // receptor activity // inferred from electronic annotation /// 0005496 // steroid binding // inferred from electronic annotation /// 0008289 // lipid binding // inferred from electronic annotation /// 0020037 // heme binding // inferred from electronic annotation	Pgrmc2	progesterone receptor membrane component 2	8.25435	8.28965	8.27715	8.01426	8.32199	8.35843	8.32965	8.34888	0.0463739	1014.42	329
1370694_at	0006351 // transcription, DNA-dependent // inferred from electronic annotation /// 0006355 // regulation of transcription, DNA-dependent // inferred from electronic annotation /// 0006468 // protein phosphorylation // inferred from electronic annotation /// 0006469 // negative regulation of protein kinase activity // not recorded /// 0006469 // negative regulation of protein kinase activity // in…	0005634 // nucleus // not recorded /// 0005634 // nucleus // inferred from sequence or structural similarity /// 0005634 // nucleus // inferred from electronic annotation /// 0005730 // nucleolus // not recorded	0003714 // transcription corepressor activity // inferred from electronic annotation /// 0003714 // transcription corepressor activity // not recorded /// 0003714 // transcription corepressor activity // inferred from sequence or structural similarity /// 0004672 // protein kinase activity // inferred from electronic annotation /// 0004860 // protein kinase inhibitor activity // inferred from ele…	Trib3	tribbles homolog 3 (Drosophila)	7.22389	6.85974	6.86453	6.86065	7.23646	7.07447	7.24552	6.9631	0.0463636	1015.19	330
1377672_at	0051923 // sulfation // not recorded	0005764 // lysosome // inferred from electronic annotation /// 0015630 // microtubule cytoskeleton // not recorded	0008146 // sulfotransferase activity // inferred from electronic annotation /// 0008146 // sulfotransferase activity // not recorded /// 0016740 // transferase activity // inferred from electronic annotation	Sult1c2 /// Sult1c2a	sulfotransferase family, cytosolic, 1C, member 2 /// sulfotransferase family, cytosolic, 1C, member 2a	9.1393	9.19788	8.89028	9.05445	9.18933	9.24069	9.17606	9.45524	0.0466133	1017.45	331
1388608_x_at	0001701 // in utero embryonic development // not recorded /// 0006810 // transport // inferred from electronic annotation /// 0010942 // positive regulation of cell death // not recorded /// 0015671 // oxygen transport // inferred by curator /// 0015671 // oxygen transport // inferred from electronic annotation /// 0042542 // response to hydrogen peroxide // not recorded /// 0042744 // hydrogen p…	0005625 // soluble fraction // inferred from direct assay /// 0005833 // hemoglobin complex // not recorded /// 0005833 // hemoglobin complex // inferred from direct assay /// 0005833 // hemoglobin complex // inferred from electronic annotation /// 0022627 // cytosolic small ribosomal subunit // not recorded /// 0031838 // haptoglobin-hemoglobin complex // not recorded	0001540 // beta-amyloid binding // inferred from direct assay /// 0004601 // peroxidase activity // not recorded /// 0005344 // oxygen transporter activity // inferred by curator /// 0005344 // oxygen transporter activity // inferred from electronic annotation /// 0005506 // iron ion binding // inferred from electronic annotation /// 0005515 // protein binding // inferred from physical interactio…	Hba-a2 /// LOC360504	hemoglobin alpha, adult chain 2 /// hemoglobin alpha 2 chain	11.4672	11.9335	11.5185	11.3908	11.882	11.783	11.723	11.7375	0.0464729	1017.45	332
1388989_at	0006412 // translation // inferred from electronic annotation	0005622 // intracellular // inferred from electronic annotation /// 0005840 // ribosome // inferred from electronic annotation	0003735 // structural constituent of ribosome // inferred from electronic annotation	LOC688712 /// Rpl22l1 /// Rpl22l2	similar to ribosomal protein L22 like 1 /// ribosomal protein L22 like 1 /// ribosomal protein L22-like 2	10.6897	10.6612	10.8892	10.8852	10.9609	11.0142	10.88	10.968	0.0467177	1020.07	333
1368543_at	0000902 // cell morphogenesis // not recorded /// 0000902 // cell morphogenesis // inferred from sequence or structural similarity /// 0000902 // cell morphogenesis // inferred from electronic annotation /// 0001666 // response to hypoxia // inferred from expression pattern /// 0006801 // superoxide metabolic process // inferred from direct assay /// 0006801 // superoxide metabolic process // inf…	0001725 // stress fiber // inferred from direct assay /// 0005739 // mitochondrion // inferred from direct assay /// 0005783 // endoplasmic reticulum // inferred from electronic annotation /// 0005789 // endoplasmic reticulum membrane // inferred from electronic annotation /// 0005886 // plasma membrane // inferred from electronic annotation /// 0005925 // focal adhesion // inferred from direct a…	0005506 // iron ion binding // inferred from electronic annotation /// 0005515 // protein binding // inferred from physical interaction /// 0009055 // electron carrier activity // inferred from electronic annotation /// 0016174 // NAD(P)H oxidase activity // inferred from direct assay /// 0016175 // superoxide-generating NADPH oxidase activity // not recorded /// 0016175 // superoxide-generating …	Nox4	NADPH oxidase 4	7.97052	7.80105	7.75205	7.86015	8.31337	7.97721	7.94023	7.89098	0.0465988	1020.28	334
1383253_at	---	---	---	---	---	9.70572	9.77212	9.69868	9.78774	9.87077	9.86765	9.78758	10.0522	0.0465522	1021.07	335
1368248_at	0006661 // phosphatidylinositol biosynthetic process // not recorded /// 0006661 // phosphatidylinositol biosynthetic process // inferred from sequence or structural similarity /// 0006661 // phosphatidylinositol biosynthetic process // inferred from electronic annotation /// 0008654 // phospholipid biosynthetic process // inferred from electronic annotation /// 0016024 // CDP-diacylglycerol bios…	0005783 // endoplasmic reticulum // not recorded /// 0005783 // endoplasmic reticulum // inferred from electronic annotation /// 0005789 // endoplasmic reticulum membrane // inferred from direct assay /// 0005789 // endoplasmic reticulum membrane // inferred from electronic annotation /// 0016020 // membrane // inferred from electronic annotation /// 0016021 // integral to membrane // inferred fr…	0004605 // phosphatidate cytidylyltransferase activity // inferred from direct assay /// 0004605 // phosphatidate cytidylyltransferase activity // not recorded /// 0004605 // phosphatidate cytidylyltransferase activity // inferred from electronic annotation /// 0016740 // transferase activity // inferred from electronic annotation /// 0016772 // transferase activity, transferring phosphorus-conta…	Cds1	CDP-diacylglycerol synthase 1	7.78472	7.35211	7.28613	7.43793	7.73062	7.78007	7.78305	7.58605	0.0466458	1022.33	336
1374349_at	0016311 // dephosphorylation // inferred from electronic annotation	---	0016791 // phosphatase activity // inferred from electronic annotation	Ctdspl	CTD (carboxy-terminal domain, RNA polymerase II, polypeptide A) small phosphatase-like	9.03125	8.19522	8.13339	8.04442	8.67655	8.37276	8.66739	8.26707	0.0468546	1024.48	337
1382746_s_at	---	---	---	---	---	7.50981	7.08704	6.89138	6.95111	7.46538	7.30553	7.39328	7.20133	0.0469527	1025.72	338
1371782_at	---	0005739 // mitochondrion // inferred from electronic annotation	---	Nipsnap3b	nipsnap homolog 3B (C. elegans)	10.5411	10.5354	10.5409	10.6323	10.6833	10.6483	10.6887	10.7162	0.0468171	1025.75	339
1373736_at	---	---	---	---	---	6.93476	7.18301	7.13769	7.17183	6.99054	7.30661	7.23605	7.6135	0.0467853	1026.51	340
1368021_at	0001523 // retinoid metabolic process // not recorded /// 0001523 // retinoid metabolic process // inferred from electronic annotation /// 0006068 // ethanol catabolic process // inferred from electronic annotation /// 0006068 // ethanol catabolic process // not recorded /// 0006069 // ethanol oxidation // inferred from direct assay /// 0006069 // ethanol oxidation // not recorded /// 0009790 // …	0005622 // intracellular // not recorded /// 0005622 // intracellular // inferred from electronic annotation /// 0005625 // soluble fraction // inferred from direct assay /// 0005737 // cytoplasm // inferred from electronic annotation /// 0005739 // mitochondrion // inferred from electronic annotation /// 0005739 // mitochondrion // not recorded /// 0005829 // cytosol // inferred from direct assay	0000166 // nucleotide binding // inferred from electronic annotation /// 0004022 // alcohol dehydrogenase (NAD) activity // inferred from direct assay /// 0004022 // alcohol dehydrogenase (NAD) activity // not recorded /// 0004022 // alcohol dehydrogenase (NAD) activity // traceable author statement /// 0004022 // alcohol dehydrogenase (NAD) activity // inferred from electronic annotation /// 000…	Adh1	alcohol dehydrogenase 1 (class I)	12.8375	12.4982	12.3419	12.6298	12.6881	12.7837	12.9692	12.7141	0.0469501	1028.5	341
1377885_at	---	---	---	LOC685203	hypothetical protein LOC685203	7.30708	7.24614	7.29099	7.21441	7.43064	7.53278	7.67898	7.22569	0.0475702	1033.65	342
1372479_at	---	---	---	---	---	8.95543	8.54385	8.56718	8.76236	8.98824	8.94565	8.94501	8.83266	0.0480117	1037.52	343
1386945_a_at	0006633 // fatty acid biosynthetic process // inferred from electronic annotation /// 0006950 // response to stress // traceable author statement /// 0008610 // lipid biosynthetic process // inferred from electronic annotation /// 0050790 // regulation of catalytic activity // inferred from direct assay /// 0051291 // protein heterooligomerization // inferred from direct assay	0005634 // nucleus // inferred from electronic annotation /// 0005634 // nucleus // not recorded /// 0031588 // AMP-activated protein kinase complex // inferred from direct assay /// 0043234 // protein complex // inferred from direct assay	0004679 // AMP-activated protein kinase activity // inferred from direct assay /// 0004679 // AMP-activated protein kinase activity // traceable author statement /// 0019901 // protein kinase binding // inferred from physical interaction	Prkab1	protein kinase, AMP-activated, beta 1 non-catalytic subunit	9.36326	8.97216	9.01291	9.51957	9.6434	9.41604	9.2734	9.40854	0.0485785	1041.58	344
1374531_at	---	---	---	---	---	9.67897	10.3347	9.93078	8.65298	10.3642	9.92415	9.71758	9.66682	0.0489623	1044.92	345
1376649_at	0006468 // protein phosphorylation // inferred from electronic annotation /// 0007243 // intracellular protein kinase cascade // inferred from electronic annotation /// 0008286 // insulin receptor signaling pathway // inferred from electronic annotation /// 0016310 // phosphorylation // inferred from electronic annotation /// 0046777 // protein autophosphorylation // inferred from electronic anno…	0005634 // nucleus // inferred from electronic annotation /// 0005794 // Golgi apparatus // inferred from electronic annotation	0000166 // nucleotide binding // inferred from electronic annotation /// 0000287 // magnesium ion binding // inferred from electronic annotation /// 0004672 // protein kinase activity // inferred from electronic annotation /// 0004674 // protein serine/threonine kinase activity // inferred from electronic annotation /// 0005524 // ATP binding // inferred from electronic annotation /// 0016301 // …	Snf1lk2	SNF1-like kinase 2	7.83911	7.53762	7.41366	7.71973	7.76841	7.81735	7.73108	8.06508	0.0489624	1045.84	346
1370006_at	---	---	---	LOC100912599 /// LOC679739	NADH dehydrogenase [ubiquinone] iron-sulfur protein 6, mitochondrial-like /// NADH dehydrogenase (ubiquinone) Fe-S protein 6	10.2535	10.2531	10.2592	10.311	10.4112	10.3793	10.3594	10.404	0.0488646	1046.11	347
1370027_a_at	0006953 // acute-phase response // inferred from electronic annotation /// 0006954 // inflammatory response // inferred from expression pattern /// 0010466 // negative regulation of peptidase activity // traceable author statement /// 0010466 // negative regulation of peptidase activity // inferred from electronic annotation /// 0010951 // negative regulation of endopeptidase activity // inferred…	0005576 // extracellular region // inferred from electronic annotation /// 0005615 // extracellular space // inferred from electronic annotation	0004866 // endopeptidase inhibitor activity // inferred from electronic annotation /// 0004867 // serine-type endopeptidase inhibitor activity // inferred from electronic annotation /// 0030414 // peptidase inhibitor activity // traceable author statement /// 0030414 // peptidase inhibitor activity // inferred from electronic annotation	A1i3 /// Cpamd8 /// Mug1	alpha-1-inhibitor III /// C3 and PZP-like, alpha-2-macroglobulin domain containing 8 /// murinoglobulin 1	13.77	14.0741	13.9397	13.9235	14.0794	13.9741	14.0815	14.113	0.0488477	1046.94	348
1373808_at	---	---	---	---	---	8.38399	8.39481	8.40581	8.33172	8.52226	8.49472	8.42731	8.56145	0.0492865	1050.57	349
1372690_at	0007166 // cell surface receptor signaling pathway // non-traceable author statement	0005886 // plasma membrane // inferred from electronic annotation /// 0009897 // external side of plasma membrane // inferred from direct assay /// 0009986 // cell surface // inferred from electronic annotation /// 0009986 // cell surface // not recorded /// 0016020 // membrane // inferred from electronic annotation /// 0016021 // integral to membrane // inferred from electronic annotation /// 00…	0004872 // receptor activity // inferred from electronic annotation /// 0004872 // receptor activity // not recorded /// 0004872 // receptor activity // inferred from sequence or structural similarity	Rtn4rl1	reticulon 4 receptor-like 1	7.42173	7.25443	7.10843	7.24535	7.52276	7.44176	7.22172	7.67715	0.0497029	1054.29	350
1387890_at	0006412 // translation // inferred from electronic annotation	0005622 // intracellular // inferred from electronic annotation /// 0005737 // cytoplasm // not recorded /// 0005840 // ribosome // inferred from electronic annotation /// 0015935 // small ribosomal subunit // not recorded /// 0022627 // cytosolic small ribosomal subunit // inferred from direct assay /// 0022627 // cytosolic small ribosomal subunit // not recorded /// 0022627 // cytosolic small r…	0003735 // structural constituent of ribosome // inferred from electronic annotation /// 0003735 // structural constituent of ribosome // not recorded /// 0008270 // zinc ion binding // not recorded /// 0046872 // metal ion binding // inferred from electronic annotation	Rps29	ribosomal protein S29	12.2937	12.3369	12.4116	12.3806	12.4919	12.4596	12.4246	12.4941	0.0496923	1055.01	351
1371244_at	0006166 // purine ribonucleoside salvage // inferred from electronic annotation /// 0006166 // purine ribonucleoside salvage // not recorded /// 0006168 // adenine salvage // inferred from electronic annotation /// 0006168 // adenine salvage // not recorded /// 0007595 // lactation // inferred from direct assay /// 0007625 // grooming behavior // inferred from electronic annotation /// 0007625 //…	0005634 // nucleus // inferred from electronic annotation /// 0005634 // nucleus // not recorded /// 0005730 // nucleolus // not recorded /// 0005737 // cytoplasm // inferred from electronic annotation /// 0005737 // cytoplasm // not recorded	0002055 // adenine binding // inferred from electronic annotation /// 0002055 // adenine binding // not recorded /// 0003999 // adenine phosphoribosyltransferase activity // inferred from electronic annotation /// 0003999 // adenine phosphoribosyltransferase activity // not recorded /// 0016208 // AMP binding // inferred from direct assay /// 0016208 // AMP binding // inferred from electronic ann…	Aprt	adenine phosphoribosyl transferase	9.84659	9.84616	9.78213	9.81038	9.92732	9.98273	9.90989	9.95662	0.0496477	1055.67	352
1396150_at	0016338 // calcium-independent cell-cell adhesion // not recorded /// 0016338 // calcium-independent cell-cell adhesion // inferred from sequence or structural similarity /// 0016338 // calcium-independent cell-cell adhesion // inferred from electronic annotation /// 0045216 // cell-cell junction organization // not recorded	0005886 // plasma membrane // not recorded /// 0005886 // plasma membrane // inferred from electronic annotation /// 0005923 // tight junction // inferred from direct assay /// 0005923 // tight junction // not recorded /// 0005923 // tight junction // inferred from sequence or structural similarity /// 0005923 // tight junction // inferred from electronic annotation /// 0016020 // membrane // inf…	0005198 // structural molecule activity // inferred from electronic annotation /// 0042802 // identical protein binding // not recorded /// 0042802 // identical protein binding // inferred from sequence or structural similarity /// 0042802 // identical protein binding // inferred from electronic annotation	Cldn1	claudin 1	8.16389	8.44291	8.22524	8.09385	8.24388	8.55704	8.27496	8.48013	0.0496006	1056.25	353
Downregulated by a HP diet intake (496 probe sets)
Probe Set ID	Gene Ontology Biological Process	Gene Ontology Cellular Component	Gene Ontology Molecular Function	Gene Symbol	Gene Title	Control_1	Control_2	Control_4	Control_5	HP_1	HP_2	HP_3	HP_4	FDR (Control > HP)	RP stat (Control > HP)	Rank (Control > HP)
1369864_a_at	0006094 // gluconeogenesis // inferred from electronic annotation /// 0006094 // gluconeogenesis // traceable author statement /// 0006520 // cellular amino acid metabolic process // inferred from electronic annotation /// 0006565 // L-serine catabolic process // not recorded /// 0008152 // metabolic process // inferred from electronic annotation /// 0031667 // response to nutrient levels // infe…	0005737 // cytoplasm // inferred from electronic annotation /// 0005737 // cytoplasm // not recorded /// 0005739 // mitochondrion // not recorded	0003824 // catalytic activity // inferred from electronic annotation /// 0003941 // L-serine ammonia-lyase activity // not recorded /// 0003941 // L-serine ammonia-lyase activity // traceable author statement /// 0003941 // L-serine ammonia-lyase activity // inferred from electronic annotation /// 0004794 // L-threonine ammonia-lyase activity // inferred from electronic annotation /// 0016829 // …	Sds	serine dehydratase	10.779	9.18716	9.8165	9.9841	8.81985	8.70169	8.85404	8.96652	0	23.3585	1
1368458_at	0006629 // lipid metabolic process // inferred from electronic annotation /// 0006699 // bile acid biosynthetic process // inferred from direct assay /// 0006699 // bile acid biosynthetic process // inferred from electronic annotation /// 0006699 // bile acid biosynthetic process // not recorded /// 0006699 // bile acid biosynthetic process // traceable author statement /// 0006707 // cholesterol…	0005783 // endoplasmic reticulum // inferred from electronic annotation /// 0005789 // endoplasmic reticulum membrane // inferred from electronic annotation /// 0005792 // microsome // inferred from direct assay /// 0005792 // microsome // traceable author statement /// 0005792 // microsome // inferred from electronic annotation /// 0016020 // membrane // inferred from electronic annotation	0004497 // monooxygenase activity // inferred from electronic annotation /// 0005506 // iron ion binding // inferred from electronic annotation /// 0008123 // cholesterol 7-alpha-monooxygenase activity // inferred from direct assay /// 0008123 // cholesterol 7-alpha-monooxygenase activity // not recorded /// 0008123 // cholesterol 7-alpha-monooxygenase activity // inferred from electronic annotat…	Cyp7a1	cytochrome P450, family 7, subfamily a, polypeptide 1	7.14978	7.95891	9.87938	8.3386	6.58789	6.69287	7.17106	7.99408	0	42.3776	2
1388750_at	0001666 // response to hypoxia // inferred from expression pattern /// 0006508 // proteolysis // inferred from electronic annotation /// 0006879 // cellular iron ion homeostasis // inferred from electronic annotation /// 0006879 // cellular iron ion homeostasis // not recorded /// 0006897 // endocytosis // inferred from electronic annotation /// 0006953 // acute-phase response // inferred from ex…	0005576 // extracellular region // not recorded /// 0005576 // extracellular region // inferred from electronic annotation /// 0005739 // mitochondrion // inferred from direct assay /// 0005768 // endosome // not recorded /// 0005768 // endosome // inferred from electronic annotation /// 0005886 // plasma membrane // inferred from direct assay /// 0005886 // plasma membrane // not recorded /// 00…	0004872 // receptor activity // inferred from electronic annotation /// 0004998 // transferrin receptor activity // inferred from direct assay /// 0004998 // transferrin receptor activity // traceable author statement /// 0008233 // peptidase activity // inferred from electronic annotation /// 0030544 // Hsp70 protein binding // inferred from physical interaction /// 0051087 // chaperone binding …	Tfrc	transferrin receptor	9.34312	10.29	10.5443	10.2132	9.1518	9.58766	8.94755	9.11996	0	52.6179	3
1369790_at	0006094 // gluconeogenesis // traceable author statement /// 0006103 // 2-oxoglutarate metabolic process // inferred from electronic annotation /// 0006103 // 2-oxoglutarate metabolic process // not recorded /// 0006520 // cellular amino acid metabolic process // inferred from direct assay /// 0006520 // cellular amino acid metabolic process // inferred from electronic annotation /// 0006536 // g…	0005739 // mitochondrion // inferred from direct assay /// 0005739 // mitochondrion // not recorded /// 0005739 // mitochondrion // inferred from electronic annotation	0003824 // catalytic activity // inferred from electronic annotation /// 0004838 // L-tyrosine:2-oxoglutarate aminotransferase activity // inferred from direct assay /// 0004838 // L-tyrosine:2-oxoglutarate aminotransferase activity // not recorded /// 0004838 // L-tyrosine:2-oxoglutarate aminotransferase activity // inferred from sequence or structural similarity /// 0004838 // L-tyrosine:2-oxog…	Tat	tyrosine aminotransferase	9.08992	9.25327	9.71787	8.75168	8.37094	8.27067	8.72512	8.18907	0	62.0832	4
1375549_at	---	---	---	---	---	7.26661	8.08085	7.79527	7.73912	6.07513	7.22734	7.35341	6.73392	0	63.2469	5
1381811_at	---	---	---	---	---	7.16355	7.89566	7.80024	7.61902	6.23993	7.09329	7.27202	6.73042	0	81.7417	6
1387703_a_at	0000122 // negative regulation of transcription from RNA polymerase II promoter // not recorded /// 0000122 // negative regulation of transcription from RNA polymerase II promoter // inferred from sequence or structural similarity /// 0000122 // negative regulation of transcription from RNA polymerase II promoter // inferred from electronic annotation /// 0006508 // proteolysis // inferred from e…	0005634 // nucleus // inferred from direct assay /// 0005634 // nucleus // inferred from electronic annotation /// 0005737 // cytoplasm // not recorded /// 0005737 // cytoplasm // inferred from electronic annotation /// 0005813 // centrosome // inferred from direct assay /// 0005938 // cell cortex // inferred from electronic annotation /// 0005938 // cell cortex // not recorded /// 0048471 // per…	0004221 // ubiquitin thiolesterase activity // inferred from electronic annotation /// 0004221 // ubiquitin thiolesterase activity // inferred from mutant phenotype /// 0004221 // ubiquitin thiolesterase activity // not recorded /// 0004221 // ubiquitin thiolesterase activity // inferred from sequence or structural similarity /// 0008233 // peptidase activity // inferred from electronic annotatio…	Usp2	ubiquitin specific peptidase 2	7.38085	8.12976	7.95484	8.03709	6.47442	7.37652	7.58492	7.04498	0.000142857	93.3898	7
1383315_at	---	0005576 // extracellular region // inferred from electronic annotation	---	Tsku	tsukushi small leucine rich proteoglycan homolog (Xenopus laevis)	8.59074	9.39286	9.38508	8.19291	8.05803	8.28907	8.40247	7.52753	0.000125	95.0115	8
1371113_a_at	0001666 // response to hypoxia // inferred from expression pattern /// 0006508 // proteolysis // inferred from electronic annotation /// 0006879 // cellular iron ion homeostasis // inferred from electronic annotation /// 0006879 // cellular iron ion homeostasis // not recorded /// 0006897 // endocytosis // inferred from electronic annotation /// 0006953 // acute-phase response // inferred from ex…	0005576 // extracellular region // not recorded /// 0005576 // extracellular region // inferred from electronic annotation /// 0005739 // mitochondrion // inferred from direct assay /// 0005768 // endosome // not recorded /// 0005768 // endosome // inferred from electronic annotation /// 0005886 // plasma membrane // inferred from direct assay /// 0005886 // plasma membrane // not recorded /// 00…	0004872 // receptor activity // inferred from electronic annotation /// 0004998 // transferrin receptor activity // inferred from direct assay /// 0004998 // transferrin receptor activity // traceable author statement /// 0008233 // peptidase activity // inferred from electronic annotation /// 0030544 // Hsp70 protein binding // inferred from physical interaction /// 0051087 // chaperone binding …	Tfrc	transferrin receptor	7.08248	7.95122	8.14272	7.74727	6.85539	7.30462	6.91247	6.96632	0.000111111	97.1514	9
1374157_at	0006198 // cAMP catabolic process // inferred from direct assay /// 0006198 // cAMP catabolic process // inferred from electronic annotation /// 0006939 // smooth muscle contraction // not recorded /// 0007165 // signal transduction // inferred from electronic annotation /// 0008152 // metabolic process // inferred from electronic annotation	0005625 // soluble fraction // inferred from direct assay /// 0005626 // insoluble fraction // inferred from direct assay /// 0005634 // nucleus // inferred from direct assay /// 0005737 // cytoplasm // inferred from direct assay /// 0005829 // cytosol // inferred from direct assay /// 0048471 // perinuclear region of cytoplasm // inferred from direct assay	0003824 // catalytic activity // inferred from electronic annotation /// 0004114 // 3',5'-cyclic-nucleotide phosphodiesterase activity // inferred from electronic annotation /// 0004115 // 3',5'-cyclic-AMP phosphodiesterase activity // inferred from direct assay /// 0008081 // phosphoric diester hydrolase activity // inferred from electronic annotation /// 0016787 // hydrolase activity // inferre…	Pde4b	Phosphodiesterase 4B, cAMP specific	7.10799	8.13025	8.41638	7.66259	6.95973	6.67884	7.07476	7.65824	0.0001	98.3264	10
1368155_at	0055114 // oxidation-reduction process // inferred from electronic annotation	0005783 // endoplasmic reticulum // inferred from electronic annotation /// 0005789 // endoplasmic reticulum membrane // inferred from electronic annotation /// 0005792 // microsome // inferred from electronic annotation /// 0016020 // membrane // inferred from electronic annotation	0004497 // monooxygenase activity // inferred from electronic annotation /// 0005506 // iron ion binding // inferred from electronic annotation /// 0009055 // electron carrier activity // inferred from electronic annotation /// 0016491 // oxidoreductase activity // inferred from electronic annotation /// 0016705 // oxidoreductase activity, acting on paired donors, with incorporation or reduction …	Cyp2c12	cytochrome P450, family 2, subfamily c, polypeptide 12	10.645	11.3155	11.2096	10.0741	10.1918	10.492	9.51171	10.3153	0.000272727	135.837	11
1369224_at	0006857 // oligopeptide transport // not recorded /// 0006857 // oligopeptide transport // inferred from electronic annotation /// 0007155 // cell adhesion // inferred from electronic annotation /// 0007156 // homophilic cell adhesion // inferred from electronic annotation /// 0007156 // homophilic cell adhesion // not recorded /// 0016339 // calcium-dependent cell-cell adhesion // inferred from …	0005886 // plasma membrane // inferred from electronic annotation /// 0016020 // membrane // inferred from electronic annotation /// 0016021 // integral to membrane // inferred from electronic annotation /// 0016323 // basolateral plasma membrane // inferred from direct assay	0005427 // proton-dependent oligopeptide secondary active transmembrane transporter activity // inferred from electronic annotation /// 0005427 // proton-dependent oligopeptide secondary active transmembrane transporter activity // not recorded /// 0005509 // calcium ion binding // inferred from electronic annotation	Cdh17	cadherin 17	10.0835	10.5025	10.6157	9.95519	9.9801	9.47729	9.46153	9.78986	0.00025	136.447	12
1370150_a_at	0006351 // transcription, DNA-dependent // inferred from electronic annotation /// 0006355 // regulation of transcription, DNA-dependent // inferred from electronic annotation /// 0008610 // lipid biosynthetic process // inferred from electronic annotation /// 0010866 // regulation of triglyceride biosynthetic process // inferred from electronic annotation /// 0010866 // regulation of triglycerid…	0005634 // nucleus // inferred from electronic annotation /// 0005634 // nucleus // not recorded /// 0005730 // nucleolus // not recorded /// 0005829 // cytosol // inferred from electronic annotation /// 0005829 // cytosol // not recorded /// 0005829 // cytosol // inferred from sequence or structural similarity	0042803 // protein homodimerization activity // inferred from electronic annotation /// 0042803 // protein homodimerization activity // not recorded	Thrsp	thyroid hormone responsive	9.68848	10.9125	11.2856	11.4027	9.48506	10.4094	10.2362	10.6868	0.000230769	138.4	13
1379368_at	0000060 // protein import into nucleus, translocation // inferred from electronic annotation /// 0000060 // protein import into nucleus, translocation // not recorded /// 0000122 // negative regulation of transcription from RNA polymerase II promoter // inferred from electronic annotation /// 0000122 // negative regulation of transcription from RNA polymerase II promoter // not recorded /// 00009…	0005622 // intracellular // inferred from electronic annotation /// 0005634 // nucleus // inferred from electronic annotation /// 0005634 // nucleus // not recorded /// 0005657 // replication fork // inferred from electronic annotation /// 0005657 // replication fork // not recorded /// 0005730 // nucleolus // not recorded	0003676 // nucleic acid binding // inferred from electronic annotation /// 0003677 // DNA binding // not recorded /// 0003677 // DNA binding // inferred from electronic annotation /// 0003682 // chromatin binding // not recorded /// 0003682 // chromatin binding // inferred from electronic annotation /// 0003700 // sequence-specific DNA binding transcription factor activity // inferred from electr…	Bcl6	B-cell CLL/lymphoma 6	9.90947	10.4856	10.7774	8.69246	9.04849	8.33977	8.69601	10.9454	0.0005	149.491	14
1371400_at	0006351 // transcription, DNA-dependent // inferred from electronic annotation /// 0006355 // regulation of transcription, DNA-dependent // inferred from electronic annotation /// 0008610 // lipid biosynthetic process // inferred from electronic annotation /// 0010866 // regulation of triglyceride biosynthetic process // inferred from electronic annotation /// 0010866 // regulation of triglycerid…	0005634 // nucleus // inferred from electronic annotation /// 0005634 // nucleus // not recorded /// 0005730 // nucleolus // not recorded /// 0005829 // cytosol // inferred from electronic annotation /// 0005829 // cytosol // not recorded /// 0005829 // cytosol // inferred from sequence or structural similarity	0042803 // protein homodimerization activity // inferred from electronic annotation /// 0042803 // protein homodimerization activity // not recorded	Thrsp	thyroid hormone responsive	10.1681	11.2371	11.5369	11.757	9.9159	10.7363	10.5713	11.0188	0.000666667	157.155	15
1373866_at	---	0005739 // mitochondrion // not recorded /// 0005739 // mitochondrion // inferred from electronic annotation /// 0005743 // mitochondrial inner membrane // inferred from electronic annotation /// 0016020 // membrane // inferred from electronic annotation	---	Coq10b	coenzyme Q10 homolog B (S. cerevisiae)	9.31423	9.00564	9.00463	9.38459	8.63801	8.77682	8.7882	8.29434	0.000875	160.357	16
1393947_at	0006810 // transport // inferred from electronic annotation	0005739 // mitochondrion // not recorded /// 0005739 // mitochondrion // inferred from electronic annotation /// 0005743 // mitochondrial inner membrane // inferred from electronic annotation /// 0005743 // mitochondrial inner membrane // not recorded /// 0016020 // membrane // inferred from electronic annotation /// 0016021 // integral to membrane // inferred from electronic annotation	---	Slc25a15	Solute carrier family 25 (mitochondrial carrier; ornithine transporter) member 15	11.1988	11.1463	11.1904	11.4411	10.5589	10.8046	10.8509	10.6368	0.000882353	162.251	17
1387852_at	0006351 // transcription, DNA-dependent // inferred from electronic annotation /// 0006355 // regulation of transcription, DNA-dependent // inferred from electronic annotation /// 0008610 // lipid biosynthetic process // inferred from electronic annotation /// 0010866 // regulation of triglyceride biosynthetic process // inferred from electronic annotation /// 0010866 // regulation of triglycerid…	0005634 // nucleus // inferred from electronic annotation /// 0005634 // nucleus // not recorded /// 0005730 // nucleolus // not recorded /// 0005829 // cytosol // inferred from electronic annotation /// 0005829 // cytosol // not recorded /// 0005829 // cytosol // inferred from sequence or structural similarity	0042803 // protein homodimerization activity // inferred from electronic annotation /// 0042803 // protein homodimerization activity // not recorded	Thrsp	thyroid hormone responsive	8.45446	9.60012	9.95221	10.1369	8.32978	9.11006	8.97606	9.34684	0.000833333	164.477	18
1397647_at	0006810 // transport // inferred from electronic annotation	0005739 // mitochondrion // not recorded /// 0005739 // mitochondrion // inferred from electronic annotation /// 0005743 // mitochondrial inner membrane // inferred from electronic annotation /// 0005743 // mitochondrial inner membrane // not recorded /// 0016020 // membrane // inferred from electronic annotation /// 0016021 // integral to membrane // inferred from electronic annotation	---	Slc25a15	solute carrier family 25 (mitochondrial carrier; ornithine transporter) member 15	8.8958	8.90279	8.9728	9.14783	8.31665	8.54596	8.58119	8.39727	0.000894737	169.12	19
1397573_at	---	---	---	LOC100912383	uncharacterized LOC100912383	8.78115	8.85875	8.65195	8.87201	8.68966	7.83301	8.07934	8.40192	0.0013	188.642	20
1384388_at	0006810 // transport // inferred from electronic annotation /// 0007030 // Golgi organization // inferred from electronic annotation /// 0007030 // Golgi organization // not recorded /// 0010638 // positive regulation of organelle organization // inferred from electronic annotation /// 0010638 // positive regulation of organelle organization // not recorded /// 0015031 // protein transport // inf…	0005783 // endoplasmic reticulum // not recorded /// 0005783 // endoplasmic reticulum // inferred from electronic annotation /// 0005789 // endoplasmic reticulum membrane // inferred from electronic annotation /// 0005793 // endoplasmic reticulum-Golgi intermediate compartment // not recorded /// 0005793 // endoplasmic reticulum-Golgi intermediate compartment // inferred from electronic annotatio…	0005515 // protein binding // inferred from physical interaction	Tmed9	transmembrane emp24 protein transport domain containing 9	9.25571	9.30939	9.04741	9.16731	9.00478	8.61197	8.69439	8.48581	0.00157143	197.181	21
1367814_at	0001666 // response to hypoxia // inferred from direct assay /// 0006754 // ATP biosynthetic process // inferred from electronic annotation /// 0006810 // transport // inferred from electronic annotation /// 0006811 // ion transport // inferred from electronic annotation /// 0006813 // potassium ion transport // inferred from direct assay /// 0006813 // potassium ion transport // inferred from el…	0005886 // plasma membrane // not recorded /// 0005886 // plasma membrane // inferred from electronic annotation /// 0005890 // sodium:potassium-exchanging ATPase complex // inferred from direct assay /// 0005901 // caveola // inferred from direct assay /// 0016020 // membrane // inferred from electronic annotation /// 0016021 // integral to membrane // inferred from electronic annotation /// 001…	0005391 // sodium:potassium-exchanging ATPase activity // inferred by curator /// 0005391 // sodium:potassium-exchanging ATPase activity // inferred from direct assay /// 0005391 // sodium:potassium-exchanging ATPase activity // inferred from electronic annotation	Atp1b1	ATPase, Na+/K+ transporting, beta 1 polypeptide	8.63888	8.67311	8.84641	8.79709	8.15876	8.33771	8.36391	8.18972	0.00172727	204.09	22
1372616_at	---	---	---	---	---	6.11247	7.52054	7.61294	7.38693	6.15614	6.69405	6.76289	6.86872	0.00178261	214.05	23
1394207_at	---	---	---	---	---	7.51483	7.60745	7.58035	8.35043	7.31384	7.17412	7.36896	7.17292	0.001875	217.823	24
1368213_at	0003420 // regulation of growth plate cartilage chondrocyte proliferation // inferred from mutant phenotype /// 0007584 // response to nutrient // inferred from expression pattern /// 0009437 // carnitine metabolic process // inferred from expression pattern /// 0009812 // flavonoid metabolic process // inferred from expression pattern /// 0018393 // internal peptidyl-lysine acetylation // inferr…	0005624 // membrane fraction // inferred from direct assay /// 0005625 // soluble fraction // inferred from electronic annotation /// 0005739 // mitochondrion // inferred from direct assay /// 0005783 // endoplasmic reticulum // inferred from electronic annotation /// 0005789 // endoplasmic reticulum membrane // inferred from electronic annotation /// 0005792 // microsome // inferred from direct …	0003958 // NADPH-hemoprotein reductase activity // inferred from direct assay /// 0003958 // NADPH-hemoprotein reductase activity // inferred from mutant phenotype /// 0003958 // NADPH-hemoprotein reductase activity // not recorded /// 0003958 // NADPH-hemoprotein reductase activity // inferred from electronic annotation /// 0004128 // cytochrome-b5 reductase activity // inferred from direct assa…	Por	P450 (cytochrome) oxidoreductase	7.28851	7.27325	7.3051	7.64161	6.76759	6.92547	7.12679	6.76729	0.00184	218.525	25
1385110_at	---	---	---	---	---	8.67338	8.61548	7.8846	8.12792	8.07776	7.65468	7.96112	7.36846	0.00184615	219.501	26
1382278_at	---	---	---	---	---	8.14888	7.56787	7.44112	8.19731	7.53964	7.15333	7.38008	7.20168	0.00196296	226.443	27
1377869_at	0048511 // rhythmic process // inferred from electronic annotation	---	---	Ccrn4l	CCR4 carbon catabolite repression 4-like (S. cerevisiae)	6.65859	7.53879	7.69285	6.12699	6.32024	6.58841	6.20787	6.3791	0.00196429	228.008	28
1392613_at	---	---	---	---	---	8.35889	8.13772	8.40469	7.92735	7.71351	6.63778	8.32251	7.84855	0.00193103	229.828	29
1386937_at	0001666 // response to hypoxia // inferred from direct assay /// 0006754 // ATP biosynthetic process // inferred from electronic annotation /// 0006810 // transport // inferred from electronic annotation /// 0006811 // ion transport // inferred from electronic annotation /// 0006813 // potassium ion transport // inferred from direct assay /// 0006813 // potassium ion transport // inferred from el…	0005886 // plasma membrane // not recorded /// 0005886 // plasma membrane // inferred from electronic annotation /// 0005890 // sodium:potassium-exchanging ATPase complex // inferred from direct assay /// 0005901 // caveola // inferred from direct assay /// 0016020 // membrane // inferred from electronic annotation /// 0016021 // integral to membrane // inferred from electronic annotation /// 001…	0005391 // sodium:potassium-exchanging ATPase activity // inferred by curator /// 0005391 // sodium:potassium-exchanging ATPase activity // inferred from direct assay /// 0005391 // sodium:potassium-exchanging ATPase activity // inferred from electronic annotation	Atp1b1	ATPase, Na+/K+ transporting, beta 1 polypeptide	9.01979	9.22276	9.25375	9.06787	8.56141	8.74207	8.82647	8.64814	0.00206667	233.957	30
1388792_at	0000186 // activation of MAPKK activity // inferred from electronic annotation /// 0000186 // activation of MAPKK activity // not recorded /// 0006469 // negative regulation of protein kinase activity // inferred from electronic annotation /// 0006469 // negative regulation of protein kinase activity // not recorded /// 0006915 // apoptotic process // inferred from electronic annotation /// 00069…	0005634 // nucleus // inferred from electronic annotation	---	Gadd45g	growth arrest and DNA-damage-inducible, gamma	8.51052	8.58101	7.47344	8.61485	8.28247	7.21872	7.97867	7.6548	0.002	234.401	31
1387109_at	0003420 // regulation of growth plate cartilage chondrocyte proliferation // inferred from mutant phenotype /// 0007584 // response to nutrient // inferred from expression pattern /// 0009437 // carnitine metabolic process // inferred from expression pattern /// 0009812 // flavonoid metabolic process // inferred from expression pattern /// 0018393 // internal peptidyl-lysine acetylation // inferr…	0005624 // membrane fraction // inferred from direct assay /// 0005625 // soluble fraction // inferred from electronic annotation /// 0005739 // mitochondrion // inferred from direct assay /// 0005783 // endoplasmic reticulum // inferred from electronic annotation /// 0005789 // endoplasmic reticulum membrane // inferred from electronic annotation /// 0005792 // microsome // inferred from direct …	0003958 // NADPH-hemoprotein reductase activity // inferred from direct assay /// 0003958 // NADPH-hemoprotein reductase activity // inferred from mutant phenotype /// 0003958 // NADPH-hemoprotein reductase activity // not recorded /// 0003958 // NADPH-hemoprotein reductase activity // inferred from electronic annotation /// 0004128 // cytochrome-b5 reductase activity // inferred from direct assa…	Por	P450 (cytochrome) oxidoreductase	8.9622	9.02509	9.15442	9.79574	8.39775	8.84466	9.01916	8.54875	0.002125	236.445	32
1394330_at	---	---	---	---	---	9.21124	8.68813	8.76634	9.28105	9.09609	8.02972	8.44771	8.36644	0.00218182	240.668	33
1368303_at	0000122 // negative regulation of transcription from RNA polymerase II promoter // inferred from direct assay /// 0000122 // negative regulation of transcription from RNA polymerase II promoter // not recorded /// 0000122 // negative regulation of transcription from RNA polymerase II promoter // inferred from electronic annotation /// 0006351 // transcription, DNA-dependent // inferred from elect…	0005634 // nucleus // inferred from direct assay /// 0005634 // nucleus // not recorded /// 0005634 // nucleus // inferred from electronic annotation /// 0005737 // cytoplasm // inferred from electronic annotation /// 0005737 // cytoplasm // not recorded	0000988 // protein binding transcription factor activity // inferred from direct assay /// 0004871 // signal transducer activity // inferred from electronic annotation /// 0005515 // protein binding // inferred from physical interaction	Per2	period homolog 2 (Drosophila)	6.91091	7.17909	7.51304	8.14074	6.63103	6.81102	6.82583	7.43693	0.00229412	242.837	34
1384389_at	---	---	---	---	---	7.83053	7.80502	8.34382	7.863	7.53702	7.63623	7.54721	7.36644	0.00231429	245.021	35
1380306_at	---	---	---	---	---	9.63023	9.4204	9.56661	9.21393	8.97576	7.61722	9.59714	9.12355	0.00225	245.065	36
1372318_at	---	---	---	---	---	6.72888	6.83213	7.6046	7.45661	6.52185	6.47664	6.96046	6.58444	0.00251351	254.47	37
1370670_at	0006351 // transcription, DNA-dependent // inferred from electronic annotation /// 0006355 // regulation of transcription, DNA-dependent // inferred from electronic annotation /// 0008283 // cell proliferation // inferred from expression pattern /// 0030154 // cell differentiation // inferred from expression pattern	0005622 // intracellular // inferred from electronic annotation /// 0005634 // nucleus // inferred from electronic annotation	0003676 // nucleic acid binding // inferred from electronic annotation /// 0003677 // DNA binding // inferred from electronic annotation /// 0008270 // zinc ion binding // inferred from electronic annotation /// 0046872 // metal ion binding // inferred from electronic annotation	Zfp37	zinc finger protein 37	8.22136	8.3807	7.4847	8.47646	8.01831	7.631	7.84046	6.99861	0.00252632	256.122	38
1387270_at	0000122 // negative regulation of transcription from RNA polymerase II promoter // inferred from direct assay /// 0000122 // negative regulation of transcription from RNA polymerase II promoter // not recorded /// 0000122 // negative regulation of transcription from RNA polymerase II promoter // inferred from electronic annotation /// 0001570 // vasculogenesis // inferred from electronic annotati…	0005634 // nucleus // inferred from direct assay /// 0005634 // nucleus // not recorded /// 0005634 // nucleus // traceable author statement /// 0005634 // nucleus // inferred from electronic annotation /// 0005737 // cytoplasm // inferred from electronic annotation /// 0005737 // cytoplasm // not recorded /// 0032993 // protein-DNA complex // inferred from electronic annotation /// 0032993 // pr…	0003677 // DNA binding // inferred from electronic annotation /// 0003682 // chromatin binding // inferred from electronic annotation /// 0003682 // chromatin binding // not recorded /// 0003700 // sequence-specific DNA binding transcription factor activity // inferred from electronic annotation /// 0003700 // sequence-specific DNA binding transcription factor activity // not recorded /// 0008134…	Hhex	hematopoietically expressed homeobox	11.9771	9.39685	8.30812	11.4456	11.1263	10.8991	10.1258	8.00766	0.00246154	256.595	39
1368272_at	0006103 // 2-oxoglutarate metabolic process // inferred from sequence or structural similarity /// 0006107 // oxaloacetate metabolic process // inferred from electronic annotation /// 0006107 // oxaloacetate metabolic process // not recorded /// 0006114 // glycerol biosynthetic process // inferred from electronic annotation /// 0006114 // glycerol biosynthetic process // not recorded /// 0006520 …	0005625 // soluble fraction // inferred from direct assay /// 0005737 // cytoplasm // inferred from direct assay /// 0005737 // cytoplasm // not recorded /// 0005737 // cytoplasm // inferred from electronic annotation /// 0005764 // lysosome // inferred from direct assay /// 0005829 // cytosol // not recorded /// 0005829 // cytosol // traceable author statement /// 0005829 // cytosol // inferred …	0003824 // catalytic activity // inferred from electronic annotation /// 0004069 // L-aspartate:2-oxoglutarate aminotransferase activity // inferred from direct assay /// 0004069 // L-aspartate:2-oxoglutarate aminotransferase activity // inferred from mutant phenotype /// 0004069 // L-aspartate:2-oxoglutarate aminotransferase activity // not recorded /// 0004069 // L-aspartate:2-oxoglutarate amin…	Got1	glutamic-oxaloacetic transaminase 1, soluble (aspartate aminotransferase 1)	11.1974	10.2791	10.5494	10.8853	10.0556	10.3135	10.4962	9.97812	0.002575	260.88	40
1378586_at	0007205 // protein kinase C-activating G-protein coupled receptor signaling pathway // inferred from electronic annotation /// 0007205 // protein kinase C-activating G-protein coupled receptor signaling pathway // not recorded /// 0009968 // negative regulation of signal transduction // inferred from electronic annotation /// 0016567 // protein ubiquitination // inferred from electronic annotatio…	0005622 // intracellular // inferred from electronic annotation /// 0005886 // plasma membrane // inferred from electronic annotation /// 0005886 // plasma membrane // not recorded	---	Cish	cytokine inducible SH2-containing protein	8.76224	6.33887	6.04274	8.76853	7.56766	6.68649	8.16304	5.9108	0.00263415	262.693	41
1378136_at	0006897 // endocytosis // inferred from electronic annotation	0005905 // coated pit // inferred from electronic annotation /// 0016020 // membrane // inferred from electronic annotation /// 0016021 // integral to membrane // inferred from electronic annotation	0004872 // receptor activity // inferred from electronic annotation	Lrp3	low density lipoprotein receptor-related protein 3	7.59597	7.89324	7.80903	7.71297	7.4113	7.34129	7.25665	7.32879	0.00257143	262.912	42
1397751_at	---	---	---	---	---	7.50019	7.91486	7.56954	7.73006	6.97315	7.54641	7.32343	6.94884	0.00262791	265.694	43
1375856_at	---	---	---	---	---	8.68687	9.03214	9.0256	8.75365	8.54338	8.31761	8.41959	8.54783	0.00268182	267.456	44
1370387_at	0007608 // sensory perception of smell // inferred from electronic annotation /// 0009822 // alkaloid catabolic process // not recorded /// 0010628 // positive regulation of gene expression // inferred from electronic annotation /// 0042737 // drug catabolic process // not recorded /// 0050896 // response to stimulus // inferred from electronic annotation /// 0055114 // oxidation-reduction proces…	0005783 // endoplasmic reticulum // inferred from electronic annotation /// 0005789 // endoplasmic reticulum membrane // inferred from electronic annotation /// 0005792 // microsome // inferred from electronic annotation /// 0016020 // membrane // inferred from electronic annotation	0004497 // monooxygenase activity // inferred from sequence or structural similarity /// 0004497 // monooxygenase activity // inferred from electronic annotation /// 0005506 // iron ion binding // inferred from electronic annotation /// 0008395 // steroid hydroxylase activity // traceable author statement /// 0009055 // electron carrier activity // inferred from electronic annotation /// 0016491 …	Cyp3a9	cytochrome P450, family 3, subfamily a, polypeptide 9	10.1137	10.2393	10.3363	9.51547	9.72433	9.10214	9.60238	9.83163	0.00304444	276.478	45
1383587_at	0007249 // I-kappaB kinase/NF-kappaB cascade // not recorded /// 0007249 // I-kappaB kinase/NF-kappaB cascade // inferred from electronic annotation /// 0007254 // JNK cascade // not recorded /// 0007254 // JNK cascade // inferred from electronic annotation /// 0007266 // Rho protein signal transduction // not recorded /// 0007266 // Rho protein signal transduction // inferred from electronic ann…	---	---	RGD1565496	similar to Butyrate-induced transcript 1	8.30549	8.43573	8.57866	8.61457	8.16168	8.0364	8.06521	8.04125	0.00308696	278.891	46
1397225_at	---	---	---	---	---	8.45951	8.30196	8.44512	8.10812	7.94023	6.97006	8.38321	7.91695	0.00310638	280.329	47
1393739_at	---	---	---	---	---	7.41749	7.68689	7.76653	7.92417	7.81371	6.53453	7.09668	7.3347	0.00316667	287.612	48
1385620_at	0006950 // response to stress // inferred from electronic annotation /// 0051085 // chaperone mediated protein folding requiring cofactor // inferred from electronic annotation /// 0051085 // chaperone mediated protein folding requiring cofactor // not recorded	0005634 // nucleus // inferred from electronic annotation /// 0005634 // nucleus // not recorded /// 0005730 // nucleolus // not recorded /// 0005737 // cytoplasm // inferred from electronic annotation /// 0005737 // cytoplasm // not recorded /// 0005874 // microtubule // inferred from electronic annotation /// 0005874 // microtubule // not recorded	0000166 // nucleotide binding // inferred from electronic annotation /// 0005524 // ATP binding // inferred from electronic annotation /// 0043014 // alpha-tubulin binding // inferred from electronic annotation /// 0043014 // alpha-tubulin binding // not recorded	Hsph1	heat shock 105/110 protein 1	8.48547	8.55393	8.71435	8.66217	8.13261	8.20438	8.42929	7.99308	0.00328571	292.848	49
1392946_at	---	---	---	---	---	10.2013	9.9056	9.84297	9.99145	9.44691	9.46242	9.7451	9.64763	0.00326	293.71	50
1375852_at	0006694 // steroid biosynthetic process // inferred from electronic annotation /// 0006695 // cholesterol biosynthetic process // inferred from direct assay /// 0006695 // cholesterol biosynthetic process // not recorded /// 0006695 // cholesterol biosynthetic process // inferred from electronic annotation /// 0006743 // ubiquinone metabolic process // inferred from mutant phenotype /// 0007568 /…	0005783 // endoplasmic reticulum // inferred from electronic annotation /// 0005789 // endoplasmic reticulum membrane // inferred from electronic annotation /// 0005792 // microsome // inferred from direct assay /// 0005792 // microsome // inferred from electronic annotation /// 0016020 // membrane // inferred from electronic annotation /// 0016021 // integral to membrane // inferred from electro…	0004420 // hydroxymethylglutaryl-CoA reductase (NADPH) activity // inferred from electronic annotation /// 0004420 // hydroxymethylglutaryl-CoA reductase (NADPH) activity // not recorded /// 0016491 // oxidoreductase activity // inferred from electronic annotation /// 0016616 // oxidoreductase activity, acting on the CH-OH group of donors, NAD or NADP as acceptor // inferred from electronic annot…	Hmgcr	3-hydroxy-3-methylglutaryl-CoA reductase	9.54048	9.47518	9.61237	9.75365	9.28224	9.33656	9.18043	8.97937	0.00352941	301.181	51
1383149_at	---	---	---	LOC684122	similar to development and differentiation enhancing factor-like 1	7.59726	7.97728	8.18328	8.29602	7.41421	7.60092	7.79864	7.35137	0.0035	301.533	52
1394401_at	0006633 // fatty acid biosynthetic process // inferred from electronic annotation /// 0008610 // lipid biosynthetic process // inferred from electronic annotation /// 0019367 // fatty acid elongation, saturated fatty acid // inferred from direct assay /// 0019367 // fatty acid elongation, saturated fatty acid // not recorded /// 0019367 // fatty acid elongation, saturated fatty acid // inferred f…	0005783 // endoplasmic reticulum // not recorded /// 0005783 // endoplasmic reticulum // inferred from sequence or structural similarity /// 0005783 // endoplasmic reticulum // inferred from electronic annotation /// 0005789 // endoplasmic reticulum membrane // inferred from electronic annotation /// 0016020 // membrane // inferred from electronic annotation /// 0016021 // integral to membrane //…	0009922 // fatty acid elongase activity // inferred from direct assay /// 0016740 // transferase activity // inferred from electronic annotation /// 0016747 // transferase activity, transferring acyl groups other than amino-acyl groups // not recorded /// 0016747 // transferase activity, transferring acyl groups other than amino-acyl groups // inferred from electronic annotation	Elovl6	ELOVL fatty acid elongase 6	5.94127	6.42735	7.32912	7.13197	5.72179	6.05019	6.76432	6.17502	0.00343396	301.922	53
1387665_at	0006479 // protein methylation // inferred from direct assay /// 0006579 // betaine catabolic process // inferred from electronic annotation /// 0009086 // methionine biosynthetic process // inferred from direct assay /// 0009086 // methionine biosynthetic process // not recorded /// 0009086 // methionine biosynthetic process // inferred from electronic annotation /// 0032259 // methylation // no…	0005737 // cytoplasm // inferred from electronic annotation /// 0005737 // cytoplasm // not recorded /// 0043234 // protein complex // inferred from direct assay	0008168 // methyltransferase activity // inferred from direct assay /// 0008168 // methyltransferase activity // inferred from electronic annotation /// 0008270 // zinc ion binding // inferred from electronic annotation /// 0008898 // homocysteine S-methyltransferase activity // inferred from electronic annotation /// 0008898 // homocysteine S-methyltransferase activity // not recorded /// 001674…	Bhmt /// LOC100363143	betaine-homocysteine S-methyltransferase /// betaine--homocysteine S-methyltransferase 1-like	12.2494	12.6635	12.6988	12.2374	11.8091	12.0815	12.1863	12.164	0.00337037	301.964	54
1372920_at	0006537 // glutamate biosynthetic process // inferred from electronic annotation /// 0006562 // proline catabolic process // inferred from electronic annotation /// 0055114 // oxidation-reduction process // inferred from electronic annotation	0005739 // mitochondrion // inferred from direct assay /// 0005739 // mitochondrion // not recorded /// 0005739 // mitochondrion // inferred from electronic annotation /// 0005743 // mitochondrial inner membrane // inferred from electronic annotation /// 0005743 // mitochondrial inner membrane // not recorded	0004657 // proline dehydrogenase activity // inferred from mutant phenotype /// 0004657 // proline dehydrogenase activity // not recorded /// 0004657 // proline dehydrogenase activity // inferred from electronic annotation /// 0016597 // amino acid binding // inferred from mutant phenotype /// 0071949 // FAD binding // inferred from electronic annotation /// 0071949 // FAD binding // not recorded	Prodh	proline dehydrogenase (oxidase) 1	9.05504	9.47002	9.39473	9.08475	9.04055	8.80006	8.79943	8.78193	0.00370909	308.194	55
1368877_at	0000122 // negative regulation of transcription from RNA polymerase II promoter // inferred from mutant phenotype /// 0001666 // response to hypoxia // inferred from expression pattern /// 0001822 // kidney development // inferred from expression pattern /// 0006351 // transcription, DNA-dependent // inferred from electronic annotation /// 0006355 // regulation of transcription, DNA-dependent // …	0005622 // intracellular // inferred from electronic annotation /// 0005634 // nucleus // inferred from direct assay /// 0005634 // nucleus // inferred from electronic annotation /// 0005730 // nucleolus // inferred from direct assay	0003676 // nucleic acid binding // inferred from electronic annotation /// 0003677 // DNA binding // inferred from electronic annotation /// 0003700 // sequence-specific DNA binding transcription factor activity // inferred from mutant phenotype /// 0008270 // zinc ion binding // inferred from electronic annotation /// 0046872 // metal ion binding // inferred from electronic annotation	Zfp354a	zinc finger protein 354A	10.1124	11.7236	10.9781	9.36796	8.94656	11.5767	10.3742	9.83712	0.00417857	319.479	56
1398759_at	0006351 // transcription, DNA-dependent // inferred from electronic annotation /// 0006355 // regulation of transcription, DNA-dependent // inferred from electronic annotation /// 0008284 // positive regulation of cell proliferation // inferred from electronic annotation /// 0043065 // positive regulation of apoptotic process // inferred from electronic annotation /// 0043066 // negative regulati…	0005634 // nucleus // inferred from electronic annotation /// 0005737 // cytoplasm // inferred from electronic annotation	0003700 // sequence-specific DNA binding transcription factor activity // inferred from electronic annotation	Tsc22d1	TSC22 domain family, member 1	10.6345	11.6242	11.8986	11.0122	10.4886	10.3942	10.6581	11.6934	0.00447368	326.304	57
1393342_at	---	---	---	---	---	11.5851	11.537	11.5714	11.785	11.1073	11.3216	11.3422	11.1586	0.00462069	330.111	58
1386344_at	---	---	---	---	---	10.6825	10.1321	10.6456	10.6114	10.1222	9.98014	10.3605	9.97248	0.00474576	333.696	59
1393881_at	0006474 // N-terminal protein amino acid acetylation // inferred from electronic annotation /// 0006474 // N-terminal protein amino acid acetylation // not recorded /// 0008152 // metabolic process // not recorded /// 0045893 // positive regulation of transcription, DNA-dependent // inferred from electronic annotation /// 0045893 // positive regulation of transcription, DNA-dependent // not recor…	0005634 // nucleus // not recorded /// 0005634 // nucleus // inferred from electronic annotation /// 0005667 // transcription factor complex // inferred from electronic annotation /// 0005667 // transcription factor complex // not recorded /// 0005737 // cytoplasm // inferred from electronic annotation /// 0005737 // cytoplasm // not recorded	0008080 // N-acetyltransferase activity // inferred from electronic annotation /// 0008080 // N-acetyltransferase activity // not recorded /// 0016407 // acetyltransferase activity // not recorded /// 0016407 // acetyltransferase activity // inferred from electronic annotation /// 0043022 // ribosome binding // inferred from electronic annotation /// 0043022 // ribosome binding // not recorded	Naa15	N(alpha)-acetyltransferase 15, NatA auxiliary subunit	8.7481	8.72234	9.09329	8.94704	8.64262	8.44663	8.43524	8.50791	0.00473333	334.852	60
1388898_at	0006950 // response to stress // inferred from electronic annotation /// 0051085 // chaperone mediated protein folding requiring cofactor // inferred from electronic annotation /// 0051085 // chaperone mediated protein folding requiring cofactor // not recorded	0005634 // nucleus // inferred from electronic annotation /// 0005634 // nucleus // not recorded /// 0005730 // nucleolus // not recorded /// 0005737 // cytoplasm // inferred from electronic annotation /// 0005737 // cytoplasm // not recorded /// 0005874 // microtubule // inferred from electronic annotation /// 0005874 // microtubule // not recorded	0000166 // nucleotide binding // inferred from electronic annotation /// 0005524 // ATP binding // inferred from electronic annotation /// 0043014 // alpha-tubulin binding // inferred from electronic annotation /// 0043014 // alpha-tubulin binding // not recorded	Hsph1	heat shock 105/110 protein 1	10.162	10.255	10.4754	10.3716	9.70502	9.8877	10.2514	9.7503	0.00490164	340.037	61
1381499_at	---	---	---	---	---	6.95435	7.41236	7.2182	6.33478	6.66335	6.42764	6.40874	6.5608	0.00556452	350.979	62
1387874_at	0001889 // liver development // inferred from expression pattern /// 0006351 // transcription, DNA-dependent // inferred from electronic annotation /// 0006355 // regulation of transcription, DNA-dependent // inferred from electronic annotation /// 0045944 // positive regulation of transcription from RNA polymerase II promoter // inferred from direct assay /// 0045944 // positive regulation of tr…	0005634 // nucleus // inferred from direct assay /// 0005634 // nucleus // inferred from electronic annotation	0000977 // RNA polymerase II regulatory region sequence-specific DNA binding // inferred from electronic annotation /// 0000977 // RNA polymerase II regulatory region sequence-specific DNA binding // not recorded /// 0001077 // RNA polymerase II core promoter proximal region sequence-specific DNA binding transcription factor activity involved in positive regulation of transcription // inferred fr…	Dbp	D site of albumin promoter (albumin D-box) binding protein	6.78485	6.5875	7.36551	8.43058	6.28375	6.38417	7.10271	7.95298	0.00612698	361.382	63
1374251_at	---	---	---	---	---	7.67872	7.42748	7.95381	6.94818	6.88959	6.74527	7.49978	7.14084	0.00614063	363.589	64
1367894_at	0006629 // lipid metabolic process // inferred from electronic annotation /// 0006641 // triglyceride metabolic process // not recorded /// 0006695 // cholesterol biosynthetic process // not recorded /// 0006991 // response to sterol depletion // not recorded /// 0008202 // steroid metabolic process // inferred from electronic annotation /// 0008203 // cholesterol metabolic process // inferred fr…	0005783 // endoplasmic reticulum // not recorded /// 0005783 // endoplasmic reticulum // inferred from electronic annotation /// 0005789 // endoplasmic reticulum membrane // inferred from electronic annotation /// 0016020 // membrane // inferred from electronic annotation /// 0016021 // integral to membrane // inferred from electronic annotation	---	Insig1	insulin induced gene 1	11.0795	11.8172	11.4159	10.8385	10.6331	11.0291	11.4743	10.008	0.00684615	375.353	65
1368115_at	0001666 // response to hypoxia // not recorded /// 0016338 // calcium-independent cell-cell adhesion // not recorded /// 0016338 // calcium-independent cell-cell adhesion // inferred from sequence or structural similarity	0005886 // plasma membrane // inferred from electronic annotation /// 0005923 // tight junction // inferred from direct assay /// 0005923 // tight junction // not recorded /// 0005923 // tight junction // inferred from sequence or structural similarity /// 0005923 // tight junction // inferred from electronic annotation /// 0016020 // membrane // inferred from electronic annotation /// 0016021 //…	0005198 // structural molecule activity // inferred from electronic annotation /// 0042802 // identical protein binding // not recorded /// 0042802 // identical protein binding // inferred from sequence or structural similarity	Cldn3	claudin 3	9.19663	9.79523	9.9218	9.59844	9.10256	9.39308	9.3715	9.02192	0.0069697	377.801	66
1369249_at	0006810 // transport // inferred from electronic annotation /// 0006817 // phosphate ion transport // traceable author statement /// 0006817 // phosphate ion transport // inferred from electronic annotation /// 0030500 // regulation of bone mineralization // not recorded /// 0030500 // regulation of bone mineralization // inferred from sequence or structural similarity /// 0030500 // regulation o…	0005886 // plasma membrane // not recorded /// 0005886 // plasma membrane // inferred from sequence or structural similarity /// 0005886 // plasma membrane // inferred from electronic annotation /// 0005887 // integral to plasma membrane // not recorded /// 0005887 // integral to plasma membrane // inferred from sequence or structural similarity /// 0005887 // integral to plasma membrane // infer…	0005315 // inorganic phosphate transmembrane transporter activity // not recorded /// 0005315 // inorganic phosphate transmembrane transporter activity // traceable author statement /// 0005315 // inorganic phosphate transmembrane transporter activity // inferred from electronic annotation /// 0015114 // phosphate ion transmembrane transporter activity // inferred from electronic annotation /// 0…	Ankh	ankylosis, progressive homolog (mouse)	8.21833	7.68651	8.25525	8.09391	7.65233	7.61776	7.94503	7.52967	0.00708955	380.695	67
1391625_at	0006351 // transcription, DNA-dependent // inferred from electronic annotation /// 0006355 // regulation of transcription, DNA-dependent // inferred from electronic annotation /// 0006461 // protein complex assembly // inferred from electronic annotation /// 0006900 // membrane budding // inferred from direct assay /// 0008154 // actin polymerization or depolymerization // inferred from electroni…	0000139 // Golgi membrane // inferred from direct assay /// 0005730 // nucleolus // inferred from electronic annotation /// 0005730 // nucleolus // not recorded /// 0005737 // cytoplasm // not recorded /// 0016023 // cytoplasmic membrane-bounded vesicle // inferred from direct assay /// 0030027 // lamellipodium // inferred from electronic annotation /// 0030027 // lamellipodium // not recorded //…	0003779 // actin binding // inferred from electronic annotation /// 0005083 // small GTPase regulator activity // inferred from electronic annotation /// 0005515 // protein binding // inferred from physical interaction	Wasl	Wiskott-Aldrich syndrome-like	8.59178	9.00345	8.93942	9.16594	8.7797	8.06595	8.53306	8.65535	0.00704412	382.358	68
1377016_at	---	0005576 // extracellular region // inferred from electronic annotation /// 0005615 // extracellular space // not recorded /// 0005783 // endoplasmic reticulum // inferred from electronic annotation /// 0005783 // endoplasmic reticulum // not recorded /// 0005794 // Golgi apparatus // not recorded	0005509 // calcium ion binding // inferred from electronic annotation	Creld2	cysteine-rich with EGF-like domains 2	9.73663	9.89813	10.0964	9.90624	9.59503	9.47266	9.63627	9.55794	0.00753623	390.349	69
1373011_at	0008631 // induction of apoptosis by oxidative stress // not recorded /// 0019233 // sensory perception of pain // not recorded /// 0019233 // sensory perception of pain // inferred from sequence or structural similarity /// 0033674 // positive regulation of kinase activity // not recorded /// 0043065 // positive regulation of apoptotic process // not recorded /// 0043410 // positive regulation o…	0005622 // intracellular // inferred from electronic annotation /// 0005634 // nucleus // inferred from electronic annotation /// 0005730 // nucleolus // not recorded /// 0005737 // cytoplasm // inferred from electronic annotation /// 0005737 // cytoplasm // not recorded /// 0005783 // endoplasmic reticulum // inferred from electronic annotation /// 0005794 // Golgi apparatus // inferred from ele…	0003676 // nucleic acid binding // inferred from electronic annotation /// 0008270 // zinc ion binding // inferred from electronic annotation	Fam134b /// Zfp622	family with sequence similarity 134, member B /// zinc finger protein 622	10.9162	10.8456	10.5526	11.0484	10.2446	10.5801	10.6722	10.19	0.00744286	390.731	70
1398862_at	0002026 // regulation of the force of heart contraction // inferred from electronic annotation /// 0002026 // regulation of the force of heart contraction // not recorded /// 0006200 // ATP catabolic process // not recorded /// 0006754 // ATP biosynthetic process // inferred from electronic annotation /// 0006810 // transport // inferred from electronic annotation /// 0006811 // ion transport // …	0005624 // membrane fraction // inferred from electronic annotation /// 0005783 // endoplasmic reticulum // inferred from electronic annotation /// 0005789 // endoplasmic reticulum membrane // not recorded /// 0005789 // endoplasmic reticulum membrane // inferred from electronic annotation /// 0005792 // microsome // inferred from electronic annotation /// 0016020 // membrane // not recorded /// …	0000166 // nucleotide binding // inferred from electronic annotation /// 0003824 // catalytic activity // inferred from electronic annotation /// 0005388 // calcium-transporting ATPase activity // inferred from direct assay /// 0005388 // calcium-transporting ATPase activity // not recorded /// 0005388 // calcium-transporting ATPase activity // inferred from electronic annotation /// 0005509 // c…	Atp2a2	ATPase, Ca++ transporting, cardiac muscle, slow twitch 2	8.68927	8.82173	8.74312	8.65819	8.44476	8.42622	8.38703	8.26936	0.00746479	392.377	71
1395914_at	0000278 // mitotic cell cycle // traceable author statement /// 0001934 // positive regulation of protein phosphorylation // not recorded /// 0001934 // positive regulation of protein phosphorylation // inferred from electronic annotation /// 0006468 // protein phosphorylation // inferred from direct assay /// 0006468 // protein phosphorylation // not recorded /// 0006468 // protein phosphorylati…	0005625 // soluble fraction // inferred from direct assay /// 0005634 // nucleus // not recorded /// 0005634 // nucleus // inferred from sequence or structural similarity /// 0005634 // nucleus // inferred from electronic annotation /// 0005737 // cytoplasm // inferred from electronic annotation /// 0005794 // Golgi apparatus // inferred from electronic annotation /// 0005794 // Golgi apparatus /…	0000166 // nucleotide binding // inferred from electronic annotation /// 0001948 // glycoprotein binding // inferred from direct assay /// 0004672 // protein kinase activity // not recorded /// 0004672 // protein kinase activity // inferred from sequence or structural similarity /// 0004672 // protein kinase activity // inferred from electronic annotation /// 0004674 // protein serine/threonine k…	Csnk1d	casein kinase 1, delta	6.88478	7.09361	7.10903	6.8545	6.6534	6.70709	6.69339	6.51824	0.00798611	402.009	72
1397944_at	---	---	---	---	---	7.80697	7.74383	7.62796	7.99877	7.46288	7.4257	7.57467	7.33067	0.00854794	410.826	73
1385365_at	---	0016020 // membrane // inferred from electronic annotation /// 0031227 // intrinsic to endoplasmic reticulum membrane // inferred from electronic annotation	0016758 // transferase activity, transferring hexosyl groups // inferred from electronic annotation	Extl1	exostoses (multiple)-like 1	6.79356	7.29981	7.35689	7.17506	6.879	6.63227	6.61137	6.99656	0.00844595	411.139	74
1379322_at	---	0000502 // proteasome complex // inferred from electronic annotation	---	Psmd7	proteasome (prosome, macropain) 26S subunit, non-ATPase, 7	8.91417	8.8422	9.50354	9.03511	8.80915	8.68194	8.72547	8.74904	0.00918667	421.437	75
1388850_at	0001764 // neuron migration // inferred from mutant phenotype /// 0003009 // skeletal muscle contraction // inferred from expression pattern /// 0006200 // ATP catabolic process // not recorded /// 0006457 // protein folding // traceable author statement /// 0006457 // protein folding // inferred from electronic annotation /// 0006950 // response to stress // inferred from electronic annotation /…	0005622 // intracellular // not recorded /// 0005625 // soluble fraction // inferred from direct assay /// 0005737 // cytoplasm // inferred from direct assay /// 0005737 // cytoplasm // not recorded /// 0005737 // cytoplasm // inferred from electronic annotation /// 0005829 // cytosol // inferred from direct assay /// 0009986 // cell surface // inferred from direct assay /// 0016323 // basolatera…	0000166 // nucleotide binding // inferred from electronic annotation /// 0002134 // UTP binding // inferred from direct assay /// 0002135 // CTP binding // inferred from direct assay /// 0003729 // mRNA binding // inferred from direct assay /// 0005515 // protein binding // inferred from physical interaction /// 0005524 // ATP binding // inferred from direct assay /// 0005524 // ATP binding // in…	Hsp90aa1 /// LOC100362895 /// LOC100365480	heat shock protein 90, alpha (cytosolic), class A member 1 /// heat shock protein 1, alpha-like /// heat shock protein 1, alpha-like	10.6222	10.7976	11.0721	11.1411	10.5906	10.5126	10.6385	10.4371	0.00946053	426.976	76
1377599_at	0000122 // negative regulation of transcription from RNA polymerase II promoter // inferred from electronic annotation /// 0000266 // mitochondrial fission // inferred from electronic annotation /// 0006629 // lipid metabolic process // inferred from electronic annotation /// 0006642 // triglyceride mobilization // inferred from electronic annotation /// 0009062 // fatty acid catabolic process //…	0005634 // nucleus // inferred from electronic annotation /// 0005667 // transcription factor complex // inferred from electronic annotation	0001085 // RNA polymerase II transcription factor binding // inferred from electronic annotation /// 0003713 // transcription coactivator activity // inferred from electronic annotation /// 0008195 // phosphatidate phosphatase activity // inferred from electronic annotation /// 0042826 // histone deacetylase binding // inferred from electronic annotation /// 0042975 // peroxisome proliferator act…	---	---	11.0195	10.5829	10.8544	10.2805	10.192	10.387	11.0558	9.0015	0.00958442	430.221	77
1379888_at	---	---	---	LOC100912602	uncharacterized LOC100912602	6.54368	7.86915	7.37997	6.27091	6.38122	6.18594	6.71657	6.95947	0.00957692	431.492	78
1382040_at	0006412 // translation // inferred from electronic annotation /// 0006418 // tRNA aminoacylation for protein translation // inferred from electronic annotation /// 0006424 // glutamyl-tRNA aminoacylation // inferred from electronic annotation /// 0006433 // prolyl-tRNA aminoacylation // inferred from electronic annotation /// 0043039 // tRNA aminoacylation // inferred from electronic annotation	0005737 // cytoplasm // inferred from electronic annotation	0000166 // nucleotide binding // inferred from electronic annotation /// 0004812 // aminoacyl-tRNA ligase activity // inferred from electronic annotation /// 0004818 // glutamate-tRNA ligase activity // inferred from electronic annotation /// 0004827 // proline-tRNA ligase activity // inferred from electronic annotation /// 0005524 // ATP binding // inferred from electronic annotation /// 0016876…	Eprs	glutamyl-prolyl-tRNA synthetase	7.67779	7.79221	7.69758	7.74426	7.48384	7.28952	7.3965	7.43241	0.00948101	431.823	79
1368147_at	0000188 // inactivation of MAPK activity // not recorded /// 0001706 // endoderm formation // not recorded /// 0006470 // protein dephosphorylation // inferred from direct assay /// 0006470 // protein dephosphorylation // inferred from electronic annotation /// 0007049 // cell cycle // inferred from electronic annotation /// 0009416 // response to light stimulus // inferred from expression patter…	0005625 // soluble fraction // inferred from direct assay /// 0005634 // nucleus // inferred from direct assay /// 0005654 // nucleoplasm // not recorded	0004721 // phosphoprotein phosphatase activity // inferred from electronic annotation /// 0004725 // protein tyrosine phosphatase activity // inferred from electronic annotation /// 0008138 // protein tyrosine/serine/threonine phosphatase activity // inferred from electronic annotation /// 0008330 // protein tyrosine/threonine phosphatase activity // inferred from direct assay /// 0016787 // hydr…	Dusp1	dual specificity phosphatase 1	7.64881	7.00202	6.90123	7.23217	6.96846	6.49615	6.97795	6.72499	0.0095	433.39	80
1385635_at	---	0016020 // membrane // inferred from electronic annotation	0005044 // scavenger receptor activity // inferred from electronic annotation	Cd5l	Cd5 molecule-like	10.1921	10.1791	9.8636	10.0469	9.81959	9.84356	9.70277	9.61098	0.00960494	434.82	81
1386641_at	0006355 // regulation of transcription, DNA-dependent // inferred from electronic annotation	---	0003700 // sequence-specific DNA binding transcription factor activity // inferred from electronic annotation /// 0043565 // sequence-specific DNA binding // inferred from electronic annotation /// 0046983 // protein dimerization activity // inferred from electronic annotation	LOC690286	similar to hepatic leukemia factor	7.87521	8.14243	8.58851	8.6897	7.77862	7.71445	7.9407	8.21563	0.00963415	437.384	82
1385689_at	---	---	---	---	---	7.71198	7.70095	7.5674	7.54046	7.37638	7.10395	7.51177	7.19527	0.00974699	439.731	83
1374855_at	0000122 // negative regulation of transcription from RNA polymerase II promoter // inferred from electronic annotation /// 0000122 // negative regulation of transcription from RNA polymerase II promoter // not recorded /// 0006351 // transcription, DNA-dependent // inferred from electronic annotation /// 0006355 // regulation of transcription, DNA-dependent // inferred from electronic annotation …	0005634 // nucleus // inferred from electronic annotation /// 0005634 // nucleus // not recorded /// 0005737 // cytoplasm // inferred from electronic annotation	0000978 // RNA polymerase II core promoter proximal region sequence-specific DNA binding // inferred from electronic annotation /// 0000978 // RNA polymerase II core promoter proximal region sequence-specific DNA binding // not recorded /// 0000988 // protein binding transcription factor activity // inferred from electronic annotation /// 0000988 // protein binding transcription factor activity /…	Per1	period homolog 1 (Drosophila)	7.74199	7.72418	7.67573	7.23561	6.95795	7.63441	7.49222	6.82615	0.00975	441.583	84
1382760_at	0006810 // transport // inferred from electronic annotation	0005739 // mitochondrion // inferred from electronic annotation /// 0016020 // membrane // inferred from electronic annotation /// 0016021 // integral to membrane // inferred from electronic annotation	---	---	---	6.59353	6.93098	7.0351	6.4414	6.24379	6.42226	6.62458	6.20158	0.00992941	445.849	85
1374858_at	---	0005739 // mitochondrion // inferred from electronic annotation /// 0005739 // mitochondrion // not recorded	0000166 // nucleotide binding // inferred from electronic annotation /// 0003676 // nucleic acid binding // inferred from electronic annotation /// 0004386 // helicase activity // inferred from electronic annotation /// 0005524 // ATP binding // inferred from electronic annotation /// 0008026 // ATP-dependent helicase activity // inferred from electronic annotation /// 0016787 // hydrolase activi…	LOC100362324	DEAH (Asp-Glu-Ala-His) box polypeptide 29	9.27122	9.29967	9.70483	9.55648	9.08359	9.21935	9.23257	9.01032	0.0100581	448.34	86
1391523_at	---	---	---	---	---	8.00819	8.08808	8.24309	8.2049	7.50949	7.88543	7.90355	7.95199	0.0102069	452.074	87
1393241_at	0006508 // proteolysis // inferred from electronic annotation /// 0008152 // metabolic process // not recorded	0005886 // plasma membrane // not recorded /// 0016020 // membrane // inferred from electronic annotation /// 0016020 // membrane // not recorded	0003824 // catalytic activity // inferred from electronic annotation /// 0004252 // serine-type endopeptidase activity // inferred from electronic annotation /// 0008233 // peptidase activity // inferred from electronic annotation /// 0008236 // serine-type peptidase activity // not recorded /// 0008236 // serine-type peptidase activity // inferred from electronic annotation /// 0016787 // hydrol…	Prss32	protease, serine, 32	6.71717	7.45238	7.26187	7.08825	6.51309	6.55609	6.93927	7.06816	0.0103409	454.307	88
1372120_at	0055114 // oxidation-reduction process // inferred from electronic annotation /// 0071569 // protein ufmylation // not recorded /// 0071569 // protein ufmylation // inferred from sequence or structural similarity /// 0071569 // protein ufmylation // inferred from electronic annotation	0005634 // nucleus // inferred from electronic annotation /// 0005737 // cytoplasm // inferred from electronic annotation /// 0005737 // cytoplasm // not recorded /// 0016235 // aggresome // inferred from electronic annotation /// 0016235 // aggresome // not recorded /// 0043231 // intracellular membrane-bounded organelle // not recorded /// 0043231 // intracellular membrane-bounded organelle // …	0000166 // nucleotide binding // inferred from electronic annotation /// 0003824 // catalytic activity // inferred from electronic annotation /// 0005524 // ATP binding // inferred from electronic annotation /// 0016616 // oxidoreductase activity, acting on the CH-OH group of donors, NAD or NADP as acceptor // inferred from electronic annotation /// 0046872 // metal ion binding // inferred from e…	Uba5	ubiquitin-like modifier activating enzyme 5	7.81615	7.82563	8.22317	7.98992	7.46225	7.8108	7.71956	7.6102	0.0103371	455.316	89
1395030_at	---	---	---	---	---	8.1285	7.95668	7.57997	7.88482	7.6954	7.4471	7.77365	7.06678	0.0106556	461.806	90
1370375_at	0006541 // glutamine metabolic process // inferred from electronic annotation /// 0042981 // regulation of apoptotic process // not recorded /// 0072593 // reactive oxygen species metabolic process // not recorded	0005739 // mitochondrion // not recorded /// 0005739 // mitochondrion // inferred from electronic annotation /// 0005759 // mitochondrial matrix // traceable author statement	0004359 // glutaminase activity // inferred from electronic annotation /// 0016787 // hydrolase activity // inferred from electronic annotation	Gls2	glutaminase 2 (liver, mitochondrial)	11.2715	11.2067	11.1946	11.079	10.8906	10.8091	10.8429	10.9596	0.0105385	461.962	91
1373310_at	---	---	---	---	---	8.0826	8.50042	8.16157	7.77479	7.67303	7.60938	8.09433	7.64143	0.010587	464.104	92
1388110_at	0006184 // GTP catabolic process // inferred from electronic annotation /// 0006412 // translation // inferred from electronic annotation /// 0006414 // translational elongation // inferred from direct assay /// 0006414 // translational elongation // inferred from electronic annotation /// 0006916 // anti-apoptosis // inferred from direct assay	0005634 // nucleus // inferred from direct assay /// 0005634 // nucleus // inferred from electronic annotation /// 0005737 // cytoplasm // inferred from direct assay /// 0005737 // cytoplasm // inferred from electronic annotation /// 0005737 // cytoplasm // not recorded /// 0005853 // eukaryotic translation elongation factor 1 complex // inferred from direct assay /// 0043025 // neuronal cell bod…	0000166 // nucleotide binding // inferred from electronic annotation /// 0003746 // translation elongation factor activity // inferred from direct assay /// 0003746 // translation elongation factor activity // inferred from electronic annotation /// 0003924 // GTPase activity // inferred from electronic annotation /// 0005525 // GTP binding // inferred from electronic annotation /// 0019901 // pr…	Eef1a1 /// LOC100360150 /// LOC100360413 /// RGD1566344	eukaryotic translation elongation factor 1 alpha 1 /// eukaryotic translation elongation factor 1 alpha 2 /// eukaryotic translation elongation factor 1 alpha 1-like /// similar to eukaryotic translation elongation factor 1 alpha 1	11.7228	11.655	12.3587	12.3935	12.3221	11.5265	11.5625	11.4435	0.0107097	467.603	93
1389297_at	0006457 // protein folding // not recorded /// 0006457 // protein folding // inferred from electronic annotation /// 0006467 // protein thiol-disulfide exchange // inferred from electronic annotation /// 0006810 // transport // inferred from electronic annotation /// 0022900 // electron transport chain // inferred from electronic annotation /// 0030968 // endoplasmic reticulum unfolded protein re…	0005783 // endoplasmic reticulum // not recorded /// 0005783 // endoplasmic reticulum // inferred from electronic annotation /// 0005789 // endoplasmic reticulum membrane // inferred from electronic annotation /// 0016020 // membrane // inferred from electronic annotation	0016491 // oxidoreductase activity // not recorded /// 0016491 // oxidoreductase activity // inferred from electronic annotation /// 0016671 // oxidoreductase activity, acting on a sulfur group of donors, disulfide as acceptor // inferred from electronic annotation /// 0050660 // flavin adenine dinucleotide binding // inferred from electronic annotation	Ero1l	ERO1-like (S. cerevisiae)	8.31184	8.34578	8.48376	8.35352	8.03837	7.96027	8.07997	8.18481	0.0107447	469.895	94
1385585_at	0006355 // regulation of transcription, DNA-dependent // inferred from electronic annotation	---	0003700 // sequence-specific DNA binding transcription factor activity // inferred from electronic annotation /// 0043565 // sequence-specific DNA binding // inferred from electronic annotation /// 0046983 // protein dimerization activity // inferred from electronic annotation	LOC690286	similar to hepatic leukemia factor	8.02995	8.24479	8.63846	8.74401	7.80943	7.8065	8.13765	8.33578	0.0107368	471.452	95
1372524_at	---	---	---	---	---	11.2161	10.8532	10.9828	10.5434	10.4614	10.6148	11.2582	9.25939	0.0107604	473.686	96
1367771_at	0000122 // negative regulation of transcription from RNA polymerase II promoter // inferred from electronic annotation /// 0000122 // negative regulation of transcription from RNA polymerase II promoter // not recorded /// 0006355 // regulation of transcription, DNA-dependent // inferred from electronic annotation /// 0006916 // anti-apoptosis // inferred from electronic annotation /// 0006916 //…	0005634 // nucleus // inferred from electronic annotation /// 0005634 // nucleus // not recorded /// 0005737 // cytoplasm // inferred from electronic annotation /// 0005737 // cytoplasm // not recorded	0003700 // sequence-specific DNA binding transcription factor activity // inferred from electronic annotation /// 0043426 // MRF binding // inferred from electronic annotation /// 0043426 // MRF binding // not recorded	Tsc22d3	TSC22 domain family, member 3	9.68169	10.428	10.0571	9.3115	9.31764	9.72851	9.61676	9.10746	0.010701	474.104	97
1392936_at	0006397 // mRNA processing // inferred from electronic annotation	---	0000166 // nucleotide binding // inferred from electronic annotation /// 0003676 // nucleic acid binding // inferred from electronic annotation	Rbm25 /// RGD1565486	RNA binding motif protein 25 /// similar to RNA binding motif protein 25	7.89322	7.8835	8.04773	8.20292	7.77908	7.6932	7.61064	7.72244	0.0106224	474.717	98
1371542_at	0006184 // GTP catabolic process // inferred from electronic annotation /// 0007017 // microtubule-based process // inferred from electronic annotation /// 0007018 // microtubule-based movement // inferred from electronic annotation /// 0051258 // protein polymerization // inferred from electronic annotation	0005737 // cytoplasm // inferred from electronic annotation /// 0005856 // cytoskeleton // inferred from electronic annotation /// 0005874 // microtubule // inferred from electronic annotation /// 0005874 // microtubule // not recorded /// 0043234 // protein complex // inferred from electronic annotation	0000166 // nucleotide binding // inferred from electronic annotation /// 0003924 // GTPase activity // inferred from electronic annotation /// 0005198 // structural molecule activity // inferred from electronic annotation /// 0005525 // GTP binding // inferred from electronic annotation	Tuba4a	tubulin, alpha 4A	8.84678	9.12944	9.43199	9.16518	8.80761	8.89597	8.82773	8.72181	0.0110202	480.831	99
1388426_at	0000122 // negative regulation of transcription from RNA polymerase II promoter // inferred from electronic annotation /// 0000122 // negative regulation of transcription from RNA polymerase II promoter // not recorded /// 0003062 // regulation of heart rate by chemical signal // inferred from electronic annotation /// 0003062 // regulation of heart rate by chemical signal // not recorded /// 000…	0000139 // Golgi membrane // inferred from electronic annotation /// 0005634 // nucleus // inferred from direct assay /// 0005634 // nucleus // not recorded /// 0005634 // nucleus // inferred from electronic annotation /// 0005737 // cytoplasm // not recorded /// 0005737 // cytoplasm // inferred from electronic annotation /// 0005783 // endoplasmic reticulum // not recorded /// 0005783 // endopla…	0003677 // DNA binding // not recorded /// 0003677 // DNA binding // inferred from sequence or structural similarity /// 0003677 // DNA binding // inferred from electronic annotation /// 0003682 // chromatin binding // inferred from direct assay /// 0003682 // chromatin binding // inferred from electronic annotation /// 0003682 // chromatin binding // not recorded /// 0003700 // sequence-specific…	Srebf1	sterol regulatory element binding transcription factor 1	9.04643	9.89838	10.6133	10.2921	9.49397	9.48624	9.27894	10.1534	0.01122	484.71	100
1368146_at	0000188 // inactivation of MAPK activity // not recorded /// 0001706 // endoderm formation // not recorded /// 0006470 // protein dephosphorylation // inferred from direct assay /// 0006470 // protein dephosphorylation // inferred from electronic annotation /// 0007049 // cell cycle // inferred from electronic annotation /// 0009416 // response to light stimulus // inferred from expression patter…	0005625 // soluble fraction // inferred from direct assay /// 0005634 // nucleus // inferred from direct assay /// 0005654 // nucleoplasm // not recorded	0004721 // phosphoprotein phosphatase activity // inferred from electronic annotation /// 0004725 // protein tyrosine phosphatase activity // inferred from electronic annotation /// 0008138 // protein tyrosine/serine/threonine phosphatase activity // inferred from electronic annotation /// 0008330 // protein tyrosine/threonine phosphatase activity // inferred from direct assay /// 0016787 // hydr…	Dusp1	dual specificity phosphatase 1	11.8562	11.1739	10.7942	11.6484	11.2093	10.5945	11.1655	10.8487	0.0112079	486.025	101
1372306_at	---	0005634 // nucleus // inferred from electronic annotation /// 0005634 // nucleus // not recorded /// 0005730 // nucleolus // not recorded /// 0005737 // cytoplasm // not recorded /// 0005737 // cytoplasm // inferred from electronic annotation /// 0005739 // mitochondrion // inferred from electronic annotation /// 0005739 // mitochondrion // not recorded	0016787 // hydrolase activity // inferred from electronic annotation	Ethe1	ethylmalonic encephalopathy 1	9.72924	10.1301	10.0185	9.38755	9.46195	9.19023	9.50213	9.61996	0.0113922	488.417	102
1390706_at	0000281 // cytokinesis after mitosis // not recorded /// 0007009 // plasma membrane organization // not recorded /// 0007182 // common-partner SMAD protein phosphorylation // not recorded /// 0007184 // SMAD protein import into nucleus // not recorded /// 0043001 // Golgi to plasma membrane protein transport // not recorded /// 0071709 // membrane assembly // not recorded /// 0072661 // protein t…	0005634 // nucleus // not recorded /// 0005730 // nucleolus // not recorded /// 0005737 // cytoplasm // not recorded /// 0005886 // plasma membrane // not recorded /// 0008091 // spectrin // inferred from electronic annotation /// 0016020 // membrane // not recorded /// 0030863 // cortical cytoskeleton // not recorded /// 0032437 // cuticular plate // not recorded /// 0043234 // protein complex /…	0003779 // actin binding // inferred from electronic annotation /// 0005200 // structural constituent of cytoskeleton // not recorded /// 0005200 // structural constituent of cytoskeleton // inferred from electronic annotation /// 0005543 // phospholipid binding // inferred from electronic annotation /// 0030506 // ankyrin binding // not recorded /// 0032403 // protein complex binding // inferred…	Sptbn1	spectrin, beta, non-erythrocytic 1	7.98542	8.14708	8.14191	8.32308	8.1267	7.63845	7.76683	7.76204	0.0113301	489.096	103
1388587_at	0001562 // response to protozoan // inferred from electronic annotation /// 0001562 // response to protozoan // not recorded /// 0003085 // negative regulation of systemic arterial blood pressure // inferred from electronic annotation /// 0003085 // negative regulation of systemic arterial blood pressure // not recorded /// 0006916 // anti-apoptosis // inferred from electronic annotation /// 0042…	---	---	Ier3	immediate early response 3	8.7367	8.83099	9.12284	9.10091	8.61818	8.30942	8.81713	8.70603	0.0114327	491.954	104
1369044_a_at	0006198 // cAMP catabolic process // inferred from direct assay /// 0006198 // cAMP catabolic process // inferred from electronic annotation /// 0006939 // smooth muscle contraction // not recorded /// 0007165 // signal transduction // inferred from electronic annotation /// 0008152 // metabolic process // inferred from electronic annotation	0005625 // soluble fraction // inferred from direct assay /// 0005626 // insoluble fraction // inferred from direct assay /// 0005634 // nucleus // inferred from direct assay /// 0005737 // cytoplasm // inferred from direct assay /// 0005829 // cytosol // inferred from direct assay /// 0048471 // perinuclear region of cytoplasm // inferred from direct assay	0003824 // catalytic activity // inferred from electronic annotation /// 0004114 // 3',5'-cyclic-nucleotide phosphodiesterase activity // inferred from electronic annotation /// 0004115 // 3',5'-cyclic-AMP phosphodiesterase activity // inferred from direct assay /// 0008081 // phosphoric diester hydrolase activity // inferred from electronic annotation /// 0016787 // hydrolase activity // inferre…	Pde4b	phosphodiesterase 4B, cAMP specific	6.18195	6.67254	6.92757	6.46284	6.11121	6.08673	6.2805	6.40159	0.012219	502.862	105
1390731_at	---	---	---	---	---	8.03679	8.99979	8.46003	7.456	7.43003	8.9376	7.84487	7.45873	0.0126792	508.808	106
1397520_at	0006412 // translation // not recorded /// 0006413 // translational initiation // not recorded /// 0006446 // regulation of translational initiation // not recorded /// 0016070 // RNA metabolic process // inferred from electronic annotation	0005737 // cytoplasm // not recorded /// 0005737 // cytoplasm // inferred from electronic annotation /// 0016281 // eukaryotic translation initiation factor 4F complex // not recorded	0003677 // DNA binding // inferred from electronic annotation /// 0003723 // RNA binding // inferred from electronic annotation /// 0003743 // translation initiation factor activity // not recorded /// 0008135 // translation factor activity, nucleic acid binding // not recorded	Eif4g2	eukaryotic translation initiation factor 4, gamma 2	8.6533	8.80727	8.93048	8.84565	8.55254	8.48227	8.59254	8.42561	0.0126542	509.744	107
1378303_at	---	---	0000166 // nucleotide binding // inferred from electronic annotation /// 0004872 // receptor activity // inferred from electronic annotation	Tnrc6b	trinucleotide repeat containing 6B	7.4868	7.48433	7.55953	7.70993	7.43203	7.16328	7.15583	7.31522	0.012537	509.895	108
1398767_at	0006511 // ubiquitin-dependent protein catabolic process // traceable author statement	0005634 // nucleus // inferred from electronic annotation /// 0005737 // cytoplasm // inferred from electronic annotation	---	Ubb /// Ubc	ubiquitin B /// ubiquitin C	12.7092	12.7285	13.0399	12.9916	12.4456	12.6453	12.6458	12.5648	0.0125413	511.129	109
1386695_at	---	---	---	---	---	7.67462	7.63203	6.94057	7.06803	7.01051	7.19092	7.29147	5.92461	0.0126636	514.014	110
1390819_at	0006351 // transcription, DNA-dependent // inferred from electronic annotation /// 0006355 // regulation of transcription, DNA-dependent // inferred from electronic annotation /// 0045944 // positive regulation of transcription from RNA polymerase II promoter // inferred from direct assay /// 0045944 // positive regulation of transcription from RNA polymerase II promoter // not recorded /// 00459…	0005634 // nucleus // inferred from direct assay /// 0005634 // nucleus // inferred from electronic annotation	0003677 // DNA binding // inferred from electronic annotation /// 0003690 // double-stranded DNA binding // inferred from electronic annotation /// 0003690 // double-stranded DNA binding // not recorded /// 0003700 // sequence-specific DNA binding transcription factor activity // inferred from electronic annotation /// 0042803 // protein homodimerization activity // inferred from direct assay ///…	Tef	thyrotrophic embryonic factor	7.82291	7.82811	7.66478	8.50687	7.47217	7.31196	7.76366	7.76822	0.0128108	517.066	111
1381124_at	---	---	---	---	---	11.7273	11.6531	11.6976	11.9505	11.3502	11.5758	11.5527	11.3649	0.0130982	521.847	112
1370114_a_at	0001878 // response to yeast // inferred from expression pattern /// 0001934 // positive regulation of protein phosphorylation // inferred from mutant phenotype /// 0001953 // negative regulation of cell-matrix adhesion // inferred from electronic annotation /// 0001953 // negative regulation of cell-matrix adhesion // not recorded /// 0006006 // glucose metabolic process // inferred from mutant …	0005622 // intracellular // inferred from electronic annotation /// 0005624 // membrane fraction // inferred from direct assay /// 0005625 // soluble fraction // inferred from direct assay /// 0005634 // nucleus // inferred from direct assay /// 0005737 // cytoplasm // not recorded /// 0005737 // cytoplasm // inferred from electronic annotation /// 0005829 // cytosol // not recorded /// 0005829 /…	0005102 // receptor binding // inferred from physical interaction /// 0005158 // insulin receptor binding // not recorded /// 0005158 // insulin receptor binding // inferred from sequence or structural similarity /// 0005158 // insulin receptor binding // inferred from electronic annotation /// 0005159 // insulin-like growth factor receptor binding // not recorded /// 0005159 // insulin-like grow…	Pik3r1	phosphoinositide-3-kinase, regulatory subunit 1 (alpha)	7.90313	7.61184	7.62515	7.47718	7.40941	7.39816	7.28861	7.35744	0.0131062	523.355	113
1370344_at	0001822 // kidney development // inferred from expression pattern /// 0001933 // negative regulation of protein phosphorylation // inferred from mutant phenotype /// 0006950 // response to stress // inferred from electronic annotation /// 0009408 // response to heat // inferred from direct assay /// 0010628 // positive regulation of gene expression // inferred from mutant phenotype /// 0010629 //…	0005634 // nucleus // inferred from direct assay /// 0005634 // nucleus // inferred from electronic annotation /// 0005634 // nucleus // not recorded /// 0005730 // nucleolus // not recorded /// 0005737 // cytoplasm // inferred from direct assay /// 0005737 // cytoplasm // inferred from electronic annotation /// 0005737 // cytoplasm // not recorded /// 0005811 // lipid particle // inferred from d…	0000166 // nucleotide binding // inferred from electronic annotation /// 0001085 // RNA polymerase II transcription factor binding // inferred from physical interaction /// 0005515 // protein binding // inferred from physical interaction /// 0005524 // ATP binding // inferred from electronic annotation /// 0032403 // protein complex binding // inferred from physical interaction /// 0033613 // act…	Hspa4	heat shock protein 4	9.0145	9.19147	9.2353	9.20831	9.04079	8.80314	8.69848	8.83747	0.0130702	524.107	114
1374800_at	---	---	---	---	---	11.67	11.6236	11.6746	11.9648	11.3288	11.5032	11.5278	11.378	0.0130087	525.013	115
1391378_at	---	---	---	---	---	5.81807	7.081	7.07041	6.56416	6.03927	6.39554	6.458	6.37688	0.0136121	532.977	116
1383111_at	---	---	---	---	---	8.43596	8.5995	8.40666	8.03961	8.3596	7.97776	7.99113	7.95233	0.0138547	536.166	117
1376982_at	---	---	0000166 // nucleotide binding // inferred from electronic annotation /// 0004872 // receptor activity // inferred from electronic annotation	Tnrc6b	trinucleotide repeat containing 6B	8.13451	8.04977	8.09668	8.20648	7.91456	7.72098	7.84524	7.85669	0.0138559	537.657	118
1397478_at	0006351 // transcription, DNA-dependent // inferred from electronic annotation /// 0006355 // regulation of transcription, DNA-dependent // inferred from electronic annotation /// 0033147 // negative regulation of intracellular estrogen receptor signaling pathway // inferred from electronic annotation /// 0033147 // negative regulation of intracellular estrogen receptor signaling pathway // not r…	0005634 // nucleus // not recorded /// 0005634 // nucleus // inferred from sequence or structural similarity /// 0005634 // nucleus // inferred from electronic annotation /// 0005737 // cytoplasm // inferred from electronic annotation /// 0005739 // mitochondrion // not recorded /// 0005739 // mitochondrion // inferred from electronic annotation /// 0005743 // mitochondrial inner membrane // not …	0004872 // receptor activity // inferred from electronic annotation	Phb2	Prohibitin 2	7.13671	6.54635	6.73281	6.77235	6.35455	6.71429	6.4043	6.52683	0.0138067	538.132	119
1368733_at	0007565 // female pregnancy // inferred from electronic annotation /// 0007565 // female pregnancy // not recorded /// 0008210 // estrogen metabolic process // not recorded /// 0008210 // estrogen metabolic process // traceable author statement /// 0008210 // estrogen metabolic process // inferred from electronic annotation /// 0008210 // estrogen metabolic process // inferred from sequence or st…	0005634 // nucleus // not recorded /// 0005634 // nucleus // inferred from electronic annotation /// 0005737 // cytoplasm // inferred from electronic annotation /// 0005737 // cytoplasm // not recorded /// 0031965 // nuclear membrane // inferred from electronic annotation /// 0031965 // nuclear membrane // not recorded	0004304 // estrone sulfotransferase activity // inferred from direct assay /// 0004304 // estrone sulfotransferase activity // inferred from electronic annotation /// 0005496 // steroid binding // inferred from electronic annotation /// 0008146 // sulfotransferase activity // inferred from electronic annotation /// 0008289 // lipid binding // inferred from electronic annotation /// 0016740 // tra…	Sult1e1	sulfotransferase family 1E, estrogen-preferring, member 1	12.9926	13.1123	13.1926	13.0632	12.7311	12.7283	12.8416	12.9258	0.0137	538.443	120
1389113_at	0055085 // transmembrane transport // inferred from electronic annotation	0016021 // integral to membrane // inferred from electronic annotation	---	Slc45a3	solute carrier family 45, member 3	7.66776	8.20362	7.98553	7.46467	7.48321	7.45144	7.72198	7.153	0.0137934	540.741	121
1381542_at	0006986 // response to unfolded protein // inferred from electronic annotation	0005634 // nucleus // not recorded /// 0005634 // nucleus // inferred from electronic annotation /// 0005635 // nuclear envelope // inferred from electronic annotation /// 0005730 // nucleolus // not recorded /// 0005737 // cytoplasm // not recorded /// 0005737 // cytoplasm // inferred from electronic annotation /// 0005783 // endoplasmic reticulum // not recorded /// 0005783 // endoplasmic retic…	---	Ubxn4	UBX domain protein 4	9.19707	9.41578	9.6062	9.30352	9.27604	8.83898	9.11027	9.06044	0.0142787	547.685	122
1386426_at	0003407 // neural retina development // inferred from expression pattern /// 0006754 // ATP biosynthetic process // inferred from electronic annotation /// 0006810 // transport // inferred from electronic annotation /// 0006811 // ion transport // inferred from electronic annotation /// 0006812 // cation transport // inferred from electronic annotation /// 0006816 // calcium ion transport // infe…	0005886 // plasma membrane // inferred from electronic annotation /// 0016020 // membrane // inferred from electronic annotation /// 0016021 // integral to membrane // inferred from electronic annotation /// 0016324 // apical plasma membrane // inferred from direct assay /// 0045121 // membrane raft // inferred from direct assay /// 0045177 // apical part of cell // inferred from direct assay	0000166 // nucleotide binding // inferred from electronic annotation /// 0003824 // catalytic activity // inferred from electronic annotation /// 0005388 // calcium-transporting ATPase activity // inferred from electronic annotation /// 0005516 // calmodulin binding // inferred from electronic annotation /// 0005524 // ATP binding // inferred from electronic annotation /// 0015662 // ATPase activ…	Atp2b1	ATPase, Ca++ transporting, plasma membrane 1	7.74368	7.77412	7.83635	7.92838	7.66327	7.49796	7.41728	7.59082	0.0142276	548.75	123
1380013_at	0006629 // lipid metabolic process // inferred from electronic annotation /// 0008152 // metabolic process // inferred from electronic annotation /// 0019432 // triglyceride biosynthetic process // inferred from electronic annotation /// 0019433 // triglyceride catabolic process // inferred from electronic annotation	0016020 // membrane // inferred from electronic annotation	0004623 // phospholipase A2 activity // inferred from electronic annotation /// 0004806 // triglyceride lipase activity // inferred from electronic annotation /// 0016787 // hydrolase activity // inferred from electronic annotation /// 0051264 // mono-olein transacylation activity // inferred from electronic annotation /// 0051265 // diolein transacylation activity // inferred from electronic ann…	Pnpla3	patatin-like phospholipase domain containing 3	6.42136	8.05962	8.39406	8.3113	6.65382	8.03335	7.85896	7.85138	0.0143226	551.635	124
1373469_at	0007249 // I-kappaB kinase/NF-kappaB cascade // not recorded /// 0007249 // I-kappaB kinase/NF-kappaB cascade // inferred from electronic annotation /// 0007254 // JNK cascade // not recorded /// 0007254 // JNK cascade // inferred from electronic annotation /// 0007266 // Rho protein signal transduction // not recorded /// 0007266 // Rho protein signal transduction // inferred from electronic ann…	---	---	RGD1565496	similar to Butyrate-induced transcript 1	10.1886	10.367	10.4991	10.4591	10.1194	10.0683	10.0991	10.1178	0.014232	551.872	125
1371390_at	0006184 // GTP catabolic process // inferred from electronic annotation /// 0007017 // microtubule-based process // inferred from electronic annotation /// 0007018 // microtubule-based movement // inferred from electronic annotation /// 0051225 // spindle assembly // inferred from electronic annotation /// 0051258 // protein polymerization // inferred from electronic annotation	0005737 // cytoplasm // inferred from electronic annotation /// 0005737 // cytoplasm // not recorded /// 0005856 // cytoskeleton // inferred from electronic annotation /// 0005874 // microtubule // inferred from electronic annotation /// 0005874 // microtubule // not recorded /// 0005929 // cilium // not recorded /// 0033269 // internode region of axon // not recorded /// 0042995 // cell projecti…	0000166 // nucleotide binding // inferred from electronic annotation /// 0003924 // GTPase activity // inferred from electronic annotation /// 0005198 // structural molecule activity // inferred from electronic annotation /// 0005200 // structural constituent of cytoskeleton // inferred from electronic annotation /// 0005525 // GTP binding // inferred from electronic annotation	Tubb4a /// Tubb4b	tubulin, beta 4A class IVa /// tubulin, beta 4B class IVb	10.5874	10.7052	10.9385	10.6898	10.468	10.5263	10.4744	10.3421	0.0145238	556.521	126
1395324_at	---	---	---	---	---	6.89709	6.97073	7.04524	7.02459	6.56066	6.47092	6.88832	6.88145	0.0146378	559.835	127
1370474_at	0000122 // negative regulation of transcription from RNA polymerase II promoter // not recorded /// 0000122 // negative regulation of transcription from RNA polymerase II promoter // inferred from electronic annotation /// 0006351 // transcription, DNA-dependent // inferred from electronic annotation /// 0006355 // regulation of transcription, DNA-dependent // inferred from electronic annotation …	0005634 // nucleus // not recorded /// 0005634 // nucleus // traceable author statement /// 0005634 // nucleus // inferred from electronic annotation	0003677 // DNA binding // inferred from electronic annotation /// 0003690 // double-stranded DNA binding // inferred from direct assay /// 0003700 // sequence-specific DNA binding transcription factor activity // inferred from electronic annotation /// 0003707 // steroid hormone receptor activity // inferred from electronic annotation /// 0004872 // receptor activity // inferred from electronic a…	Thrb	thyroid hormone receptor beta	8.1588	7.77104	7.88919	8.0637	8.08304	7.31222	7.57503	7.51177	0.0149453	564.306	128
1377472_at	---	0016020 // membrane // inferred from electronic annotation /// 0031227 // intrinsic to endoplasmic reticulum membrane // inferred from electronic annotation	0016758 // transferase activity, transferring hexosyl groups // inferred from electronic annotation	Extl1	exostoses (multiple)-like 1	7.35695	7.87313	7.93994	7.65324	7.44819	7.24906	7.29816	7.55327	0.0149302	565.001	129
1390943_at	---	---	---	RGD1359529	similar to chromosome 1 open reading frame 63	8.66546	8.18815	7.81168	7.9301	8.15005	8.22038	7.34214	7.39066	0.0152308	568.421	130
1368376_at	0000122 // negative regulation of transcription from RNA polymerase II promoter // inferred from mutant phenotype /// 0006351 // transcription, DNA-dependent // inferred from electronic annotation /// 0006355 // regulation of transcription, DNA-dependent // inferred from electronic annotation /// 0009749 // response to glucose stimulus // inferred from mutant phenotype /// 0031100 // organ regene…	0005634 // nucleus // not recorded /// 0005634 // nucleus // inferred from sequence or structural similarity /// 0005634 // nucleus // inferred from electronic annotation /// 0005737 // cytoplasm // not recorded /// 0005737 // cytoplasm // inferred from sequence or structural similarity /// 0005737 // cytoplasm // inferred from electronic annotation /// 0043234 // protein complex // inferred from…	0003677 // DNA binding // inferred from electronic annotation /// 0003700 // sequence-specific DNA binding transcription factor activity // inferred from electronic annotation /// 0003707 // steroid hormone receptor activity // inferred from electronic annotation /// 0003714 // transcription corepressor activity // not recorded /// 0003714 // transcription corepressor activity // inferred from se…	Nr0b2	nuclear receptor subfamily 0, group B, member 2	7.97708	9.4552	9.64111	8.3976	7.6735	8.99613	8.49829	9.17655	0.0153435	570.969	131
1391544_at	0006629 // lipid metabolic process // inferred from electronic annotation /// 0008152 // metabolic process // inferred from electronic annotation /// 0019432 // triglyceride biosynthetic process // inferred from electronic annotation /// 0019433 // triglyceride catabolic process // inferred from electronic annotation	0016020 // membrane // inferred from electronic annotation	0004623 // phospholipase A2 activity // inferred from electronic annotation /// 0004806 // triglyceride lipase activity // inferred from electronic annotation /// 0016787 // hydrolase activity // inferred from electronic annotation /// 0051264 // mono-olein transacylation activity // inferred from electronic annotation /// 0051265 // diolein transacylation activity // inferred from electronic ann…	Pnpla3	patatin-like phospholipase domain containing 3	6.68499	8.37353	8.50683	8.75689	7.17191	8.23599	8.21587	8.0092	0.015553	574.219	132
1391643_at	---	---	---	---	---	9.25407	9.07733	8.51184	9.21483	9.08427	8.29576	9.03519	8.19339	0.0154962	574.64	133
1388322_at	0006446 // regulation of translational initiation // not recorded /// 0016070 // RNA metabolic process // inferred from electronic annotation /// 0030324 // lung development // inferred from expression pattern /// 0045471 // response to ethanol // inferred from expression pattern	0005737 // cytoplasm // not recorded /// 0005737 // cytoplasm // inferred from electronic annotation /// 0016281 // eukaryotic translation initiation factor 4F complex // inferred from direct assay	0003677 // DNA binding // inferred from electronic annotation /// 0003723 // RNA binding // inferred from electronic annotation /// 0008190 // eukaryotic initiation factor 4E binding // inferred from physical interaction	Eif4g1	eukaryotic translation initiation factor 4 gamma, 1	9.27431	9.29437	9.46091	9.54658	9.06867	9.21682	9.21122	8.98572	0.0159776	579.591	134
1398451_at	---	---	---	---	---	7.78796	8.09455	8.27203	7.90579	7.74757	7.60491	7.65315	7.89378	0.0161259	582.225	135
1390097_at	0006334 // nucleosome assembly // inferred from electronic annotation	0005634 // nucleus // inferred from electronic annotation	---	Tspyl4	TSPY-like 4	7.58716	8.24665	8.01176	7.74338	7.23861	7.50805	7.65003	7.7558	0.0161838	584.071	136
1379812_at	0010243 // response to organic nitrogen // inferred from expression pattern /// 0031100 // organ regeneration // inferred from expression pattern /// 0032259 // methylation // inferred from electronic annotation /// 0042493 // response to drug // inferred from expression pattern	0005625 // soluble fraction // inferred from direct assay	0008112 // nicotinamide N-methyltransferase activity // inferred from electronic annotation /// 0008168 // methyltransferase activity // inferred from electronic annotation /// 0016740 // transferase activity // inferred from electronic annotation	Nnmt	nicotinamide N-methyltransferase	10.0155	9.35365	9.59348	9.40401	9.28014	9.27725	9.37289	9.19616	0.0160876	584.149	137
1382048_at	0006810 // transport // inferred from electronic annotation /// 0006811 // ion transport // inferred from electronic annotation /// 0015991 // ATP hydrolysis coupled proton transport // inferred from electronic annotation /// 0015992 // proton transport // inferred from electronic annotation /// 0046034 // ATP metabolic process // inferred from electronic annotation	0005739 // mitochondrion // inferred from electronic annotation /// 0005739 // mitochondrion // not recorded /// 0005829 // cytosol // inferred from electronic annotation /// 0005829 // cytosol // not recorded /// 0005886 // plasma membrane // not recorded /// 0005886 // plasma membrane // inferred from electronic annotation /// 0005902 // microvillus // inferred from electronic annotation /// 00…	0005524 // ATP binding // inferred from electronic annotation /// 0016820 // hydrolase activity, acting on acid anhydrides, catalyzing transmembrane movement of substances // inferred from electronic annotation /// 0046933 // hydrogen ion transporting ATP synthase activity, rotational mechanism // inferred from electronic annotation /// 0046961 // proton-transporting ATPase activity, rotational m…	Atp6v1a	ATPase, H+ transporting, lysosomal V1 subunit A	8.15304	8.3835	8.3993	8.34674	8.17371	7.92131	7.99861	7.9947	0.0159783	584.191	138
1372484_at	---	---	---	---	---	10.7681	10.7788	10.8369	10.7755	10.6483	10.3338	10.5343	10.5553	0.0163165	589.224	139
1392587_at	---	---	---	---	---	10.6485	10.0909	9.99986	10.1259	10.0527	10.0129	9.84453	9.63734	0.0169643	596.694	140
1391654_at	---	---	---	---	---	7.14902	6.75609	6.68752	6.82301	6.64016	6.41335	6.68489	6.57737	0.016844	596.725	141
1379411_at	---	---	---	LOC100911353	uncharacterized LOC100911353	7.45099	7.77893	8.16567	8.10672	7.54949	8.03906	7.43093	7.2846	0.0173732	602.255	142
1375895_at	0042254 // ribosome biogenesis // inferred from electronic annotation	0005634 // nucleus // inferred from electronic annotation	---	LOC100360406	rCG34104-like	8.71644	8.77251	9.08335	8.88617	8.41977	8.62843	8.73543	8.50485	0.0176154	606.721	143
1372560_at	---	---	---	---	---	7.33575	7.97522	7.79856	7.59848	7.06533	7.54637	7.69759	7.05326	0.0179931	610.574	144
1370151_at	0000050 // urea cycle // inferred from direct assay /// 0000050 // urea cycle // inferred from electronic annotation /// 0001101 // response to acid // inferred from expression pattern /// 0001889 // liver development // inferred from expression pattern /// 0005980 // glycogen catabolic process // inferred from electronic annotation /// 0005980 // glycogen catabolic process // not recorded /// 00…	0005634 // nucleus // inferred from electronic annotation /// 0005730 // nucleolus // inferred from electronic annotation /// 0005737 // cytoplasm // inferred from direct assay /// 0005739 // mitochondrion // inferred from direct assay /// 0005739 // mitochondrion // not recorded /// 0005739 // mitochondrion // inferred from electronic annotation /// 0005743 // mitochondrial inner membrane // inf…	0000166 // nucleotide binding // inferred from electronic annotation /// 0003824 // catalytic activity // inferred from electronic annotation /// 0004087 // carbamoyl-phosphate synthase (ammonia) activity // inferred from direct assay /// 0004087 // carbamoyl-phosphate synthase (ammonia) activity // inferred from electronic annotation /// 0004087 // carbamoyl-phosphate synthase (ammonia) activity…	Cps1	carbamoyl-phosphate synthetase 1	12.3659	12.3271	12.4248	12.3506	11.9513	12.1442	12.2567	12.0543	0.0179034	610.719	145
1389844_at	0000413 // protein peptidyl-prolyl isomerization // inferred from electronic annotation /// 0006457 // protein folding // inferred from electronic annotation /// 0006463 // steroid hormone receptor complex assembly // inferred from electronic annotation /// 0006463 // steroid hormone receptor complex assembly // not recorded /// 0006825 // copper ion transport // inferred from mutant phenotype //…	0005634 // nucleus // inferred from electronic annotation /// 0005634 // nucleus // not recorded /// 0005730 // nucleolus // not recorded /// 0005737 // cytoplasm // not recorded /// 0005737 // cytoplasm // inferred from electronic annotation /// 0005829 // cytosol // inferred from direct assay /// 0005829 // cytosol // inferred from electronic annotation /// 0005856 // cytoskeleton // inferred f…	0003755 // peptidyl-prolyl cis-trans isomerase activity // inferred from electronic annotation /// 0005524 // ATP binding // inferred from electronic annotation /// 0005524 // ATP binding // not recorded /// 0005525 // GTP binding // inferred from electronic annotation /// 0005525 // GTP binding // not recorded /// 0016853 // isomerase activity // inferred from electronic annotation /// 0031072 /…	Fkbp4	FK506 binding protein 4	8.38961	8.72428	8.80261	8.75064	8.31246	8.46379	8.43651	8.19217	0.017911	611.794	146
1377051_at	0072593 // reactive oxygen species metabolic process // not recorded	0005739 // mitochondrion // inferred from electronic annotation /// 0005739 // mitochondrion // not recorded /// 0005777 // peroxisome // not recorded /// 0016021 // integral to membrane // inferred from electronic annotation	0005102 // receptor binding // not recorded	LOC100362572 /// LOC100366119	Mpv17 transgene, kidney disease mutant-like (predicted)-like /// Mpv17 transgene, kidney disease mutant-like (predicted)-like	9.53228	9.49976	9.57446	9.37466	9.44214	8.96678	9.11985	9.3048	0.0179592	613.006	147
1384262_at	0005975 // carbohydrate metabolic process // inferred from electronic annotation /// 0005977 // glycogen metabolic process // inferred from electronic annotation /// 0005979 // regulation of glycogen biosynthetic process // inferred from direct assay /// 0005981 // regulation of glycogen catabolic process // inferred from direct assay	0000164 // protein phosphatase type 1 complex // inferred from direct assay /// 0005625 // soluble fraction // inferred from direct assay /// 0005792 // microsome // inferred from direct assay /// 0042587 // glycogen granule // inferred from direct assay	0004721 // phosphoprotein phosphatase activity // inferred from direct assay /// 0019888 // protein phosphatase regulator activity // inferred from direct assay /// 0019899 // enzyme binding // inferred from direct assay /// 0019899 // enzyme binding // inferred from mutant phenotype /// 0019899 // enzyme binding // inferred from physical interaction	Ppp1r3b	protein phosphatase 1, regulatory subunit 3B	10.8222	11.444	11.1279	10.908	11.0675	11.0527	10.4149	10.3707	0.0179797	614.094	148
1371019_at	0006468 // protein phosphorylation // inferred from electronic annotation /// 0006469 // negative regulation of protein kinase activity // not recorded /// 0007254 // JNK cascade // not recorded /// 0014912 // negative regulation of smooth muscle cell migration // not recorded /// 0031665 // negative regulation of lipopolysaccharide-mediated signaling pathway // not recorded /// 0032436 // positi…	0005634 // nucleus // not recorded /// 0005737 // cytoplasm // not recorded	0004672 // protein kinase activity // inferred from electronic annotation /// 0004860 // protein kinase inhibitor activity // not recorded /// 0004872 // receptor activity // inferred from electronic annotation /// 0005524 // ATP binding // inferred from electronic annotation /// 0008134 // transcription factor binding // not recorded /// 0016772 // transferase activity, transferring phosphorus-c…	Trib1	tribbles homolog 1 (Drosophila)	7.40455	7.13273	6.95744	7.30319	7.14814	6.47149	7.07295	6.6605	0.0178658	614.25	149
1371104_at	0000122 // negative regulation of transcription from RNA polymerase II promoter // inferred from electronic annotation /// 0000122 // negative regulation of transcription from RNA polymerase II promoter // not recorded /// 0003062 // regulation of heart rate by chemical signal // inferred from electronic annotation /// 0003062 // regulation of heart rate by chemical signal // not recorded /// 000…	0000139 // Golgi membrane // inferred from electronic annotation /// 0005634 // nucleus // inferred from direct assay /// 0005634 // nucleus // not recorded /// 0005634 // nucleus // inferred from electronic annotation /// 0005737 // cytoplasm // not recorded /// 0005737 // cytoplasm // inferred from electronic annotation /// 0005783 // endoplasmic reticulum // not recorded /// 0005783 // endopla…	0003677 // DNA binding // not recorded /// 0003677 // DNA binding // inferred from sequence or structural similarity /// 0003677 // DNA binding // inferred from electronic annotation /// 0003682 // chromatin binding // inferred from direct assay /// 0003682 // chromatin binding // inferred from electronic annotation /// 0003682 // chromatin binding // not recorded /// 0003700 // sequence-specific…	Srebf1	sterol regulatory element binding transcription factor 1	6.8908	7.36994	8.05576	7.72348	7.04334	7.08888	6.93372	7.4921	0.0177667	614.506	150
1367834_at	0008295 // spermidine biosynthetic process // inferred from direct assay /// 0008295 // spermidine biosynthetic process // not recorded /// 0008295 // spermidine biosynthetic process // inferred from electronic annotation	---	0003824 // catalytic activity // inferred from electronic annotation /// 0004766 // spermidine synthase activity // inferred from direct assay /// 0004766 // spermidine synthase activity // not recorded /// 0004766 // spermidine synthase activity // inferred from electronic annotation /// 0016740 // transferase activity // inferred from electronic annotation /// 0042803 // protein homodimerizatio…	Srm	spermidine synthase	8.06458	7.7503	8.28462	8.18293	7.60934	7.85482	7.95944	7.62265	0.0178344	615.96	151
1389405_at	---	---	---	Chd9	chromodomain helicase DNA binding protein 9	7.86078	8.24019	7.92438	8.24081	7.7587	7.59106	7.91462	7.83523	0.0178684	618.108	152
1369427_at	---	0016020 // membrane // inferred from electronic annotation /// 0016021 // integral to membrane // inferred from electronic annotation	---	Mpeg1	macrophage expressed 1	6.89528	7.18225	6.80096	7.15705	6.85097	6.71662	6.68747	6.61349	0.0178497	619.352	153
1387981_at	0007165 // signal transduction // inferred from electronic annotation /// 0007186 // G-protein coupled receptor signaling pathway // inferred from electronic annotation /// 0007608 // sensory perception of smell // inferred from electronic annotation /// 0050896 // response to stimulus // inferred from electronic annotation /// 0050911 // detection of chemical stimulus involved in sensory percept…	0005886 // plasma membrane // inferred from electronic annotation /// 0016020 // membrane // inferred from electronic annotation /// 0016021 // integral to membrane // inferred from electronic annotation	0004871 // signal transducer activity // inferred from electronic annotation /// 0004872 // receptor activity // inferred from electronic annotation /// 0004930 // G-protein coupled receptor activity // inferred from electronic annotation /// 0004984 // olfactory receptor activity // inferred from electronic annotation /// 0004984 // olfactory receptor activity // inferred from sequence or struct…	Olr59	olfactory receptor 59	8.44369	9.05225	8.69863	8.60187	8.41109	8.33233	8.34609	8.58481	0.0184481	626.949	154
1395721_at	0000103 // sulfate assimilation // inferred from electronic annotation /// 0000103 // sulfate assimilation // not recorded /// 0007596 // blood coagulation // not recorded /// 0007596 // blood coagulation // inferred from electronic annotation /// 0016310 // phosphorylation // not recorded /// 0060348 // bone development // not recorded /// 0060348 // bone development // inferred from electronic …	---	0004020 // adenylylsulfate kinase activity // inferred from electronic annotation /// 0004020 // adenylylsulfate kinase activity // not recorded /// 0004781 // sulfate adenylyltransferase (ATP) activity // inferred from electronic annotation /// 0004781 // sulfate adenylyltransferase (ATP) activity // not recorded /// 0005524 // ATP binding // inferred from electronic annotation	Papss2	3'-phosphoadenosine 5'-phosphosulfate synthase 2	9.29125	9.83593	9.91353	9.19568	9.38836	8.99883	9.13484	9.31539	0.0184194	627.777	155
1383665_at	0006629 // lipid metabolic process // inferred from electronic annotation /// 0006629 // lipid metabolic process // not recorded /// 0016311 // dephosphorylation // not recorded /// 0045944 // positive regulation of transcription from RNA polymerase II promoter // inferred from electronic annotation /// 0045944 // positive regulation of transcription from RNA polymerase II promoter // not recorded	0005789 // endoplasmic reticulum membrane // inferred from electronic annotation /// 0005789 // endoplasmic reticulum membrane // not recorded /// 0005829 // cytosol // inferred from electronic annotation /// 0005829 // cytosol // not recorded	0003713 // transcription coactivator activity // inferred from electronic annotation /// 0003713 // transcription coactivator activity // not recorded /// 0008195 // phosphatidate phosphatase activity // inferred from electronic annotation /// 0008195 // phosphatidate phosphatase activity // not recorded	Lpin2	lipin 2	8.49604	9.10946	8.96561	8.93501	8.4675	8.33745	9.06661	8.38102	0.0185577	630.041	156
1381548_at	0006810 // transport // inferred from electronic annotation	0005634 // nucleus // inferred from electronic annotation /// 0005634 // nucleus // not recorded /// 0005730 // nucleolus // not recorded /// 0005768 // endosome // inferred from electronic annotation /// 0005794 // Golgi apparatus // inferred from electronic annotation /// 0005794 // Golgi apparatus // not recorded /// 0010008 // endosome membrane // inferred from electronic annotation /// 00160…	---	Golim4	golgi integral membrane protein 4	6.35794	6.48232	6.47223	6.61827	6.35849	6.0601	6.16452	6.20466	0.0189299	634.595	157
1396300_at	---	---	---	Afmid	arylformamidase	8.84229	8.99474	9.02245	9.07417	8.73394	8.77307	8.82682	8.56718	0.0188228	634.709	158
1384854_at	---	---	---	---	---	7.43792	7.50229	7.652	7.54186	7.45665	7.11119	7.15168	7.2922	0.0189497	636.919	159
1378332_at	---	0005622 // intracellular // inferred from electronic annotation	0003676 // nucleic acid binding // inferred from electronic annotation /// 0008270 // zinc ion binding // inferred from electronic annotation	Klf3	Kruppel-like factor 3 (basic)	7.63349	8.14364	7.99906	7.73663	7.55045	7.38367	7.52711	7.88687	0.0189	637.662	160
1379691_at	0006397 // mRNA processing // inferred from electronic annotation /// 0008380 // RNA splicing // inferred from electronic annotation	0005634 // nucleus // inferred from electronic annotation /// 0005681 // spliceosomal complex // inferred from electronic annotation	---	Prpf38b	PRP38 pre-mRNA processing factor 38 (yeast) domain containing B	7.63327	7.6904	7.65822	7.85636	7.54237	7.40558	7.36427	7.52401	0.0188447	638.401	161
1393878_at	---	---	---	---	---	6.70906	6.61053	6.7531	6.59289	6.39029	6.18555	6.54644	6.50687	0.0187778	639.17	162
1383455_at	0006412 // translation // inferred from electronic annotation /// 0006418 // tRNA aminoacylation for protein translation // inferred from electronic annotation /// 0006424 // glutamyl-tRNA aminoacylation // inferred from electronic annotation /// 0006433 // prolyl-tRNA aminoacylation // inferred from electronic annotation /// 0043039 // tRNA aminoacylation // inferred from electronic annotation	0005737 // cytoplasm // inferred from electronic annotation	0000166 // nucleotide binding // inferred from electronic annotation /// 0004812 // aminoacyl-tRNA ligase activity // inferred from electronic annotation /// 0004818 // glutamate-tRNA ligase activity // inferred from electronic annotation /// 0004827 // proline-tRNA ligase activity // inferred from electronic annotation /// 0005524 // ATP binding // inferred from electronic annotation /// 0016876…	Eprs	glutamyl-prolyl-tRNA synthetase	11.1937	11.1706	11.1732	11.1072	10.9259	10.8437	10.9305	10.9234	0.0187423	639.573	163
1371442_at	0001666 // response to hypoxia // inferred from direct assay	0005783 // endoplasmic reticulum // inferred from electronic annotation /// 0005788 // endoplasmic reticulum lumen // inferred from electronic annotation	0000166 // nucleotide binding // inferred from electronic annotation /// 0005524 // ATP binding // inferred from electronic annotation	Hyou1	hypoxia up-regulated 1	7.63956	7.64495	7.73108	7.55913	7.5526	7.2884	7.42689	7.28617	0.0188841	642.986	164
1380611_at	0000413 // protein peptidyl-prolyl isomerization // not recorded /// 0000413 // protein peptidyl-prolyl isomerization // inferred from electronic annotation /// 0006457 // protein folding // inferred from electronic annotation /// 0018208 // peptidyl-proline modification // not recorded	0005634 // nucleus // inferred from electronic annotation /// 0005634 // nucleus // not recorded /// 0005730 // nucleolus // not recorded /// 0016020 // membrane // not recorded	0003755 // peptidyl-prolyl cis-trans isomerase activity // not recorded /// 0003755 // peptidyl-prolyl cis-trans isomerase activity // inferred from electronic annotation /// 0005528 // FK506 binding // not recorded /// 0016853 // isomerase activity // inferred from electronic annotation /// 0031072 // heat shock protein binding // inferred from electronic annotation /// 0031072 // heat shock pro…	Fkbp5	FK506 binding protein 5	6.9847	7.48698	7.5992	7.79446	6.92401	7.38986	7.47663	6.95616	0.0192061	647.703	165
1393860_at	0030042 // actin filament depolymerization // inferred from sequence or structural similarity /// 0055114 // oxidation-reduction process // inferred from sequence or structural similarity	0005737 // cytoplasm // inferred from electronic annotation /// 0005856 // cytoskeleton // inferred from electronic annotation	0003779 // actin binding // inferred from sequence or structural similarity /// 0008270 // zinc ion binding // inferred from electronic annotation /// 0016491 // oxidoreductase activity // inferred from electronic annotation /// 0016709 // oxidoreductase activity, acting on paired donors, with incorporation or reduction of molecular oxygen, NADH or NADPH as one donor, and incorporation of one ato…	Mical2	Microtubule associated monoxygenase, calponin and LIM domain containing 2	6.85818	7.14829	7.09128	7.148	6.73728	6.71366	6.9008	6.77015	0.0193434	650.335	166
1367522_at	---	0005634 // nucleus // not recorded	---	F8a1	coagulation factor VIII-associated 1	8.5236	8.52159	9.173	8.64646	8.52144	8.54293	8.48575	7.89182	0.0193054	650.787	167
1368249_at	0010001 // glial cell differentiation // not recorded /// 0010001 // glial cell differentiation // inferred from electronic annotation /// 0015758 // glucose transport // not recorded /// 0015758 // glucose transport // inferred from electronic annotation /// 0045893 // positive regulation of transcription, DNA-dependent // not recorded /// 0045893 // positive regulation of transcription, DNA-dep…	0005622 // intracellular // inferred from electronic annotation /// 0005634 // nucleus // not recorded /// 0005634 // nucleus // inferred from electronic annotation /// 0005730 // nucleolus // not recorded /// 0005730 // nucleolus // inferred from electronic annotation	0003676 // nucleic acid binding // inferred from electronic annotation /// 0003677 // DNA binding // not recorded /// 0003677 // DNA binding // inferred from electronic annotation /// 0003700 // sequence-specific DNA binding transcription factor activity // not recorded /// 0003700 // sequence-specific DNA binding transcription factor activity // inferred from electronic annotation /// 0008270 //…	Klf15	Kruppel-like factor 15	10.1698	10.3218	10.4139	9.88808	9.40584	9.83884	10.2672	10.0167	0.0196012	655.338	168
1387870_at	0000122 // negative regulation of transcription from RNA polymerase II promoter // inferred from electronic annotation /// 0000122 // negative regulation of transcription from RNA polymerase II promoter // not recorded /// 0000288 // nuclear-transcribed mRNA catabolic process, deadenylation-dependent decay // not recorded /// 0000288 // nuclear-transcribed mRNA catabolic process, deadenylation-de…	0005634 // nucleus // inferred from direct assay /// 0005634 // nucleus // not recorded /// 0005634 // nucleus // inferred from sequence or structural similarity /// 0005634 // nucleus // inferred from electronic annotation /// 0005737 // cytoplasm // inferred from direct assay /// 0005737 // cytoplasm // not recorded /// 0005737 // cytoplasm // inferred from sequence or structural similarity ///…	0003676 // nucleic acid binding // inferred from electronic annotation /// 0003677 // DNA binding // inferred from electronic annotation /// 0003729 // mRNA binding // inferred from electronic annotation /// 0003729 // mRNA binding // not recorded /// 0008270 // zinc ion binding // inferred from electronic annotation /// 0017091 // AU-rich element binding // not recorded /// 0017091 // AU-rich el…	Zfp36	zinc finger protein 36	8.43263	8.45499	8.4081	8.34019	8.06691	8.21363	8.3114	8.04264	0.0195325	655.947	169
1378346_at	---	---	---	---	---	6.96024	7.35271	7.31122	7.13727	6.72944	6.80119	7.18955	6.85778	0.0194824	656.272	170
1384934_at	---	---	---	Slc41a2	Solute carrier family 41, member 2	11.1273	11.3147	11.3516	11.3913	11.0821	11.0092	11.0098	11.0994	0.0194094	656.797	171
1390549_at	0007507 // heart development // inferred from expression pattern /// 0007565 // female pregnancy // inferred from expression pattern /// 0007584 // response to nutrient // inferred from expression pattern /// 0030308 // negative regulation of cell growth // inferred from mutant phenotype /// 0046326 // positive regulation of glucose import // inferred from mutant phenotype	0016021 // integral to membrane // inferred from electronic annotation	0004872 // receptor activity // not recorded /// 0004872 // receptor activity // inferred from electronic annotation /// 0042802 // identical protein binding // not recorded /// 0046982 // protein heterodimerization activity // not recorded	Adipor2	adiponectin receptor 2	9.28508	9.27016	9.4574	9.20777	9.18084	9.00164	8.94215	9.12751	0.0199419	662.829	172
1375901_at	0009615 // response to virus // not recorded /// 0043330 // response to exogenous dsRNA // not recorded	0005634 // nucleus // not recorded /// 0005634 // nucleus // inferred from electronic annotation /// 0005730 // nucleolus // inferred from electronic annotation /// 0005730 // nucleolus // not recorded	0000166 // nucleotide binding // inferred from electronic annotation /// 0003676 // nucleic acid binding // inferred from electronic annotation /// 0003723 // RNA binding // inferred from electronic annotation /// 0003725 // double-stranded RNA binding // not recorded /// 0004386 // helicase activity // inferred from electronic annotation /// 0005524 // ATP binding // inferred from electronic ann…	Ddx21	DEAD (Asp-Glu-Ala-Asp) box polypeptide 21	8.71196	8.4591	8.96785	8.79628	8.45631	8.4355	8.57507	8.4028	0.0198324	662.853	173
1374883_at	0016311 // dephosphorylation // inferred from electronic annotation /// 0035335 // peptidyl-tyrosine dephosphorylation // inferred from electronic annotation /// 0046855 // inositol phosphate dephosphorylation // inferred from electronic annotation /// 0046856 // phosphatidylinositol dephosphorylation // inferred from electronic annotation	0005624 // membrane fraction // inferred from electronic annotation /// 0005829 // cytosol // inferred from electronic annotation	0004725 // protein tyrosine phosphatase activity // inferred from electronic annotation /// 0016787 // hydrolase activity // inferred from electronic annotation /// 0016791 // phosphatase activity // inferred from electronic annotation	Mtmr7	myotubularin related protein 7	7.50647	7.99152	7.89735	7.43778	6.99766	7.29726	7.48631	7.8678	0.0198333	663.719	174
1371954_at	---	---	---	Tns1	Tensin 1	8.45678	8.56187	8.2169	8.56149	8.14495	8.21559	8.26946	8.07472	0.0197257	663.764	175
1382516_at	---	---	---	---	---	7.72319	8.27129	8.12839	8.36682	7.63716	8.08709	7.97592	7.66857	0.0197841	665.17	176
1371754_at	0006810 // transport // inferred from electronic annotation /// 0055085 // transmembrane transport // inferred from electronic annotation	0005739 // mitochondrion // not recorded /// 0005739 // mitochondrion // inferred from electronic annotation /// 0005743 // mitochondrial inner membrane // inferred from electronic annotation /// 0016020 // membrane // inferred from electronic annotation /// 0016021 // integral to membrane // inferred from electronic annotation	0005509 // calcium ion binding // inferred from electronic annotation	Slc25a25	solute carrier family 25 (mitochondrial carrier, phosphate carrier), member 25	10.2236	9.59735	9.88098	9.95342	9.77893	9.24869	9.61268	9.67075	0.0196723	665.174	177
1393352_at	---	---	---	RGD1310552	similar to hypothetical protein MGC38960	9.4662	9.66121	9.5433	9.13452	9.24435	8.84792	9.26312	9.16169	0.0199494	668.614	178
1390443_at	---	---	---	RGD1563888	similar to DNA segment, Chr 16, ERATO Doi 472, expressed	8.91977	8.98446	8.99135	8.85874	8.73129	8.57999	8.74712	8.70753	0.0201676	671.763	179
1386987_at	0008284 // positive regulation of cell proliferation // inferred from mutant phenotype /// 0008284 // positive regulation of cell proliferation // not recorded /// 0008284 // positive regulation of cell proliferation // inferred from electronic annotation /// 0010332 // response to gamma radiation // inferred from expression pattern /// 0010536 // positive regulation of activation of Janus kinase…	0005576 // extracellular region // not recorded /// 0005576 // extracellular region // inferred from electronic annotation /// 0005615 // extracellular space // inferred from direct assay /// 0005615 // extracellular space // not recorded /// 0005896 // interleukin-6 receptor complex // inferred from electronic annotation /// 0005896 // interleukin-6 receptor complex // not recorded /// 0009986 /…	0004872 // receptor activity // inferred from electronic annotation /// 0004896 // cytokine receptor activity // inferred from electronic annotation /// 0004897 // ciliary neurotrophic factor receptor activity // inferred from electronic annotation /// 0004897 // ciliary neurotrophic factor receptor activity // not recorded /// 0004915 // interleukin-6 receptor activity // inferred from mutant ph…	Il6r	interleukin 6 receptor	9.52645	9.85323	9.81044	9.48515	9.12044	9.41611	9.72179	9.28407	0.0201111	672.401	180
1395237_at	0006184 // GTP catabolic process // inferred from electronic annotation /// 0006412 // translation // inferred from electronic annotation /// 0006413 // translational initiation // not recorded /// 0006413 // translational initiation // inferred from electronic annotation /// 0006413 // translational initiation // non-traceable author statement /// 0006446 // regulation of translational initiatio…	0005737 // cytoplasm // inferred from electronic annotation	0000166 // nucleotide binding // inferred from electronic annotation /// 0003743 // translation initiation factor activity // not recorded /// 0003743 // translation initiation factor activity // non-traceable author statement /// 0003743 // translation initiation factor activity // inferred from electronic annotation /// 0003924 // GTPase activity // inferred from electronic annotation /// 00055…	Eif5b	eukaryotic translation initiation factor 5B	8.79492	8.73285	9.09134	8.81333	8.64237	8.54588	8.57137	8.71811	0.0200497	672.946	181
1372760_at	---	---	---	---	---	8.87614	8.63575	8.69903	8.73277	8.75784	8.17296	8.32217	8.40085	0.0199396	673.017	182
1370020_at	0006810 // transport // inferred from electronic annotation /// 0006817 // phosphate ion transport // inferred from direct assay /// 0006839 // mitochondrial transport // inferred from electronic annotation /// 0008272 // sulfate transport // inferred from direct assay /// 0015709 // thiosulfate transport // inferred from direct assay /// 0015743 // malate transport // inferred from direct assay …	0005634 // nucleus // inferred from electronic annotation /// 0005634 // nucleus // not recorded /// 0005730 // nucleolus // not recorded /// 0005739 // mitochondrion // not recorded /// 0005739 // mitochondrion // traceable author statement /// 0005739 // mitochondrion // inferred from electronic annotation /// 0005743 // mitochondrial inner membrane // inferred from electronic annotation /// 00…	0015114 // phosphate ion transmembrane transporter activity // inferred from direct assay /// 0015116 // sulfate transmembrane transporter activity // inferred from direct assay /// 0015117 // thiosulfate transmembrane transporter activity // inferred from direct assay /// 0015140 // malate transmembrane transporter activity // inferred from direct assay /// 0015141 // succinate transmembrane tra…	Slc25a10	solute carrier family 25 (mitochondrial carrier; dicarboxylate transporter), member 10	8.63775	8.76659	9.03362	9.06674	8.46615	8.58156	8.48298	8.85029	0.0200601	675.404	183
1398606_at	0006810 // transport // inferred from electronic annotation	0005634 // nucleus // inferred from electronic annotation /// 0005634 // nucleus // not recorded /// 0005730 // nucleolus // not recorded /// 0005768 // endosome // inferred from electronic annotation /// 0005794 // Golgi apparatus // inferred from electronic annotation /// 0005794 // Golgi apparatus // not recorded /// 0010008 // endosome membrane // inferred from electronic annotation /// 00160…	---	Golim4	golgi integral membrane protein 4	9.81599	9.88103	9.79512	10.0342	9.61172	9.63165	9.65513	9.65935	0.0206413	680.886	184
1370964_at	0000050 // urea cycle // inferred from direct assay /// 0000050 // urea cycle // inferred from electronic annotation /// 0000053 // argininosuccinate metabolic process // inferred from direct assay /// 0001101 // response to acid // inferred from expression pattern /// 0001822 // kidney development // inferred from expression pattern /// 0001889 // liver development // inferred from expression pa…	0005634 // nucleus // inferred from direct assay /// 0005737 // cytoplasm // inferred from direct assay /// 0005739 // mitochondrion // not recorded /// 0005739 // mitochondrion // inferred from electronic annotation /// 0005741 // mitochondrial outer membrane // inferred from direct assay /// 0005764 // lysosome // inferred from direct assay /// 0005783 // endoplasmic reticulum // inferred from …	0000166 // nucleotide binding // inferred from electronic annotation /// 0004055 // argininosuccinate synthase activity // inferred from direct assay /// 0004055 // argininosuccinate synthase activity // not recorded /// 0004055 // argininosuccinate synthase activity // inferred from electronic annotation /// 0005524 // ATP binding // inferred from electronic annotation /// 0015643 // toxin bindi…	Ass1	argininosuccinate synthase 1	12.6267	12.5881	12.6319	12.4412	12.2729	12.3186	12.424	12.3075	0.0206649	682.009	185
1377626_at	---	---	---	LOC100911030	uncharacterized LOC100911030	7.97944	7.96413	7.24338	8.03654	7.38338	7.35843	7.57766	7.73134	0.0206882	683.228	186
1385709_x_at	---	---	---	---	---	9.49256	9.08888	9.3697	9.33986	9.05427	8.92229	9.24299	8.9874	0.0206952	684.709	187
1372352_at	0006986 // response to unfolded protein // inferred from electronic annotation	0005576 // extracellular region // inferred from electronic annotation /// 0005615 // extracellular space // inferred from direct assay /// 0005783 // endoplasmic reticulum // inferred from direct assay /// 0048471 // perinuclear region of cytoplasm // inferred from direct assay	0008083 // growth factor activity // inferred from electronic annotation	Manf	mesencephalic astrocyte-derived neurotrophic factor	11.2113	11.2117	11.5127	11.1754	11.1419	11.0161	11.0716	10.9216	0.020734	685.904	188
1394082_at	0010950 // positive regulation of endopeptidase activity // not recorded /// 0010950 // positive regulation of endopeptidase activity // inferred from electronic annotation /// 0061136 // regulation of proteasomal protein catabolic process // not recorded /// 0061136 // regulation of proteasomal protein catabolic process // inferred from electronic annotation	0000502 // proteasome complex // inferred from electronic annotation	0061133 // endopeptidase activator activity // not recorded /// 0061133 // endopeptidase activator activity // inferred from electronic annotation /// 0070628 // proteasome binding // not recorded /// 0070628 // proteasome binding // inferred from electronic annotation	Psmd14	proteasome (prosome, macropain) 26S subunit, non-ATPase, 14	8.47571	8.54828	8.903	8.86059	8.38204	8.53823	8.46152	8.36697	0.0206614	686.477	189
1378927_at	---	---	---	---	---	12.8559	12.9529	12.8996	12.9534	12.5603	12.7171	12.8331	12.5805	0.0206368	687.326	190
1398869_at	0001824 // blastocyst development // inferred from electronic annotation /// 0001824 // blastocyst development // not recorded /// 0006200 // ATP catabolic process // traceable author statement /// 0030163 // protein catabolic process // inferred from electronic annotation	0000502 // proteasome complex // inferred from electronic annotation /// 0005634 // nucleus // inferred from electronic annotation /// 0005634 // nucleus // not recorded /// 0005730 // nucleolus // not recorded /// 0005737 // cytoplasm // inferred from electronic annotation /// 0005737 // cytoplasm // not recorded /// 0005739 // mitochondrion // not recorded	0000166 // nucleotide binding // inferred from electronic annotation /// 0005524 // ATP binding // inferred from electronic annotation /// 0016787 // hydrolase activity // inferred from electronic annotation /// 0016887 // ATPase activity // traceable author statement /// 0017111 // nucleoside-triphosphatase activity // inferred from electronic annotation	Psmc4	proteasome (prosome, macropain) 26S subunit, ATPase, 4	9.8153	9.83006	10.054	9.87373	9.59754	9.74197	9.69204	9.59712	0.0207958	689.779	191
1398482_at	0000060 // protein import into nucleus, translocation // inferred from electronic annotation /// 0000060 // protein import into nucleus, translocation // not recorded /// 0002268 // follicular dendritic cell differentiation // inferred from electronic annotation /// 0002268 // follicular dendritic cell differentiation // not recorded /// 0002315 // marginal zone B cell differentiation // inferred…	0005634 // nucleus // inferred from electronic annotation /// 0005634 // nucleus // not recorded /// 0005737 // cytoplasm // inferred from electronic annotation /// 0005737 // cytoplasm // not recorded /// 0032996 // Bcl3-Bcl10 complex // inferred from electronic annotation /// 0032996 // Bcl3-Bcl10 complex // not recorded /// 0033257 // Bcl3/NF-kappaB2 complex // inferred from electronic annotat…	0003677 // DNA binding // inferred from electronic annotation /// 0003677 // DNA binding // not recorded /// 0003700 // sequence-specific DNA binding transcription factor activity // inferred from electronic annotation /// 0003700 // sequence-specific DNA binding transcription factor activity // not recorded /// 0008134 // transcription factor binding // inferred from electronic annotation /// 00…	Bcl3	B-cell CLL/lymphoma 3	7.79594	7.49409	7.40961	7.38963	7.79532	7.18205	7.04262	6.98356	0.0208958	691.624	192
1371239_s_at	0007420 // brain development // inferred from expression pattern	0005737 // cytoplasm // inferred from electronic annotation /// 0005856 // cytoskeleton // inferred from electronic annotation	0003779 // actin binding // inferred from electronic annotation	Tpm3	tropomyosin 3, gamma	7.61951	7.75108	7.86443	7.85649	7.45792	7.58024	7.59449	7.51088	0.0208031	691.674	193
1369177_at	0002561 // basophil degranulation // inferred from mutant phenotype /// 0006661 // phosphatidylinositol biosynthetic process // not recorded /// 0016310 // phosphorylation // inferred from electronic annotation	0005737 // cytoplasm // inferred from electronic annotation /// 0005792 // microsome // inferred from direct assay /// 0005886 // plasma membrane // inferred from direct assay /// 0005887 // integral to plasma membrane // not recorded /// 0016020 // membrane // inferred from electronic annotation /// 0030672 // synaptic vesicle membrane // inferred from direct assay /// 0031901 // early endosome …	0000166 // nucleotide binding // inferred from electronic annotation /// 0004430 // 1-phosphatidylinositol 4-kinase activity // inferred from direct assay /// 0004430 // 1-phosphatidylinositol 4-kinase activity // not recorded /// 0004430 // 1-phosphatidylinositol 4-kinase activity // inferred from electronic annotation /// 0005524 // ATP binding // inferred from electronic annotation /// 0016301…	Pi4k2a	phosphatidylinositol 4-kinase type 2 alpha	7.55089	7.53322	7.53756	7.39601	7.43956	7.26603	7.1949	7.06022	0.0211649	696.005	194
1391485_at	---	---	---	LOC100912487	uncharacterized LOC100912487	8.13861	9.00089	8.90992	8.40764	8.16081	7.99911	8.23539	8.89606	0.0211436	696.679	195
1374339_at	---	---	---	---	---	8.71636	8.60948	8.89444	9.0045	8.632	8.51073	8.44923	8.5869	0.0210561	697.062	196
1384274_at	0007276 // gamete generation // inferred from electronic annotation	---	---	LOC367746	similar to Spindlin-like protein 2 (SPIN-2)	5.91125	7.61477	7.56327	5.67963	6.05536	5.99015	6.08546	7.22234	0.0215279	702.715	197
1387913_at	0007565 // female pregnancy // inferred from expression pattern /// 0008202 // steroid metabolic process // not recorded /// 0009804 // coumarin metabolic process // not recorded /// 0009820 // alkaloid metabolic process // not recorded /// 0009822 // alkaloid catabolic process // not recorded /// 0010033 // response to organic substance // inferred from expression pattern /// 0016098 // monoterp…	0005737 // cytoplasm // not recorded /// 0005737 // cytoplasm // inferred from electronic annotation /// 0005739 // mitochondrion // not recorded /// 0005783 // endoplasmic reticulum // inferred from electronic annotation /// 0005789 // endoplasmic reticulum membrane // inferred from electronic annotation /// 0005792 // microsome // inferred from direct assay /// 0005792 // microsome // not recor…	0004497 // monooxygenase activity // inferred from direct assay /// 0004497 // monooxygenase activity // not recorded /// 0004497 // monooxygenase activity // traceable author statement /// 0004497 // monooxygenase activity // inferred from electronic annotation /// 0004509 // steroid 21-monooxygenase activity // inferred from mutant phenotype /// 0005506 // iron ion binding // inferred from elec…	Cyp2d4	cytochrome P450, family 2, subfamily d, polypeptide 4	7.86915	8.17531	8.11816	7.8068	7.88642	7.63159	7.63403	7.66112	0.0217273	705.575	198
1392416_at	---	---	---	---	---	6.58088	6.67319	6.64481	6.56335	6.25757	6.0851	6.57268	6.47711	0.0217236	706.399	199
1387034_at	0006558 // L-phenylalanine metabolic process // inferred from direct assay /// 0006559 // L-phenylalanine catabolic process // inferred from electronic annotation /// 0006571 // tyrosine biosynthetic process // inferred from direct assay /// 0008152 // metabolic process // inferred from electronic annotation /// 0009072 // aromatic amino acid family metabolic process // inferred from electronic a…	---	0003824 // catalytic activity // inferred from electronic annotation /// 0004497 // monooxygenase activity // inferred from electronic annotation /// 0004505 // phenylalanine 4-monooxygenase activity // inferred from direct assay /// 0004505 // phenylalanine 4-monooxygenase activity // inferred from electronic annotation /// 0004505 // phenylalanine 4-monooxygenase activity // not recorded /// 00…	Pah	phenylalanine hydroxylase	13.1526	13.1078	13.1875	13.2061	12.9015	12.8958	12.9543	12.9584	0.021665	706.672	200
1382907_at	---	---	---	Fam46c	family with sequence similarity 46, member C	7.37181	7.78004	7.8258	7.44867	7.26248	7.19681	7.50527	7.3357	0.0216517	707.312	201
1373620_at	0032367 // intracellular cholesterol transport // not recorded /// 0055092 // sterol homeostasis // not recorded	0005622 // intracellular // not recorded /// 0005789 // endoplasmic reticulum membrane // not recorded	0016765 // transferase activity, transferring alkyl or aryl (other than methyl) groups // inferred from electronic annotation	Nus1	nuclear undecaprenyl pyrophosphate synthase 1 homolog (S. cerevisiae)	8.91397	8.95465	9.0352	8.9605	8.8709	8.64431	8.76407	8.63535	0.0221188	712.646	202
1381623_at	0048025 // negative regulation of nuclear mRNA splicing, via spliceosome // not recorded /// 0048025 // negative regulation of nuclear mRNA splicing, via spliceosome // inferred from electronic annotation	---	0000166 // nucleotide binding // inferred from electronic annotation /// 0003676 // nucleic acid binding // inferred from electronic annotation	Srsf4	serine/arginine-rich splicing factor 4	9.81311	9.68239	9.59351	9.7682	9.40655	9.61875	9.54274	9.24422	0.0221084	713.455	203
1374431_at	0006810 // transport // inferred from electronic annotation /// 0006811 // ion transport // inferred from electronic annotation /// 0015991 // ATP hydrolysis coupled proton transport // inferred from electronic annotation /// 0015992 // proton transport // inferred from electronic annotation /// 0046034 // ATP metabolic process // inferred from electronic annotation	0005739 // mitochondrion // inferred from electronic annotation /// 0005739 // mitochondrion // not recorded /// 0005829 // cytosol // inferred from electronic annotation /// 0005829 // cytosol // not recorded /// 0005886 // plasma membrane // not recorded /// 0005886 // plasma membrane // inferred from electronic annotation /// 0005902 // microvillus // inferred from electronic annotation /// 00…	0005524 // ATP binding // inferred from electronic annotation /// 0016820 // hydrolase activity, acting on acid anhydrides, catalyzing transmembrane movement of substances // inferred from electronic annotation /// 0046933 // hydrogen ion transporting ATP synthase activity, rotational mechanism // inferred from electronic annotation /// 0046961 // proton-transporting ATPase activity, rotational m…	Atp6v1a	ATPase, H+ transporting, lysosomal V1 subunit A	9.31568	9.26484	9.47643	9.39011	9.1441	9.20045	9.03833	9.16044	0.0221275	715.034	204
1372458_at	---	---	---	---	---	7.62972	7.98506	7.99468	7.65531	7.71032	7.44699	7.43661	7.549	0.022039	715.168	205
1377092_at	---	---	---	---	---	7.69103	7.13091	7.33307	7.89945	7.27363	6.61916	7.76257	7.10834	0.021966	715.325	206
1373303_at	0000245 // spliceosomal complex assembly // not recorded /// 0000245 // spliceosomal complex assembly // inferred from electronic annotation /// 0000375 // RNA splicing, via transesterification reactions // not recorded /// 0000375 // RNA splicing, via transesterification reactions // inferred from electronic annotation /// 0008380 // RNA splicing // not recorded /// 0008380 // RNA splicing // in…	0005634 // nucleus // not recorded /// 0005634 // nucleus // inferred from electronic annotation /// 0005730 // nucleolus // not recorded	0008270 // zinc ion binding // inferred from electronic annotation /// 0046872 // metal ion binding // inferred from electronic annotation	Scaf11	SR-related CTD-associated factor 11	7.6877	7.77967	7.74346	7.74371	7.66199	7.32365	7.39042	7.67287	0.0221932	718.877	207
1398877_at	---	0005634 // nucleus // inferred from electronic annotation /// 0005737 // cytoplasm // inferred from electronic annotation /// 0043234 // protein complex // inferred from direct assay	0008022 // protein C-terminus binding // inferred from physical interaction /// 0030544 // Hsp70 protein binding // inferred from physical interaction /// 0051087 // chaperone binding // inferred from physical interaction	Stip1	stress-induced phosphoprotein 1	8.53438	8.63967	8.93618	8.82271	8.28748	8.51059	8.69328	8.30616	0.0221058	719.034	208
1388901_at	0000413 // protein peptidyl-prolyl isomerization // not recorded /// 0000413 // protein peptidyl-prolyl isomerization // inferred from electronic annotation /// 0006457 // protein folding // inferred from electronic annotation /// 0018208 // peptidyl-proline modification // not recorded	0005634 // nucleus // inferred from electronic annotation /// 0005634 // nucleus // not recorded /// 0005730 // nucleolus // not recorded /// 0016020 // membrane // not recorded	0003755 // peptidyl-prolyl cis-trans isomerase activity // not recorded /// 0003755 // peptidyl-prolyl cis-trans isomerase activity // inferred from electronic annotation /// 0005528 // FK506 binding // not recorded /// 0016853 // isomerase activity // inferred from electronic annotation /// 0031072 // heat shock protein binding // inferred from electronic annotation /// 0031072 // heat shock pro…	Fkbp5	FK506 binding protein 5	8.17966	8.82196	8.63379	8.77174	7.98795	8.44044	8.80335	7.8847	0.0220478	719.352	209
1375686_at	0000413 // protein peptidyl-prolyl isomerization // inferred from electronic annotation /// 0006397 // mRNA processing // inferred from electronic annotation /// 0006457 // protein folding // inferred from electronic annotation /// 0008380 // RNA splicing // inferred from electronic annotation	0005681 // spliceosomal complex // inferred from electronic annotation /// 0071013 // catalytic step 2 spliceosome // not recorded	0003755 // peptidyl-prolyl cis-trans isomerase activity // inferred from electronic annotation /// 0016853 // isomerase activity // inferred from electronic annotation	Ppil3	peptidylprolyl isomerase (cyclophilin)-like 3	7.90986	8.11116	8.42536	8.23874	7.79743	7.94968	7.9444	7.86812	0.022	719.9	210
1389986_at	---	---	---	LOC100912411	uncharacterized LOC100912411	11.5514	11.5568	11.6851	11.6188	11.5799	11.0659	11.1757	11.4414	0.0219194	720.265	211
1382857_at	---	---	---	---	---	8.87103	8.84811	9.10927	9.14576	8.85993	8.46044	8.8461	8.73035	0.0219057	720.848	212
1372533_at	0030433 // ER-associated protein catabolic process // inferred from electronic annotation /// 0030433 // ER-associated protein catabolic process // not recorded	0016020 // membrane // inferred from electronic annotation /// 0030176 // integral to endoplasmic reticulum membrane // inferred from electronic annotation /// 0030176 // integral to endoplasmic reticulum membrane // not recorded	0004559 // alpha-mannosidase activity // not recorded /// 0004571 // mannosyl-oligosaccharide 1,2-alpha-mannosidase activity // inferred from electronic annotation /// 0004571 // mannosyl-oligosaccharide 1,2-alpha-mannosidase activity // not recorded /// 0005509 // calcium ion binding // inferred from electronic annotation /// 0051787 // misfolded protein binding // inferred from electronic annot…	Edem1	ER degradation enhancer, mannosidase alpha-like 1	11.9202	12.3093	12.3316	12.4912	11.6312	12.2597	12.2679	11.8478	0.0222207	725.161	213
1373403_at	---	---	---	LOC684871	similar to Protein C8orf4 (Thyroid cancer protein 1) (TC-1)	8.78638	9.31619	8.67746	8.35019	8.19083	9.14147	8.53851	8.17199	0.0221215	725.272	214
1367854_at	0006084 // acetyl-CoA metabolic process // inferred from direct assay /// 0006085 // acetyl-CoA biosynthetic process // non-traceable author statement /// 0006101 // citrate metabolic process // inferred from direct assay /// 0006629 // lipid metabolic process // inferred from expression pattern /// 0006633 // fatty acid biosynthetic process // inferred from direct assay /// 0008152 // metabolic …	0005625 // soluble fraction // inferred from direct assay /// 0005634 // nucleus // not recorded /// 0005730 // nucleolus // not recorded /// 0005737 // cytoplasm // inferred from electronic annotation /// 0005737 // cytoplasm // not recorded /// 0005739 // mitochondrion // not recorded /// 0005886 // plasma membrane // not recorded	0000166 // nucleotide binding // inferred from electronic annotation /// 0003824 // catalytic activity // inferred from electronic annotation /// 0003878 // ATP citrate synthase activity // inferred from direct assay /// 0003878 // ATP citrate synthase activity // inferred from electronic annotation /// 0004775 // succinate-CoA ligase (ADP-forming) activity // inferred from electronic annotation …	Acly	ATP citrate lyase	10.6228	11.5905	11.7866	11.5977	10.8437	11.3563	11.4009	11.0383	0.0222186	727.222	215
1394706_at	---	---	---	---	---	7.23654	7.49056	7.4345	7.48348	7.11552	6.96951	7.20934	7.33527	0.0224444	729.789	216
1382975_at	0007155 // cell adhesion // inferred from electronic annotation /// 0007165 // signal transduction // inferred from direct assay /// 0043406 // positive regulation of MAP kinase activity // inferred from direct assay	0005886 // plasma membrane // inferred from electronic annotation /// 0005887 // integral to plasma membrane // traceable author statement /// 0016020 // membrane // inferred from electronic annotation /// 0016021 // integral to membrane // not recorded /// 0016021 // integral to membrane // inferred from electronic annotation	0019901 // protein kinase binding // inferred from physical interaction	Ceacam1	carcinoembryonic antigen-related cell adhesion molecule 1 (biliary glycoprotein)	8.60104	8.86277	8.82437	8.85118	8.74332	8.46787	8.50272	8.43035	0.0224378	730.61	217
1384186_at	0030433 // ER-associated protein catabolic process // inferred from electronic annotation /// 0030433 // ER-associated protein catabolic process // not recorded	0016020 // membrane // inferred from electronic annotation /// 0030176 // integral to endoplasmic reticulum membrane // inferred from electronic annotation /// 0030176 // integral to endoplasmic reticulum membrane // not recorded	0004559 // alpha-mannosidase activity // not recorded /// 0004571 // mannosyl-oligosaccharide 1,2-alpha-mannosidase activity // inferred from electronic annotation /// 0004571 // mannosyl-oligosaccharide 1,2-alpha-mannosidase activity // not recorded /// 0005509 // calcium ion binding // inferred from electronic annotation /// 0051787 // misfolded protein binding // inferred from electronic annot…	Edem1	ER degradation enhancer, mannosidase alpha-like 1	9.24775	9.66732	9.72609	9.91577	9.15411	9.5629	9.57352	9.21567	0.0223486	730.716	218
1373383_at	0006351 // transcription, DNA-dependent // inferred from electronic annotation /// 0006355 // regulation of transcription, DNA-dependent // inferred from electronic annotation /// 0045892 // negative regulation of transcription, DNA-dependent // inferred from electronic annotation /// 0045892 // negative regulation of transcription, DNA-dependent // not recorded /// 0045892 // negative regulation…	0005739 // mitochondrion // inferred from electronic annotation /// 0005739 // mitochondrion // not recorded /// 0005739 // mitochondrion // inferred from sequence or structural similarity	0044212 // transcription regulatory region DNA binding // inferred from electronic annotation /// 0044212 // transcription regulatory region DNA binding // not recorded /// 0044212 // transcription regulatory region DNA binding // inferred from sequence or structural similarity	Mterfd1	MTERF domain containing 1	9.43212	9.45947	9.53398	9.56621	9.35425	9.16229	9.21592	9.34487	0.0222557	730.767	219
1372381_at	---	---	---	---	---	8.27329	8.762	8.70837	8.20436	7.94917	8.0565	8.30524	8.29873	0.0222318	731.219	220
1379526_at	---	---	---	---	---	8.51396	8.46089	8.56362	8.18591	8.10258	7.96789	8.34464	8.19479	0.0223077	732.798	221
1368239_at	0006897 // endocytosis // inferred from electronic annotation	0005905 // coated pit // inferred from electronic annotation /// 0016020 // membrane // inferred from electronic annotation /// 0016021 // integral to membrane // inferred from electronic annotation	0004872 // receptor activity // inferred from electronic annotation	Lrp3	low density lipoprotein receptor-related protein 3	8.49335	8.41501	8.49622	8.59388	8.3743	8.28055	8.22965	8.20399	0.0223288	733.795	222
1384759_at	0043966 // histone H3 acetylation // inferred from electronic annotation /// 0043966 // histone H3 acetylation // not recorded /// 0043981 // histone H4-K5 acetylation // inferred from electronic annotation /// 0043981 // histone H4-K5 acetylation // not recorded /// 0043982 // histone H4-K8 acetylation // inferred from electronic annotation /// 0043982 // histone H4-K8 acetylation // not recorde…	0000123 // histone acetyltransferase complex // inferred from electronic annotation /// 0000123 // histone acetyltransferase complex // not recorded /// 0005634 // nucleus // not recorded /// 0005634 // nucleus // inferred from electronic annotation /// 0005737 // cytoplasm // not recorded /// 0005737 // cytoplasm // inferred from electronic annotation /// 0005739 // mitochondrion // inferred fro…	0008270 // zinc ion binding // inferred from electronic annotation /// 0046872 // metal ion binding // inferred from electronic annotation	Phf17	PHD finger protein 17	7.41873	7.71386	7.78922	8.01666	7.08177	7.11236	7.60047	7.91842	0.0223453	734.902	223
1367721_at	0001657 // ureteric bud development // inferred from expression pattern /// 0007155 // cell adhesion // non-traceable author statement /// 0007267 // cell-cell signaling // non-traceable author statement /// 0045860 // positive regulation of protein kinase activity // inferred from mutant phenotype /// 0051496 // positive regulation of stress fiber assembly // inferred from mutant phenotype /// 0…	0005576 // extracellular region // inferred from electronic annotation /// 0005925 // focal adhesion // inferred from direct assay /// 0009986 // cell surface // inferred from direct assay /// 0009986 // cell surface // not recorded /// 0009986 // cell surface // inferred from electronic annotation /// 0016020 // membrane // inferred from electronic annotation /// 0016021 // integral to membrane …	0001968 // fibronectin binding // inferred from direct assay /// 0005080 // protein kinase C binding // inferred from direct assay /// 0005515 // protein binding // inferred from physical interaction /// 0008092 // cytoskeletal protein binding // inferred from electronic annotation /// 0070053 // thrombospondin receptor activity // inferred from electronic annotation /// 0070053 // thrombospondin…	Sdc4	syndecan 4	11.4966	11.9867	11.8287	11.6767	11.2658	11.6415	11.8051	11.077	0.0224911	737.012	224
1387725_at	0009058 // biosynthetic process // inferred from electronic annotation /// 0019853 // L-ascorbic acid biosynthetic process // not recorded /// 0019853 // L-ascorbic acid biosynthetic process // inferred from sequence or structural similarity /// 0019853 // L-ascorbic acid biosynthetic process // traceable author statement /// 0019853 // L-ascorbic acid biosynthetic process // inferred from electr…	0005783 // endoplasmic reticulum // inferred from electronic annotation /// 0005789 // endoplasmic reticulum membrane // inferred from electronic annotation /// 0005792 // microsome // traceable author statement /// 0005792 // microsome // inferred from electronic annotation /// 0016020 // membrane // inferred from electronic annotation /// 0016021 // integral to membrane // inferred from electro…	0003824 // catalytic activity // inferred from electronic annotation /// 0003885 // D-arabinono-1,4-lactone oxidase activity // inferred from electronic annotation /// 0008762 // UDP-N-acetylmuramate dehydrogenase activity // inferred from electronic annotation /// 0016491 // oxidoreductase activity // inferred from electronic annotation /// 0016614 // oxidoreductase activity, acting on CH-OH gro…	Gulo	gulonolactone (L-) oxidase	9.7176	10.0116	10.2049	9.62606	9.51021	9.41775	9.79333	9.64834	0.0224089	737.32	225
1398514_at	0006520 // cellular amino acid metabolic process // not recorded /// 0006559 // L-phenylalanine catabolic process // inferred from electronic annotation /// 0006570 // tyrosine metabolic process // inferred from electronic annotation /// 0055114 // oxidation-reduction process // inferred from electronic annotation	---	0004411 // homogentisate 1,2-dioxygenase activity // not recorded /// 0004411 // homogentisate 1,2-dioxygenase activity // inferred from electronic annotation /// 0016702 // oxidoreductase activity, acting on single donors with incorporation of molecular oxygen, incorporation of two atoms of oxygen // inferred from electronic annotation	Hgd	homogentisate 1, 2-dioxygenase	11.7301	11.8876	11.8809	11.7832	11.5812	11.556	11.5871	11.6485	0.0226195	739.742	226
1396053_at	---	0000922 // spindle pole // inferred from electronic annotation /// 0000922 // spindle pole // not recorded /// 0005634 // nucleus // inferred from electronic annotation /// 0005634 // nucleus // not recorded	---	Nedd9	neural precursor cell expressed, developmentally down-regulated 9	7.42693	6.71701	6.88189	7.58396	7.02299	6.58475	6.81509	6.86116	0.0229119	743.097	227
1369415_at	0000122 // negative regulation of transcription from RNA polymerase II promoter // inferred from mutant phenotype /// 0000122 // negative regulation of transcription from RNA polymerase II promoter // not recorded /// 0000122 // negative regulation of transcription from RNA polymerase II promoter // inferred from electronic annotation /// 0006351 // transcription, DNA-dependent // inferred from e…	0005634 // nucleus // inferred from direct assay /// 0005634 // nucleus // not recorded /// 0005634 // nucleus // inferred from electronic annotation /// 0005730 // nucleolus // inferred from electronic annotation /// 0005730 // nucleolus // not recorded /// 0005794 // Golgi apparatus // inferred from electronic annotation /// 0005794 // Golgi apparatus // not recorded	0000981 // sequence-specific DNA binding RNA polymerase II transcription factor activity // not recorded /// 0000981 // sequence-specific DNA binding RNA polymerase II transcription factor activity // inferred from electronic annotation /// 0001078 // RNA polymerase II core promoter proximal region sequence-specific DNA binding transcription factor activity involved in negative regulation of tran…	Bhlhe40	basic helix-loop-helix family, member e40	8.42089	7.39948	7.60901	8.74212	7.83349	7.45056	7.89544	7.54839	0.0228377	743.507	228
1373158_at	---	---	---	---	---	8.43802	7.9745	8.03677	8.1954	7.97638	7.82975	7.92488	7.86807	0.0228122	743.95	229
1395536_at	---	---	---	---	---	7.77268	8.03404	7.83625	6.832	7.69069	7.3079	7.37084	7.29468	0.0228217	744.799	230
1380695_at	---	---	---	---	---	8.10836	8.00195	8.03548	7.98052	7.95535	7.61404	7.86242	7.76841	0.0227965	745.548	231
1384163_at	---	---	---	---	---	10.0947	10.6829	10.6146	9.83722	9.63657	10.346	10.2539	9.82965	0.0228017	746.592	232
1398998_at	---	---	---	RGD1309748	similar to CG4768-PA	9.39886	9.07524	9.10927	9.28323	9.04064	8.93406	9.03227	8.94685	0.0227296	746.743	233
1393439_a_at	0006810 // transport // inferred from electronic annotation /// 0006817 // phosphate ion transport // traceable author statement /// 0006817 // phosphate ion transport // inferred from electronic annotation /// 0030500 // regulation of bone mineralization // not recorded /// 0030500 // regulation of bone mineralization // inferred from sequence or structural similarity /// 0030500 // regulation o…	0005886 // plasma membrane // not recorded /// 0005886 // plasma membrane // inferred from sequence or structural similarity /// 0005886 // plasma membrane // inferred from electronic annotation /// 0005887 // integral to plasma membrane // not recorded /// 0005887 // integral to plasma membrane // inferred from sequence or structural similarity /// 0005887 // integral to plasma membrane // infer…	0005315 // inorganic phosphate transmembrane transporter activity // not recorded /// 0005315 // inorganic phosphate transmembrane transporter activity // traceable author statement /// 0005315 // inorganic phosphate transmembrane transporter activity // inferred from electronic annotation /// 0015114 // phosphate ion transmembrane transporter activity // inferred from electronic annotation /// 0…	Ankh	ankylosis, progressive homolog (mouse)	9.84615	9.3958	9.7457	9.70483	9.41063	9.26256	9.57555	9.31957	0.0226795	747.144	234
1388233_at	0007205 // protein kinase C-activating G-protein coupled receptor signaling pathway // inferred from electronic annotation /// 0007205 // protein kinase C-activating G-protein coupled receptor signaling pathway // not recorded /// 0009968 // negative regulation of signal transduction // inferred from electronic annotation /// 0016567 // protein ubiquitination // inferred from electronic annotatio…	0005622 // intracellular // inferred from electronic annotation /// 0005886 // plasma membrane // inferred from electronic annotation /// 0005886 // plasma membrane // not recorded	---	Cish	cytokine inducible SH2-containing protein	7.15501	6.07955	5.94497	7.07932	6.19026	6.08065	6.61954	5.93343	0.0229915	751.339	235
1374709_at	---	---	---	---	---	7.18348	7.30289	7.51408	7.50687	7.03259	6.95176	7.08422	7.39592	0.0229746	752.154	236
1383825_at	0030033 // microvillus assembly // not recorded /// 0030033 // microvillus assembly // inferred from electronic annotation /// 0045176 // apical protein localization // inferred from mutant phenotype /// 0045176 // apical protein localization // not recorded /// 0045176 // apical protein localization // inferred from electronic annotation /// 0051016 // barbed-end actin filament capping // inferr…	0001726 // ruffle // not recorded /// 0001726 // ruffle // inferred from electronic annotation /// 0005730 // nucleolus // not recorded /// 0005730 // nucleolus // inferred from electronic annotation /// 0005737 // cytoplasm // inferred from electronic annotation /// 0005794 // Golgi apparatus // not recorded /// 0005794 // Golgi apparatus // inferred from electronic annotation /// 0005856 // cyt…	0003779 // actin binding // inferred from direct assay /// 0005515 // protein binding // inferred from physical interaction /// 0008092 // cytoskeletal protein binding // inferred from electronic annotation	Rdx	radixin	9.46431	9.89467	9.97174	9.84688	9.92906	9.06587	9.3838	9.57801	0.0228819	752.226	237
[truncated: 259 more rows]
